# Supplementary material for: Facile synthesis of functionalized 6-cyano-2-oxa-7-azabicyclo[4.1.0]hept-3-en-1-yl acetates: a catalyst free approach to access the pyran fused 2-acetoxy-NH-aziridines
Source: Royal Society of Chemistry journal article supplement (doi:10.1039/c5ra24510a), 2015-12-16
Supplement: c5ra24510a1.pdf [file c5ra24510a1.pdf]

### Electronic Supplementary Information

#### Facile synthesis of functionalized 6-cyano-2-oxa-7-azabicyclo[4.1.0]hept-3-en-1-yl acetate : a catalyst free approach to access the pyran fused 2-acetoxy-NH-aziridines

Prasun Mukherjee, Asish R. Das\*

Department of Chemistry, University of Calcutta, Kolkata-700009, India

\*Corresponding author. Tel.: +913323501014, +919433120265; fax: +913323519754;

E-mail address: [ardchem@caluniv.ac.in](mailto:ardchem@caluniv.ac.in), [ardas66@rediffmail.com](mailto:ardas66@rediffmail.com) (A R Das)

| Content                                                         | Page Numbers |
|-----------------------------------------------------------------|--------------|
| Materials and method                                            | S2           |
| Experimental procedures                                         | S3-S4        |
| Spectral data                                                   | S5-S12       |
| <sup>1</sup> H and <sup>13</sup> C NMR spectra of all compounds | S13-S56      |

## Materials and Method

$^1\text{H}$ -NMR and  $^{13}\text{C}$ -NMR spectral analysis were carried out on Bruker-Advance Digital 300 MHz and 75 MHz instruments where tetramethylsilane (TMS) was used as internal standard. Infrared spectra were recorded in KBr pellets in reflection mode on a Perkin Elmer RX-1 FTIR spectrophotometer. High Resolution Mass Spectra were obtained using a QTOFMICRO YA263 mass spectrometer. Elemental analyses were done using an autoanalyzer. Suitable single crystals of compound 2a, 2h, 2j and 3b were mounted on a Bruker-AXS SMART APEX II diffractometer equipped with a graphite monochromator. All the reactions were monitored by thin layer chromatography carried out on Merck aluminum-blocked silica gel plates coated with silica gel G under UV light and also by exposure to iodine vapour for detection. Melting points were recorded on a Köfler Block apparatus and are uncorrected. Synthetic grade chemicals from Sigma-Aldrich, Spectrochem and E-Merck were used for carrying out the organic reactions. For column chromatography Spectrochem 100-200 mesh silica gel was used. All the organic solvents, used in the reaction, were distilled and dried over  $\text{Na}_2\text{SO}_4$ .

## Experimental procedures

### General procedure for the synthesis of 4-H-pyrans.

Triethylamine (1 drop) was added to a solution of aromatic aldehydes (2 mmol), malononitrile (2 mmol), and 1,3-diketones (2 mmol) in EtOH (5 ml) and the reaction mixture was refluxed for 15 min. The precipitate that formed was filtered off, washed with water (5×10 ml) and EtOH (3×5 ml), and finally recrystallized from EtOH. The crystallized pure compounds were then subjected for the synthesis of chromeno[2,3-*b*]azirin-1a(1*H*)-yl acetates.

### General procedure for the synthesis of spiropyrans.

Triethylamine (1 drop) was added to a solution of ninhydrin (2 mmol), malononitrile (2 mmol), and 1,3-diketones (2 mmol) in EtOH (5 ml) and the reaction mixture was refluxed for 15 min. The precipitate that formed was filtered off, washed with water (5×10 ml) and EtOH (3×5 ml), and finally recrystallized from EtOH. The crystallized pure compounds were then subjected for the synthesis of chromeno[2,3-*b*]azirin-1a(1*H*)-yl acetates.

### General procedure for the synthesis of 6-cyano-2-oxa-7-azabicyclo[4.1.0]hept-3-en-1-yl acetate (2).

To a stirring suspension of 2-amino-3-cyano-4-*H*-pyrans (1 mmol) in 3 ml of DCM, 1.1 mmol of PIDA was added and stirring was continued at r.t. After the total consumption of the starting material, indicated by TLC (20-40 % ethyl acetate in petroleum ether), the reaction mixture was directly subjected for column chromatography (15- 30% ethyl acetate in petroleum ether) to afford the pure product. Same procedure was applied in case of 2-amino-3-cyano-spiropyrans. The isolated products were characterized by spectral (<sup>1</sup>H NMR, <sup>13</sup>C NMR, IR, HRMS), and X-ray crystallographic analysis.

**General procedure for the synthesis of 6-cyano-2-oxa-7-azabicyclo[4.1.0]hept-3-en-1-yl carboxylate (3):**

To a stirring mixture of 2-amino-3-cyano-4*H*-pyrans (1 mmol), triethylamine (2 mmol) and carboxylic acids (2 mmol) in 3 ml of DCM, 1.1 mmol of PIDA was added and stirring was continued at r.t. After the total consumption of the starting material, indicated by TLC (20-40% ethyl acetate in petroleum ether), the reaction mixture was directly subjected for column chromatography (15-30% ethyl acetate in petroleum ether) to afford the pure product. The isolated products were characterized by spectral (<sup>1</sup>H NMR, <sup>13</sup>C NMR, IR, HRMS), and X-ray crystallographic analysis.

**7a-cyano-7-(4-nitrophenyl)-6-oxo-3,4,5,6,7,7a-hexahydrochromeno[2,3-b]azirin-1a(1H)-yl acetate (2a).** Yield: (0.340g, 92%); Off-white solid; m.p. 190-192 °C; IR (KBr): $\text{cm}^{-1}$ ; 3300, 3158, 2932, 2243, 1787, 1647, 1515, 1371, 1348, 1240, 1165, 1097, 995, 918, 862, 733, 597, 519;  $\delta_{\text{H}}$  (300 MHz;  $\text{CDCl}_3$ ;  $\text{Me}_4\text{Si}$ ):  $\delta$  1.99-2.06 (m, 2H), 2.26-2.35 (m, 5H), 2.45 (s, 1H), 2.55 (d,  $J=5.4$  Hz, 2H), 4.42 (s, 1H), 7.39 (d,  $J=8.4$  Hz, 2H), 8.17 (d,  $J=8.7$  Hz, 2H);  $\delta_{\text{C}}$  (75 MHz;  $\text{CDCl}_3$ ;  $\text{Me}_4\text{Si}$ ):  $\delta$  20.1, 20.4, 28.0, 36.3, 36.8, 39.4, 42.6, 87.9, 109.6, 115.4, 123.8, 128.8, 144.3, 147.5, 166.1, 167.1, 195.8; HRMS (ESI-TOF)  $m/z$  Calcd for  $[\text{C}_{18}\text{H}_{15}\text{N}_3\text{O}_6+\text{H}]^+$ : 370.1034, found: 370.1032.

**7a-cyano-6-oxo-7-phenyl-3,4,5,6,7,7a-hexahydrochromeno[2,3-b]azirin-1a(1H)-yl acetate (2b).** Yield: (0.288g, 89%); Off white solid; m.p. 132-134 °C; IR (KBr): $\text{cm}^{-1}$ ; 3175, 2963, 2238, 1791, 1631, 1372, 1238, 1229, 1152, 1100, 1063, 936, 870, 730, 700, 608, 519;  $\delta_{\text{H}}$  (300 MHz; mixture of  $\text{CDCl}_3$  and  $\text{DMSO-d}_6$ ;  $\text{Me}_4\text{Si}$ ):  $\delta$  1.81 (d,  $J=4.8$  Hz, 2H), 2.00-2.10 (m, 5H), 2.33 (d,  $J=3.6$ Hz, 2H), 4.12 (d,  $J=11.7$  Hz, 1H), 4.44 (bs, 1H), 7.00-7.10 (m, 5H);  $\delta_{\text{C}}$  (75 MHz; mixture of  $\text{CDCl}_3$  and  $\text{DMSO-d}_6$ ;  $\text{Me}_4\text{Si}$ ):  $\delta$  19.9, 20.3, 27.9, 35.8, 36.8, 53.4, 88.1, 109.8, 116.2, 127.2, 127.6, 128.2, 137.4, 165.5, 167.2, 195.7; HRMS (ESI-TOF)  $m/z$  Calcd for  $[\text{C}_{18}\text{H}_{16}\text{N}_2\text{O}_4+\text{H}]^+$ : 325.1183, found: 325.1188.

**7a-cyano-7-(furan-2-yl)-6-oxo-3,4,5,6,7,7a-hexahydrochromeno[2,3-b]azirin-1a(1H)-yl acetate (2c).** Yield: (0.264g, 84%); Off-white solid; m.p. 126-128 °C; IR (KBr): $\text{cm}^{-1}$ ; 3133, 2955, 2935, 2240, 1784, 1633, 1373, 1169, 1101, 1072, 949, 879, 745, 606, 519;  $\delta_{\text{H}}$  (300 MHz;  $\text{CDCl}_3$ ;  $\text{Me}_4\text{Si}$ ):  $\delta$  1.92-1.98 (m, 2H), 2.19 (s, 3H), 2.29-2.51 (m, 5H), 4.63 (s, 1H), 6.16 (d,  $J=3$  Hz, 1H), 6.28 (t,  $J=2.4$  Hz, 1H), 7.29 (d,  $J=0.6$  Hz, 1H);  $\delta_{\text{C}}$  (75 MHz;  $\text{CDCl}_3$ ;  $\text{Me}_4\text{Si}$ ):  $\delta$  20.0,

20.4, 27.9, 33.4, 35.6, 36.8, 52.6, 87.6, 108.0, 110.6, 115.8, 142.7, 149.6, 165.2, 167.4, 195.6; HRMS (ESI-TOF)  $m/z$  Calcd for  $[C_{16}H_{14}N_2O_5+H]^+$ : 315.0975, found: 315.0981.

**7a-cyano-7-(4-methoxyphenyl)-6-oxo-3,4,5,6,7,7a-hexahydrochromeno[2,3-*b*]azirin-1a(1*H*)-yl acetate (2d).** Yield: (0.318g, 90%); White solid; m.p. 162-164 °C; IR (KBr): $cm^{-1}$ ; 3244, 2958, 2237, 1782, 1666, 1644, 1513, 1371, 1234, 1166, 1101, 1069, 994, 930, 878, 605, 518;  $\delta_H$  (300 MHz;  $CDCl_3$ ;  $Me_4Si$ ):  $\delta$  2.00-2.03 (m, 2H), 2.24-2.38 (m, 6H), 2.55 (d,  $J=5.1$  Hz, 2H), 3.77 (s, 3H), 4.44 (s, 1H), 6.86 (d,  $J=7.5$  Hz, 2H), 7.12 (d,  $J=8.1$  Hz, 2H);  $\delta_C$  (75 MHz;  $CDCl_3$ ;  $Me_4Si$ ):  $\delta$  19.9, 20.2, 27.7, 36.7, 36.8, 38.1, 54.9, 55.0, 87.9, 110.2, 114.0, 114.1, 116.0, 128.2, 128.3, 128.4, 128.5, 128.6, 159.0, 165.1, 167.1, 195.6; HRMS (ESI-TOF)  $m/z$  Calcd for  $[C_{19}H_{18}N_2O_5+H]^+$ : 355.1288, found: 355.1294.

**6-(4-bromophenyl)-6a-cyano-5-oxo-1,3,4,5,6,6a-hexahydro-1aH-cyclopenta[5,6]pyrano[2,3-*b*]azirin-1a-yl acetate (2e).** Yield: (0.350g, 90%); Off-white solid; m.p. 176-178 °C; IR (KBr): $cm^{-1}$ ; 3262, 2935, 2249, 1794, 1707, 1499, 1409, 1375, 1227, 1094, 1001, 930, 870, 742, 730, 647, 604, 521, 503;  $\delta_H$  (300 MHz;  $CDCl_3$ ;  $Me_4Si$ ):  $\delta$  2.29 (s, 3H), 2.45-2.48 (m, 2H), 2.68-2.700 (m, 3H), 4.18 (s, 1H), 7.13 (d,  $J=8.1$  Hz, 2H), 7.50 (d,  $J=7.8$  Hz, 2H);  $\delta_C$  (75 MHz;  $CDCl_3$ ;  $Me_4Si$ ):  $\delta$  20.4, 25.6, 33.5, 38.0, 38.7, 90.6, 113.2, 115.4, 122.6, 129.9, 130.0, 131.9, 132.0, 132.1, 133.3, 167.0, 177.7, 201.0; HRMS (ESI-TOF)  $m/z$  Calcd for  $[C_{17}H_{13}BrN_2O_4+Na]^+$ : 410.9951, found: 410.9955.

**7a-cyano-4,4-dimethyl-7-(3-nitrophenyl)-6-oxo-3,4,5,6,7,7a-hexahydrochromeno[2,3-*b*]azirin-1a(1*H*)-yl acetate (2f).** Yield: (0.354g, 89%); White solid; m.p. 150-152 °C; IR (KBr): $cm^{-1}$ ; 3235, 2956, 2249, 1794, 1668, 1644, 1531, 1371, 1351, 1158, 1098, 943, 919, 876, 727, 674, 617;  $\delta_H$  (300 MHz;  $CDCl_3$ ;  $Me_4Si$ ):  $\delta$  1.02 (s, 3H), 1.07 (s, 3H), 2.16 (d,  $J=3$  Hz, 2H), 2.21 (s, 3H), 2.40 (s, 3H), 4.39 (s, 1H), 7.47 (t,  $J=7.9$  Hz, 1H), 7.61 (d,  $J=7.8$  Hz, 1H), 7.93 (s,

1H), 8.08 (d,  $J=8.1$  Hz, 1H);  $\delta_C$  (75 MHz;  $CDCl_3$ ;  $Me_4Si$ ):  $\delta$  20.0, 27.8, 31.6, 36.1, 38.8, 41.2, 50.4, 87.7, 108.1, 115.1, 122.4, 122.5, 129.2, 134.2, 138.8, 148.1, 164.1, 166.7, 195.4; HRMS (ESI-TOF)  $m/z$  Calcd for  $[C_{20}H_{19}N_3O_6+H]^+$ : 398.1347, found: 398.1331.

**7a-cyano-6-oxo-7-(thiophen-2-yl)-7a,8-dihydro-6H-chromeno[3',4':5,6]pyrano[2,3-*b*]azirin-8a(7H)-yl acetate (2g).** Yield: (0.289g, 76%); Pale yellow solid; m.p. 136-138 °C; IR (KBr): $cm^{-1}$ ; 3238, 2925, 2246, 1787, 1724, 1710, 1631, 1380, 1157, 1099, 1039, 759, 705;  $\delta_H$  (300 MHz;  $CDCl_3$ ;  $Me_4Si$ ):  $\delta$  2.34 (s, 3H), 2.73 (s, 1H), 5.04 (s, 1H), 7.02-7.05 (m, 1H), 7.16 (d,  $J=3.3$  Hz, 1H), 7.26-7.36 (m, 3H), 7.60 (t,  $J=7.2$  Hz, 1H), 7.83 (d,  $J=6.9$  Hz, 1H);  $\delta_C$  (75 MHz;  $CDCl_3$ ;  $Me_4Si$ ):  $\delta$  20.4, 36.5, 37.1, 88.9, 100.3, 113.5, 115.3, 116.8, 123.0, 124.4, 125.8, 127.1, 133.0, 137.6, 152.6, 154.4, 158.7, 159.9, 167.1, 170.9; Anal. Calcd for  $C_{19}H_{12}N_2O_5S$ : C 60.00; H 3.18; N 7.36%. Found: C 60.02; H 3.16; N 7.34%.

**7a-cyano-7-(4-methoxyphenyl)-6-oxo-7a,8-dihydro-6H-chromeno[3',4':5,6]pyrano[2,3-*b*]azirin-8a(7H)-yl acetate (2h).** Yield: (0.364g 90%); Off-white solid; m.p. 192-194 °C; IR (KBr): $cm^{-1}$ ; 3258, 2844, 2248, 1806, 1726, 1638, 1610, 1509, 1380, 1249, 1183, 1161, 1112, 1100, 1023, 946, 763, 720, 568, 541;  $\delta_H$  (300 MHz;  $CDCl_3$ ;  $Me_4Si$ ):  $\delta$  2.32 (s, 3H), 2.62 (s, 1H), 3.80 (s, 3H), 4.64 (s, 1H), 6.90 (d,  $J=8.7$  Hz, 2H), 7.20-7.36 (m, 4H), 7.59 (t,  $J=7.8$  Hz, 1H), 7.83 (d,  $J=7.7$  Hz, 1H);  $\delta_C$  (75 MHz;  $CDCl_3$ ;  $Me_4Si$ ):  $\delta$  20.4, 37.3, 39.9, 55.3, 88.9, 100.5, 113.6, 114.4, 115.7, 116.7, 122.8, 124.3, 127.7, 129.0, 132.7, 152.6, 155.0, 159.6, 160.0, 167.1; HRMS (ESI-TOF)  $m/z$  Calcd for  $[C_{22}H_{16}N_2O_6+H]^+$ : 405.1081, found: 405.1090.

**7-(4-bromophenyl)-7a-cyano-6-oxo-7a,8-dihydro-6H-chromeno[3',4':5,6]pyrano[2,3-*b*]azirin-8a(7H)-yl acetate (2i).** Yield: (0.398g, 88%); Off-white solid; m.p. 168-170 °C; IR (KBr): $cm^{-1}$ ; 3310, 3069, 3051, 2926, 2241, 1768, 1712, 1645, 1489, 1384, 1241, 1163, 1108, 1024, 965, 920, 868, 762, 564, 501;  $\delta_H$  (300 MHz;  $CDCl_3$ ;  $Me_4Si$ ):  $\delta$  2.26 (s, 3H), 2.62 (s, 1H),

4.52 (s, 1H), 7.12 (d,  $J=8.1$  Hz, 2H), 7.19-7.29 (m, 2H), 7.43 (d,  $J=8.4$  Hz, 2H), 7.53 (t,  $J=7.8$  Hz, 1H), 7.77 (d,  $J=7.8$  Hz, 1H);  $\delta_C$  (75 MHz;  $CDCl_3$ ;  $Me_4Si$ ):  $\delta$  20.0, 36.5, 39.9, 88.4, 99.5, 113.2, 114.9, 116.4, 122.1, 122.5, 124.1, 129.3, 129.4, 131.7, 132.6, 134.4, 152.2, 154.9, 159.7, 166.7; HRMS (ESI-TOF)  $m/z$  Calcd for  $[C_{21}H_{13}BrN_2O_5+H]^+$ : 453.0081, found: 453.0079.

**7a-cyano-7-isopropyl-6-oxo-7a,8-dihydro-6H-chromeno[3',4':5,6]pyrano[2,3-*b*]azirin-8a(7H)-yl acetate (2j).** Yield: (0.289g, 85%); White solid; m.p. 174-176 °C; IR (KBr): $cm^{-1}$ ; 3208, 2960, 2243, 1779, 1698, 1632, 1394, 1176, 1112, 1097, 1056, 979, 940, 878, 757;  $\delta_H$  (300 MHz;  $DMSO-d_6$ ;  $Me_4Si$ ):  $\delta$  0.92 (d,  $J=5.4$  Hz, 3H), 1.11 (d,  $J=5.7$  Hz, 3H), 2.26 (s, 3H), 2.48 (s, 1H), 3.31 (s, 1H), 6.34 (s, 1H), 7.36-7.45 (m, 2H), 7.68 (t,  $J=7.7$  Hz, 1H), 7.75 (d,  $J=7.8$  Hz, 1H);  $\delta_C$  (75 MHz;  $DMSO-d_6$ ;  $Me_4Si$ ):  $\delta$  19.3, 20.2, 20.6, 29.8, 31.5, 88.7, 101.6, 113.8, 116.8, 117.7, 122.9, 125.1, 133.4, 152.1, 155.5, 160.9, 168.4; HRMS (ESI-TOF)  $m/z$  Calcd for  $[C_{18}H_{16}N_2O_5+H]^+$ : 341.1132, found: 341.1137.

**7a-cyano-7-isopropyl-4-methyl-6-oxo-7,7a-dihydro-6H-pyrano[3',4':5,6]pyrano[2,3-*b*]azirin-1a(1H)-yl acetate (2k).** Yield: (0.256g, 84%); White solid; m.p. 178-180 °C; IR (KBr): $cm^{-1}$ ; 3236, 2956, 2248, 1781, 1714, 1598, 1398, 1251, 1169, 1090, 953, 883, 669;  $\delta_H$  (300 MHz;  $CDCl_3$ ;  $Me_4Si$ ):  $\delta$  0.91 (d,  $J=6.9$  Hz, 3H), 1.18 (d,  $J=6.9$  Hz, 3H), 2.15 (s, 3H), 2.18 (s, 3H), 2.49 (s, 1H), 2.56-2.63 (m, 1H), 3.31 (d,  $J=6.3$  Hz, 1H), 5.72 (s, 1H);  $\delta_C$  (75 MHz;  $CDCl_3$ ;  $Me_4Si$ ):  $\delta$  18.8, 19.7, 20.1, 20.3, 29.4, 33.4, 38.3, 87.7, 98.5, 98.9, 117.0, 159.9, 161.6, 162.9, 167.3; HRMS (ESI-TOF)  $m/z$  Calcd for  $[C_{15}H_{16}N_2O_5+H]^+$ : 305.1132, found: 305.1149.

**7-(4-bromophenyl)-7a-cyano-4-methyl-6-oxo-7,7a-dihydro-6H-pyrano[3',4':5,6]pyrano[2,3-*b*]azirin-1a(1H)-yl acetate (2l).** Yield: (0.358g, 86%); pale yellow solid; m.p. 170-172 °C; IR (KBr): $cm^{-1}$ ; 3241, 3120, 2245, 1794, 1727, 1694, 1594, 1170, 1158, 1100, 503;  $\delta_H$  (300 MHz;  $CDCl_3$ ;  $Me_4Si$ ):  $\delta$  2.22 (s, 3H), 2.28 (s, 3H), 2.50 (s, 1H), 4.43 (s, 1H), 5.85 (s, 1H), 7.16 (d,



$J=8.4$  Hz, 2H), 7.49 (d,  $J=8.1$  Hz, 2H);  $\delta_C$  (75 MHz;  $\text{CDCl}_3$ ;  $\text{Me}_4\text{Si}$ ):  $\delta$  19.8, 20.3, 37.0, 39.7, 88.3, 96.8, 98.7, 115.4, 122.4, 129.7, 132.0, 134.7, 159.7, 162.6, 167.0; HRMS (ESI-TOF)  $m/z$  Calcd for  $[\text{C}_{18}\text{H}_{13}\text{BrN}_2\text{O}_5+\text{H}]^+$ : 438.9900, found: 438.9864.

**7a-cyano-7-(4-cyanophenyl)-4-methyl-6-oxo-7,7a-dihydro-6H-pyrano[3',4':5,6]pyrano[2,3-b]azirin-1a(1H)-yl acetate (2m).** Yield: (0.320g, 88%); Off-white solid; m.p. 184-186 °C; IR (KBr): $\text{cm}^{-1}$ ; 3229, 2928, 2243, 2221, 1784, 1707, 1599, 1446, 1386, 1239, 1167, 1156, 1103, 1038, 916, 867, 827, 757, 578, 552;  $\delta_H$  (300 MHz;  $\text{CDCl}_3$ ;  $\text{Me}_4\text{Si}$ ):  $\delta$  2.17 (s, 3H), 2.23 (s, 3H), 2.57 (s, 1H), 4.41 (s, 1H), 5.81 (s, 1H), 7.34 (d,  $J=8.1$  Hz, 2H), 7.59 (d,  $J=8.1$  Hz, 2H);  $\delta_C$  (75 MHz;  $\text{CDCl}_3$ ;  $\text{Me}_4\text{Si}$ ):  $\delta$  19.5, 20.0, 36.4, 40.0, 87.9, 96.0, 98.4, 111.8, 114.7, 118.2, 128.6, 132.2, 140.7, 159.6, 161.4, 162.6, 166.6; HRMS (ESI-TOF)  $m/z$  Calcd for  $[\text{C}_{19}\text{H}_{13}\text{N}_3\text{O}_5+\text{H}]^+$ : 364.0928, found: 364.0922.

**7a-cyano-1',3',6-trioxo-1,1',3,3',4,5,6,7a-octahydro-1aH-spiro[chromeno[2,3-b]azirine-7,2'-inden]-1a-yl acetate (2n).** Yield: (0.333g, 88%); Off-white solid; m.p. 190-192 °C; IR (KBr): $\text{cm}^{-1}$ ; 3247, 2967, 2939, 2249, 1790, 1752, 1713, 1665, 1644, 1369, 1249, 1214, 1174, 1106, 1044, 1031, 942, 907, 773, 648, 609;  $\delta_H$  (300 MHz; mixture of  $\text{CDCl}_3$  and  $\text{DMSO-d}_6$ ;  $\text{Me}_4\text{Si}$ ):  $\delta$  1.96-1.99 (m, 2H), 2.17 (s, 3H), 2.22 (d,  $J=5.1$  Hz, 2H), 2.46-2.61(m, 2H), 5.84 (s, 1H), 7.88-7.99 (m, 4H);  $\delta_C$  (75 MHz;  $\text{DMSO-d}_6$ ;  $\text{Me}_4\text{Si}$ ):  $\delta$  19.6, 20.1, 27.7, 35.3, 35.5, 54.0, 86.7, 109.8, 113.1, 123.3, 123.5, 135.9, 136.2, 140.6, 140.7, 166.3, 169.8, 193.9, 195.6, 195.8; HRMS (ESI-TOF)  $m/z$  Calcd for  $[\text{C}_{20}\text{H}_{14}\text{N}_2\text{O}_6+\text{H}]^+$ : 379.0925, found: 379.0926.

**6a-cyano-1',3',5-trioxo-1,1',3',4,5,6a-hexahydro-1aH,3H-spiro[cyclopenta[5,6]pyrano[2,3-b]azirine-6,2'-inden]-1a-yl acetate (2o).** Yield: (0.313g, 86%); Off-white solid; m.p. 216-218 °C; IR (KBr): $\text{cm}^{-1}$ ; 3231, 2935, 2243, 1788, 1751, 1715, 1697, 1649, 1589, 1440, 1373, 1285, 1235, 1158, 1040, 910, 881, 863, 828, 764, 647, 614;  $\delta_H$  (300 MHz;  $\text{DMSO-d}_6$ ;  $\text{Me}_4\text{Si}$ ):  $\delta$  2.16 (s,

3H), 2.29 (s, 1H), 2.38 (s, 1H), 2.57-2.77 (m, 2H), 6.79 (s, 1H), 8.04 (s, 4H);  $\delta_C$  (75 MHz; DMSO- $d_6$ ; Me $_4$ Si):  $\delta$  20.2, 21.1, 26.3, 31.2, 32.7, 34.9, 55.0, 89.2, 101.6, 112.0, 113.5, 120.4, 124.1, 124.3, 132.6, 135.8, 137.7, 138.1, 141.0, 141.2, 166.9, 172.1, 181.2, 188.9, 193.1, 195.3, 200.6, 200.7; HRMS (ESI-TOF)  $m/z$  Calcd for [C $_{19}$ H $_{12}$ N $_2$ O $_6$ +H] $^+$ : 365.0768, found: 365.0774.

**7-(2-chlorophenyl)-7a-cyano-6-oxo-3,4,5,6,7,7a-hexahydrochromeno[2,3-b]azirin-1a(1H)-yl acetate (2p).** Yield: (0.337g, 94%); White solid; m.p. 142-144 °C; IR (KBr):cm $^{-1}$ ; 3217, 2956, 2937, 2244, 1788, 1668, 1626, 1474, 1432, 1372, 1234, 1175, 1102, 1064, 997, 871, 768, 738, 618, 459;  $\delta_H$  (300 MHz; CDCl $_3$ ; Me $_4$ Si):  $\delta$  1.90-1.98 (m, 2H), 2.18 (s, 3H), 2.24 (t,  $J=6.2$  Hz, 2H), 2.36 (s, 1H), 2.50 (t,  $J=5.3$  Hz, 2H), 5.06 (s, 1H), 6.87 (d,  $J=7.5$  Hz, 1H), 7.04-7.16 (m, 2H), 7.38 (d,  $J=7.8$  Hz, 1H);  $\delta_C$  (75 MHz; CDCl $_3$ ; Me $_4$ Si):  $\delta$  19.8, 20.1, 27.5, 34.4, 35.2, 36.5, 87.8, 110.6, 115.6, 126.2, 128.5, 128.8, 129.4, 133.7, 134.3, 165.5, 166.9, 195.1; HRMS (ESI-TOF)  $m/z$  Calcd for [C $_{18}$ H $_{15}$ ClN $_2$ O $_4$ +H] $^+$ : 359.0793, found: 359.0799.

**7a-cyano-7-(furan-2-yl)-6-oxo-7a,8-dihydro-6H-chromeno[3',4':5,6]pyrano[2,3-b]azirin-8a(7H)-yl acetate (2q).** Yield: (0.313g, 86%); Pale yellow solid; m.p. 142-144 °C; IR (KBr):cm $^{-1}$ ; 3251, 2932, 2245, 1781, 1707, 1635, 1611, 1391, 1375, 1158, 1100, 926, 785, 608, 449;  $\delta_H$  (300 MHz; CDCl $_3$ ; Me $_4$ Si):  $\delta$  2.33 (s, 3H), 2.80 (s, 1H), 4.91 (s, 1H), 6.40 (d,  $J=4.1$  Hz, 2H), 7.31-7.36 (m, 2H), 7.40 (s, 1H), 7.60 (t,  $J=7.8$  Hz, 1H), 7.80-7.83 (m, 1H);  $\delta_C$  (75 MHz; CDCl $_3$ ; Me $_4$ Si):  $\delta$  20.4, 34.9, 35.9, 88.3, 98.1, 108.9, 110.9, 113.5, 115.3, 116.8, 122.8, 124.5, 133.1, 143.1, 148.3, 152.6, 154.8, 159.9, 167.3; HRMS (ESI-TOF)  $m/z$  Calcd for [C $_{19}$ H $_{12}$ N $_2$ O $_6$ +Na] $^+$ : 387.0588, found: 387.0623.

**7a-cyano-7-(4-nitrophenyl)-6-oxo-7a,8-dihydro-6H-chromeno[3',4':5,6]pyrano[2,3-b]azirin-8a(7H)-yl acetate (2r).** Yield: (0.377g, 90%); Off-white solid; m.p. 222-224 °C; IR (KBr):cm $^{-1}$ ; 3419, 2924, 2259, 1698, 1634, 1520, 1347, 1164, 1107, 1050, 1025, 758, 504, 450;  $\delta_H$  (300

MHz; mixture of CDCl<sub>3</sub> and DMSO-d<sub>6</sub>; Me<sub>4</sub>Si): δ 2.22 (s, 3H), 4.57 (s, 1H), 5.83 (s, 1H), 7.19-7.28 (m, 2H), 7.43-7.54 (m, 4H), 7.76 (d, *J*=8.1 Hz, 1H), 8.09 (d, *J*=8.7 Hz, 1H); δ<sub>C</sub> (75 MHz; mixture of CDCl<sub>3</sub> and DMSO-d<sub>6</sub>; Me<sub>4</sub>Si): δ 18.9, 25.2, 40.2, 64.9, 93.8, 104.1, 118.3, 120.0, 121.3, 127.8, 128.3, 129.3, 134.0, 137.8, 148.8, 152.3, 157.2, 160.4, 164.9, 172.0; HRMS (ESI-TOF) *m/z* Calcd for [C<sub>21</sub>H<sub>13</sub>N<sub>3</sub>O<sub>7</sub>+H]<sup>+</sup>: 420.0826, found: 420.0832.

**7a-cyano-7-(4-nitrophenyl)-6-oxo-3,4,5,6,7,7a-hexahydrochromeno[2,3-b]azirin-1a(1H)-yl cyclohexanecarboxylate (3a)**; Yield: (0.175g, 40%); White solid; m.p. 208 °C; IR (KBr):cm<sup>-1</sup>; 3310, 2942, 2921, 2854, 2247, 1773, 1663, 1643, 1515, 1370, 1348, 1169, 1095, 731, 525; δ<sub>H</sub> (300 MHz; DMSO-d<sub>6</sub>; Me<sub>4</sub>Si): δ 1.27-2.58 (m, 17H), 4.51 (s, 1H), 5.91 (s, 1H), 7.49 (d, *J*=8.4 Hz, 2H), 8.19 (d, *J*=8.1 Hz, 2H) ; δ<sub>C</sub> (75 MHz; DMSO-d<sub>6</sub>; Me<sub>4</sub>Si): δ 20.3, 24.7, 24.9, 25.5, 28.0, 28.3, 28.7, 35.6, 36.9, 41.8, 88.3, 109.4, 116.2, 123.8, 129.6, 146.4, 147.2, 166.7, 172.5, 196.1; Anal. Calcd for C<sub>23</sub>H<sub>23</sub>N<sub>3</sub>O<sub>6</sub>: C 63.15; H 5.30; N 9.61%. Found: C 63.12; H 5.32; N 9.64%.

**7a-cyano-7-(4-nitrophenyl)-6-oxo-3,4,5,6,7,7a-hexahydrochromeno[2,3-b]azirin-1a(1H)-yl 2-phenylacetate (3b)**. Yield: (0.111g, 25%); White solid; m.p. 204-206 °C; IR (KBr):cm<sup>-1</sup>; 3114, 2956, 2243, 1788, 1653, 1632, 1515, 1375, 1347, 1236, 1091, 995, 706, 526; δ<sub>H</sub> (300 MHz; DMSO-d<sub>6</sub>; Me<sub>4</sub>Si): δ 2.02 (s, 2H), 2.27-2.55 (m, 5H), 3.83 (s, 2H), 4.41 (s, 1H), 7.30-7.39 (m, 7H), 8.17 (d, *J*=8.7 Hz, 2H); δ<sub>C</sub> (75 MHz; DMSO-d<sub>6</sub>; Me<sub>4</sub>Si): δ 15.3, 23.2, 31.5, 32.0, 34.5, 35.6, 83.3, 104.8, 110.6, 119.1, 123.1, 124.05, 124.1, 124.6, 126.6, 139.5, 142.7, 161.4, 163.4, 191.0; Anal. Calcd for C<sub>24</sub>H<sub>19</sub>N<sub>3</sub>O<sub>6</sub>: C 64.72; H 4.30; N 9.43%. Found: C 64.74; H 4.32; N 9.40%.

**7a-cyano-7-(4-nitrophenyl)-6-oxo-3,4,5,6,7,7a-hexahydrochromeno[2,3-b]azirin-1a(1H)-yl 2,2-diphenylacetate (3c)**. Yield: (0.115g, 22%); White solid; m.p. 162-164 °C; IR (KBr):cm<sup>-1</sup>; 3138, 2922, 2242, 1781, 1657, 1629, 1237, 1093, 1345, 1237, 1210, 1039, 995, 937, 755, 705, 694, 624, 617; δ<sub>H</sub> (300 MHz; mixture of CDCl<sub>3</sub> and DMSO-d<sub>6</sub>; Me<sub>4</sub>Si): δ 1.96 (d, *J*=6.6 Hz,

2H), 2.24 (t,  $J=6.3$  Hz, 2H), 2.488 (s, 2H), 4.32 (s, 1H), 4.88 (s, 1H), 5.14 (s, 1H), 7.27-7.37 (m, 12H), 8.10 (d,  $J=8.4$  Hz, 2H);  $\delta_C$  (75 MHz; mixture of  $CDCl_3$  and  $DMSO-d_6$ ;  $Me_4Si$ ):  $\delta$  19.9, 27.9, 29.5, 35.3, 36.7, 56.1, 88.4, 109.4, 115.6, 123.4, 127.7, 128.3, 128.4, 128.5, 128.56, 128.6, 128.7, 128.8, 136.7, 145.0, 147.1, 166.3, 169.3, 195.9; Anal. Calcd for  $C_{30}H_{23}N_3O_6$ : C 69.09; H 4.45; N 8.06%. Found: C 69.08; H 4.42; N 8.08%.

**7a-cyano-7-(4-nitrophenyl)-6-oxo-7a,8-dihydro-6H-chromeno[3',4':5,6]pyrano[2,3-b]azirin-8a(7H)-yl cyclohexanecarboxylate (3r).** Yield: (0.171g, 35%); White solid; m.p. 168-170 °C; IR (KBr): $cm^{-1}$ ; 3166, 2936, 2245, 1779, 1706, 1631, 1520, 1384, 1351, 1237, 1166, 1104, 1055, 768, 568;  $\delta_H$  (300 MHz;  $DMSO-d_6$ ;  $Me_4Si$ ):  $\delta$  1.12-1.83 (m, 10H), 2.50 (s, 1H), 4.86 (s, 1H), 6.25 (s, 1H), 7.27-7.57 (m, 5H), 7.66-7.69 (m, 5H), 7.68 (d,  $J=7.8$  Hz, 1H), 8.08 (d,  $J=8.1$  Hz, 2H);  $\delta_C$  (75 MHz;  $DMSO-d_6$ ;  $Me_4Si$ ):  $\delta$  24.7, 24.8, 25.5, 28.3, 28.6, 35.7, 41.8, 89.3, 100.0, 113.7, 115.6, 117.0, 123.1, 124.0, 125.3, 129.9, 131.3, 133.7, 145.1, 147.6, 152.4, 155.3, 160.0, 172.5; HRMS (ESI-TOF)  $m/z$  Calcd for  $[C_{26}H_{21}N_3O_7+Na]^+$ : 510.1272, found: 510.1208. Anal. Calcd for  $C_{26}H_{21}N_3O_7$ : C 64.06; H 4.34; N 8.62%. Found: C 64.04; H 4.32; N 8.64%.

Spectra ( $^1\text{H}$  NMR and  $^{13}\text{C}$  NMR):

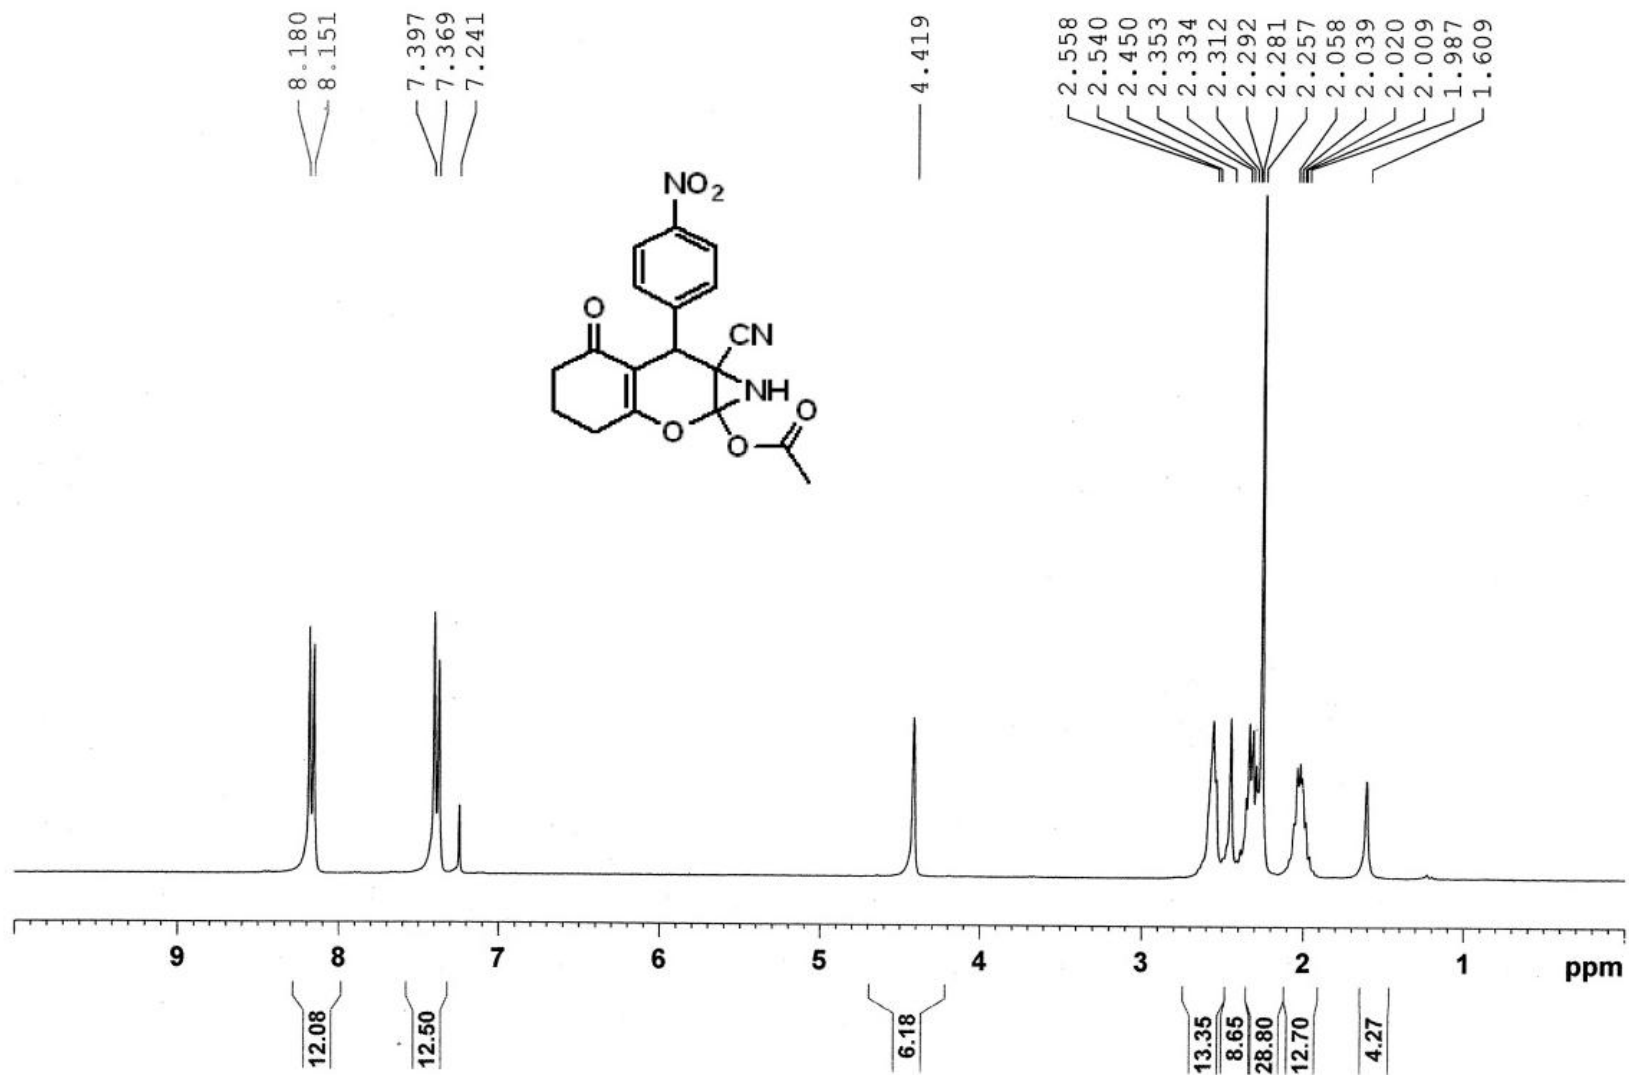

$^1\text{H}$  NMR of 2a

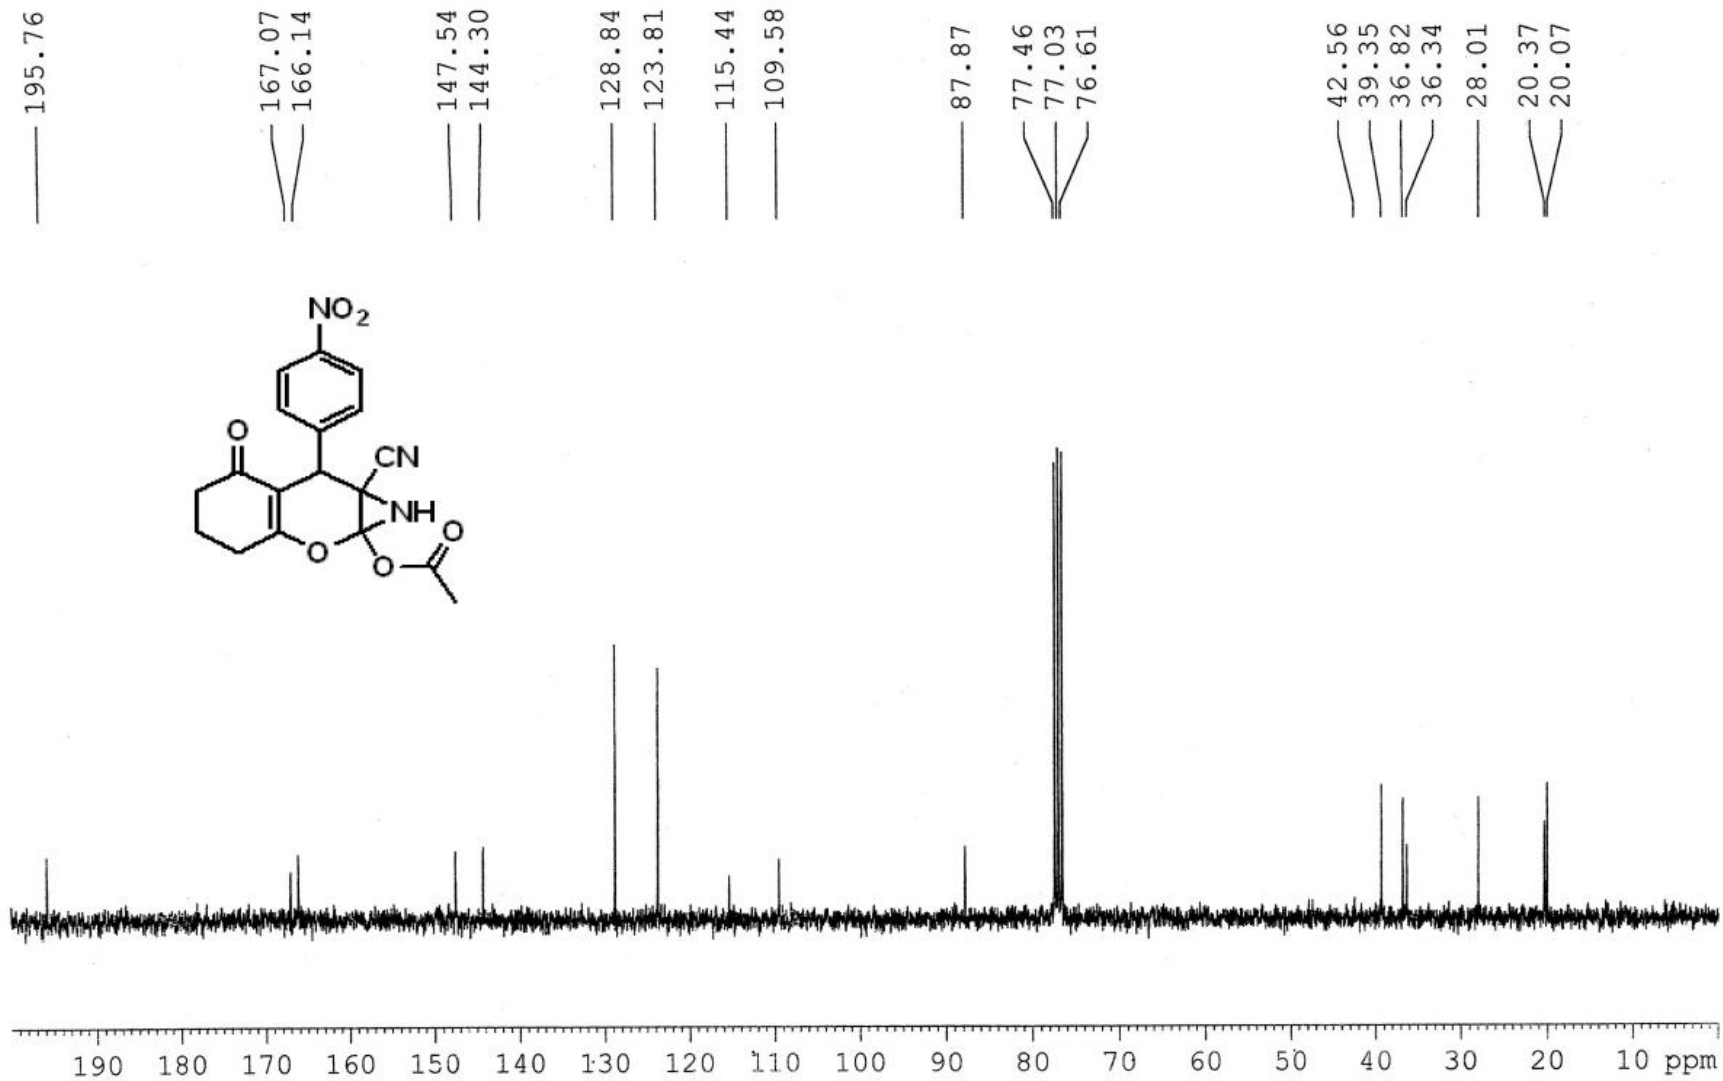

$^{13}\text{C}$  NMR of 2a

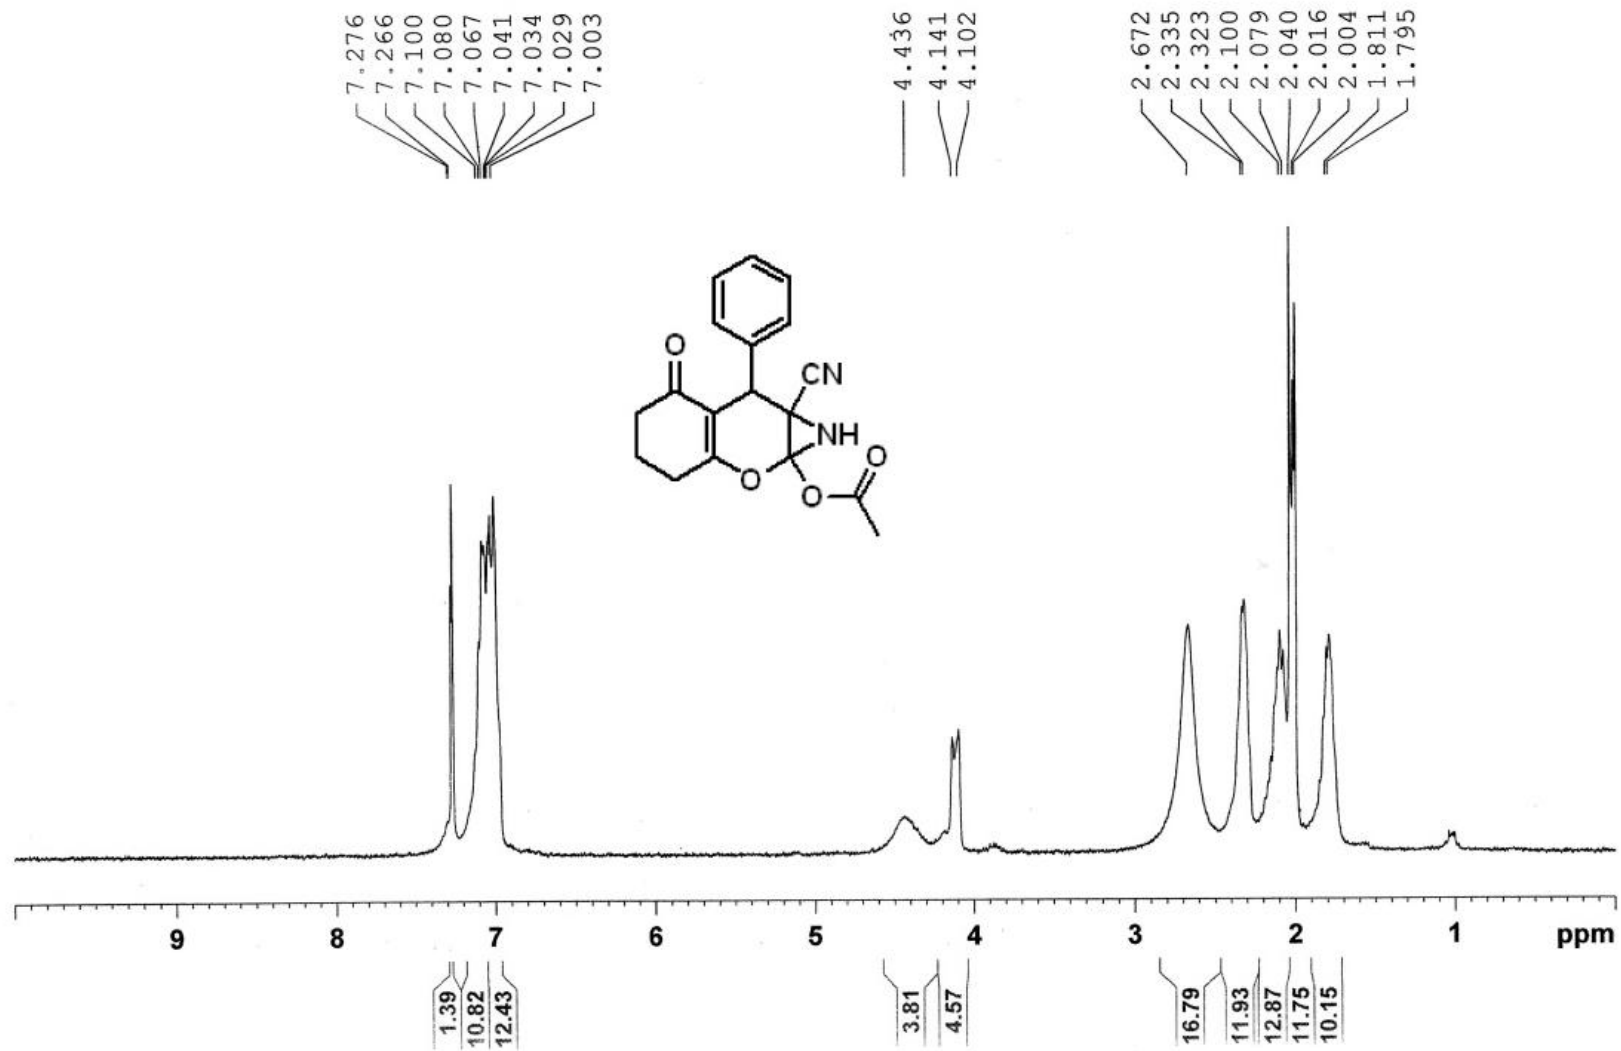

$^1\text{H}$  NMR of 2b

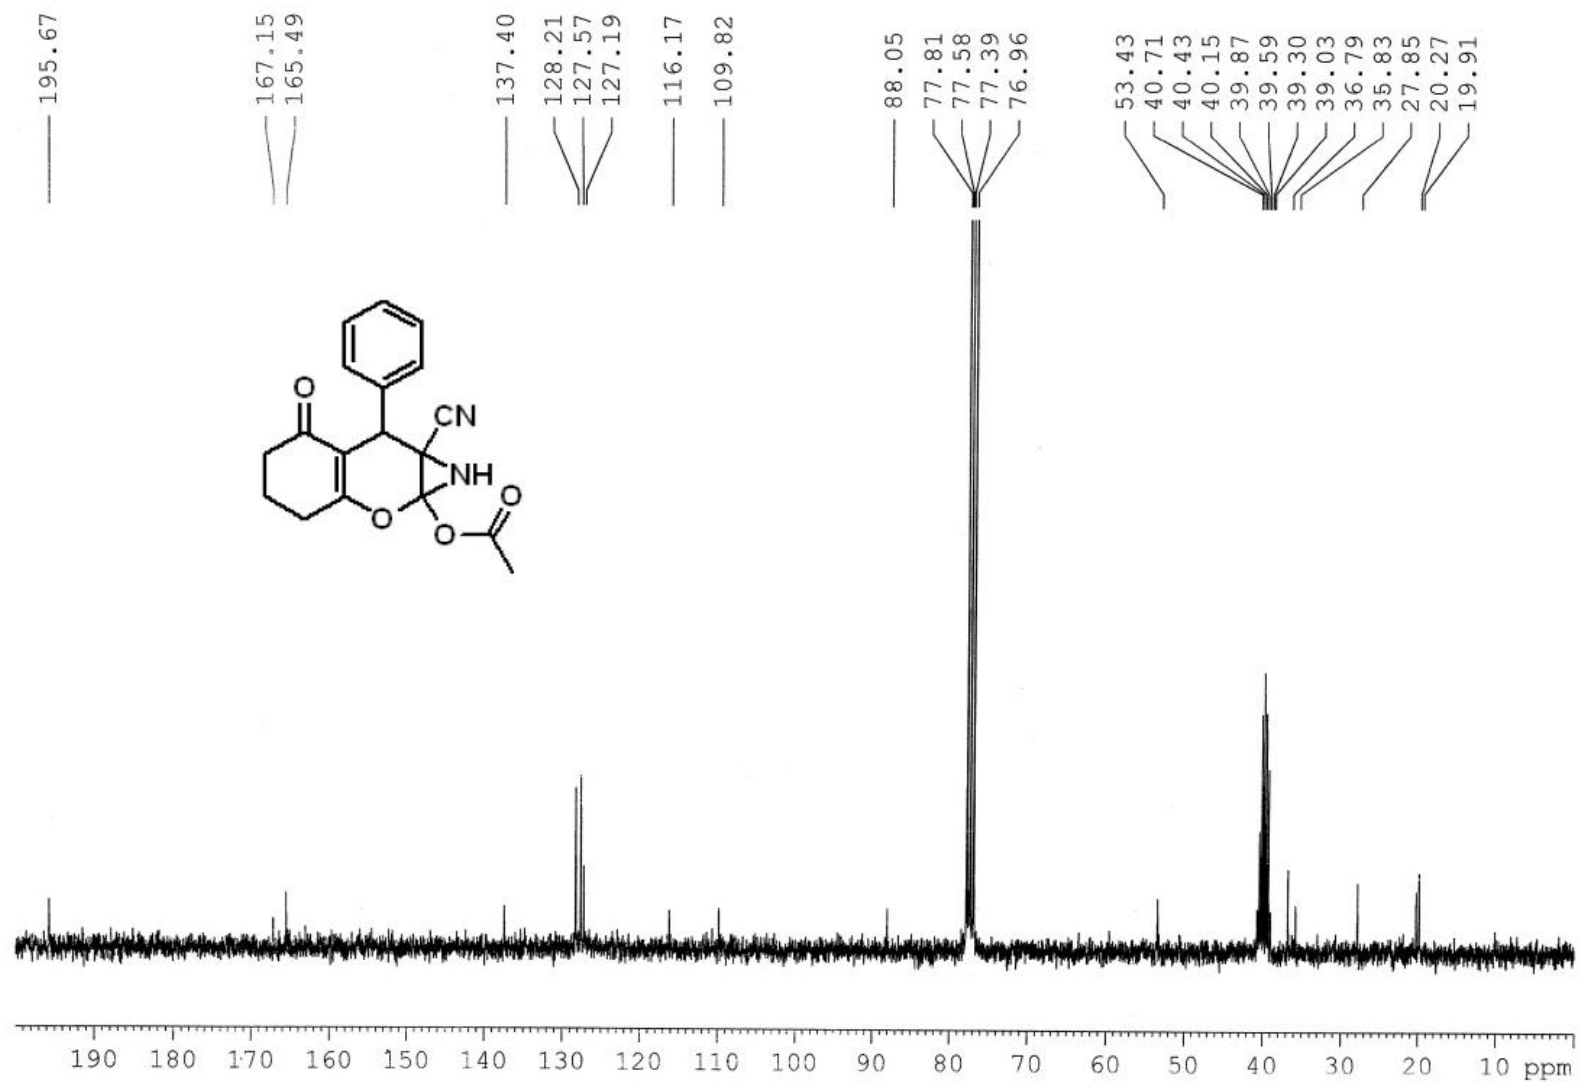

<sup>13</sup>C NMR of 2b



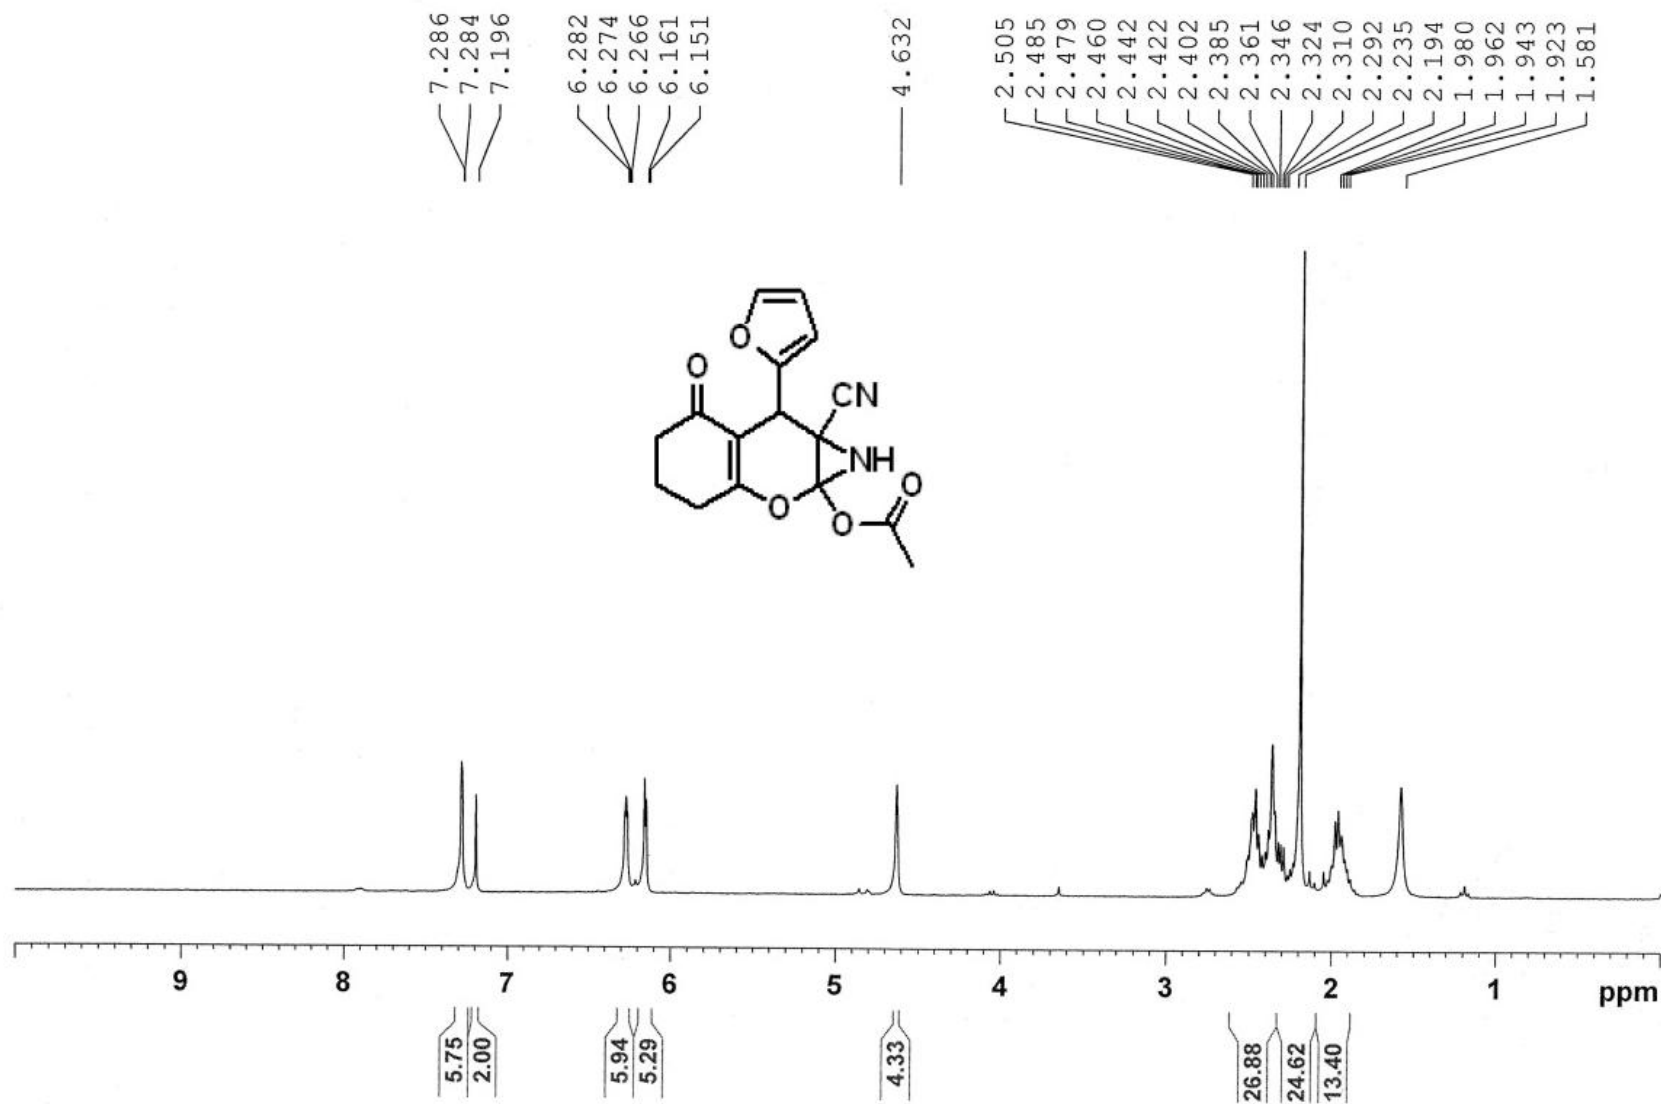

<sup>1</sup>H NMR of 2c

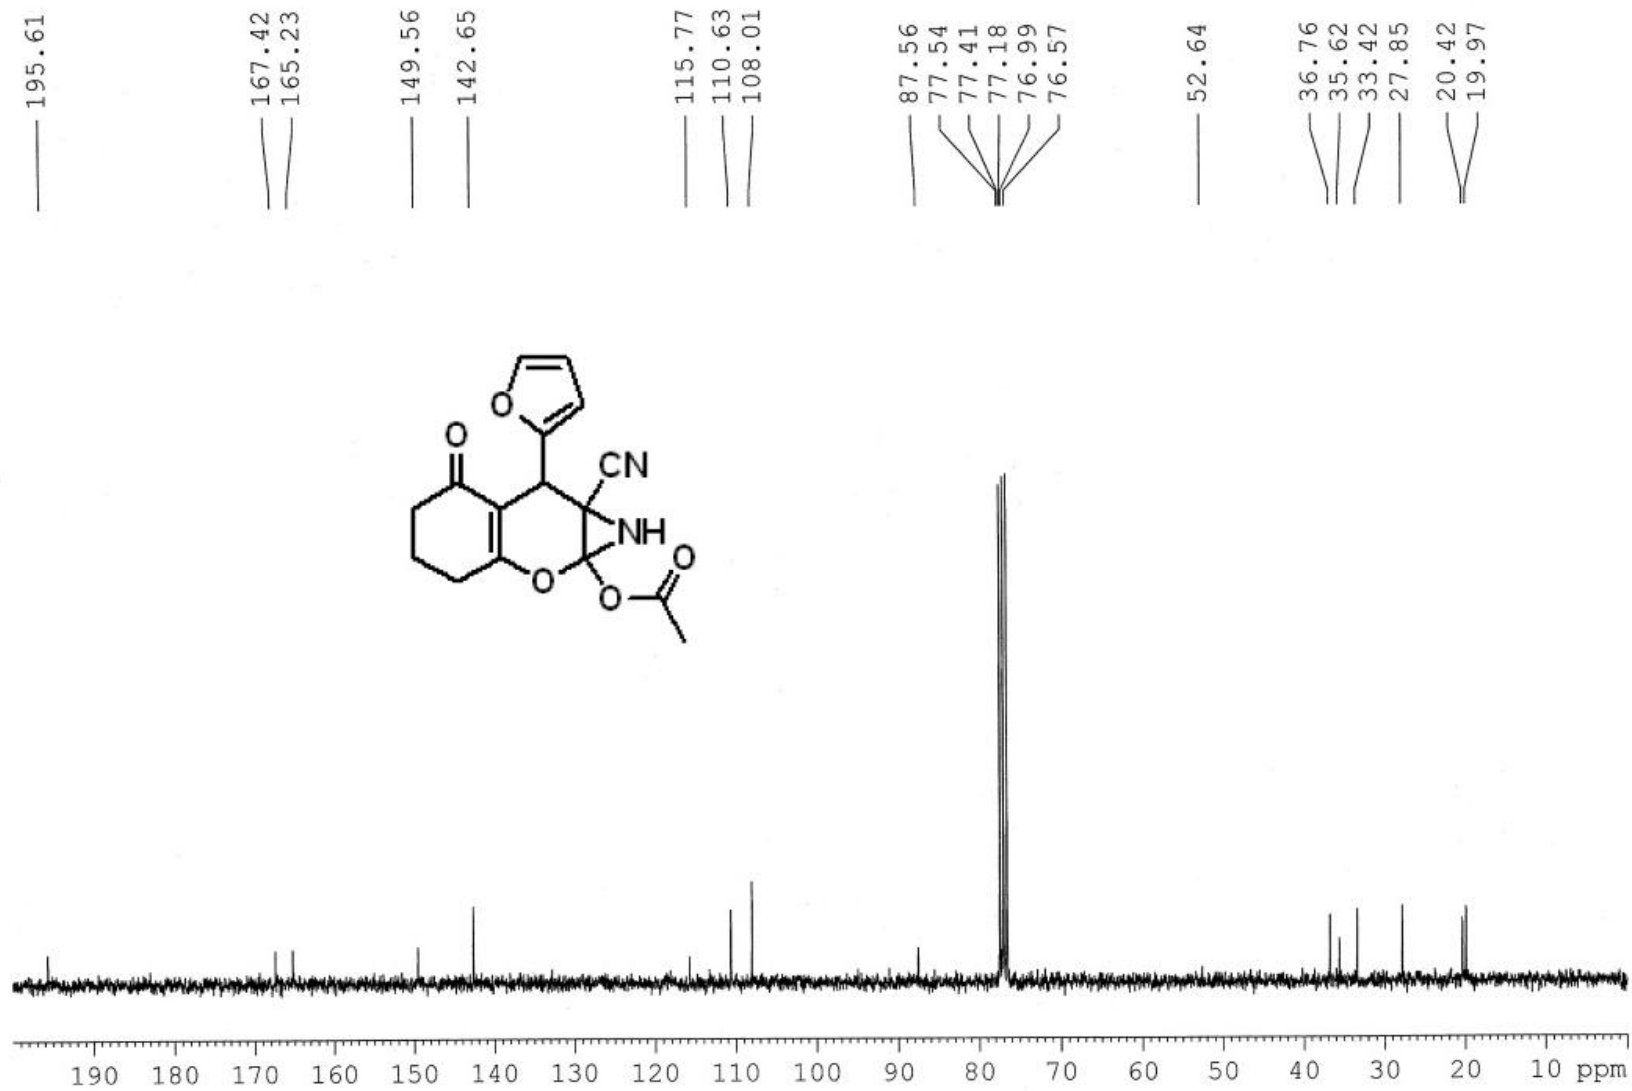

$^{13}\text{C}$  NMR of 2c

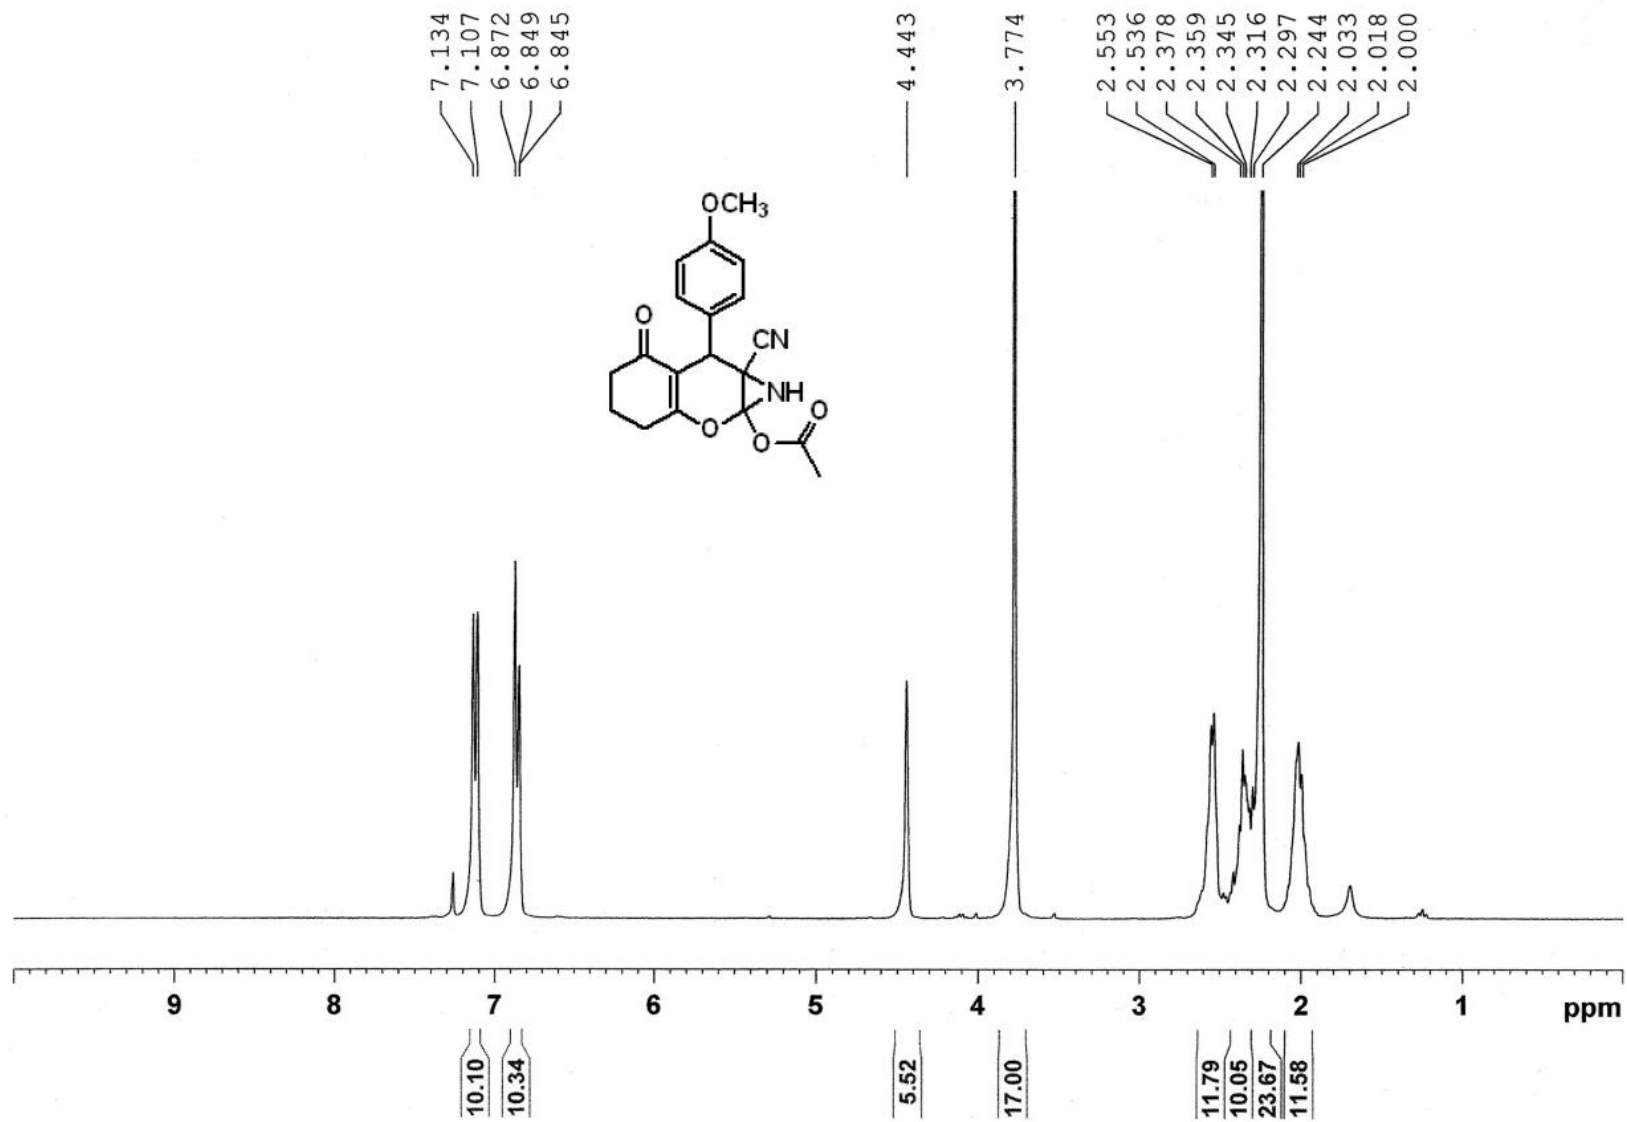

<sup>1</sup>H NMR of 2d

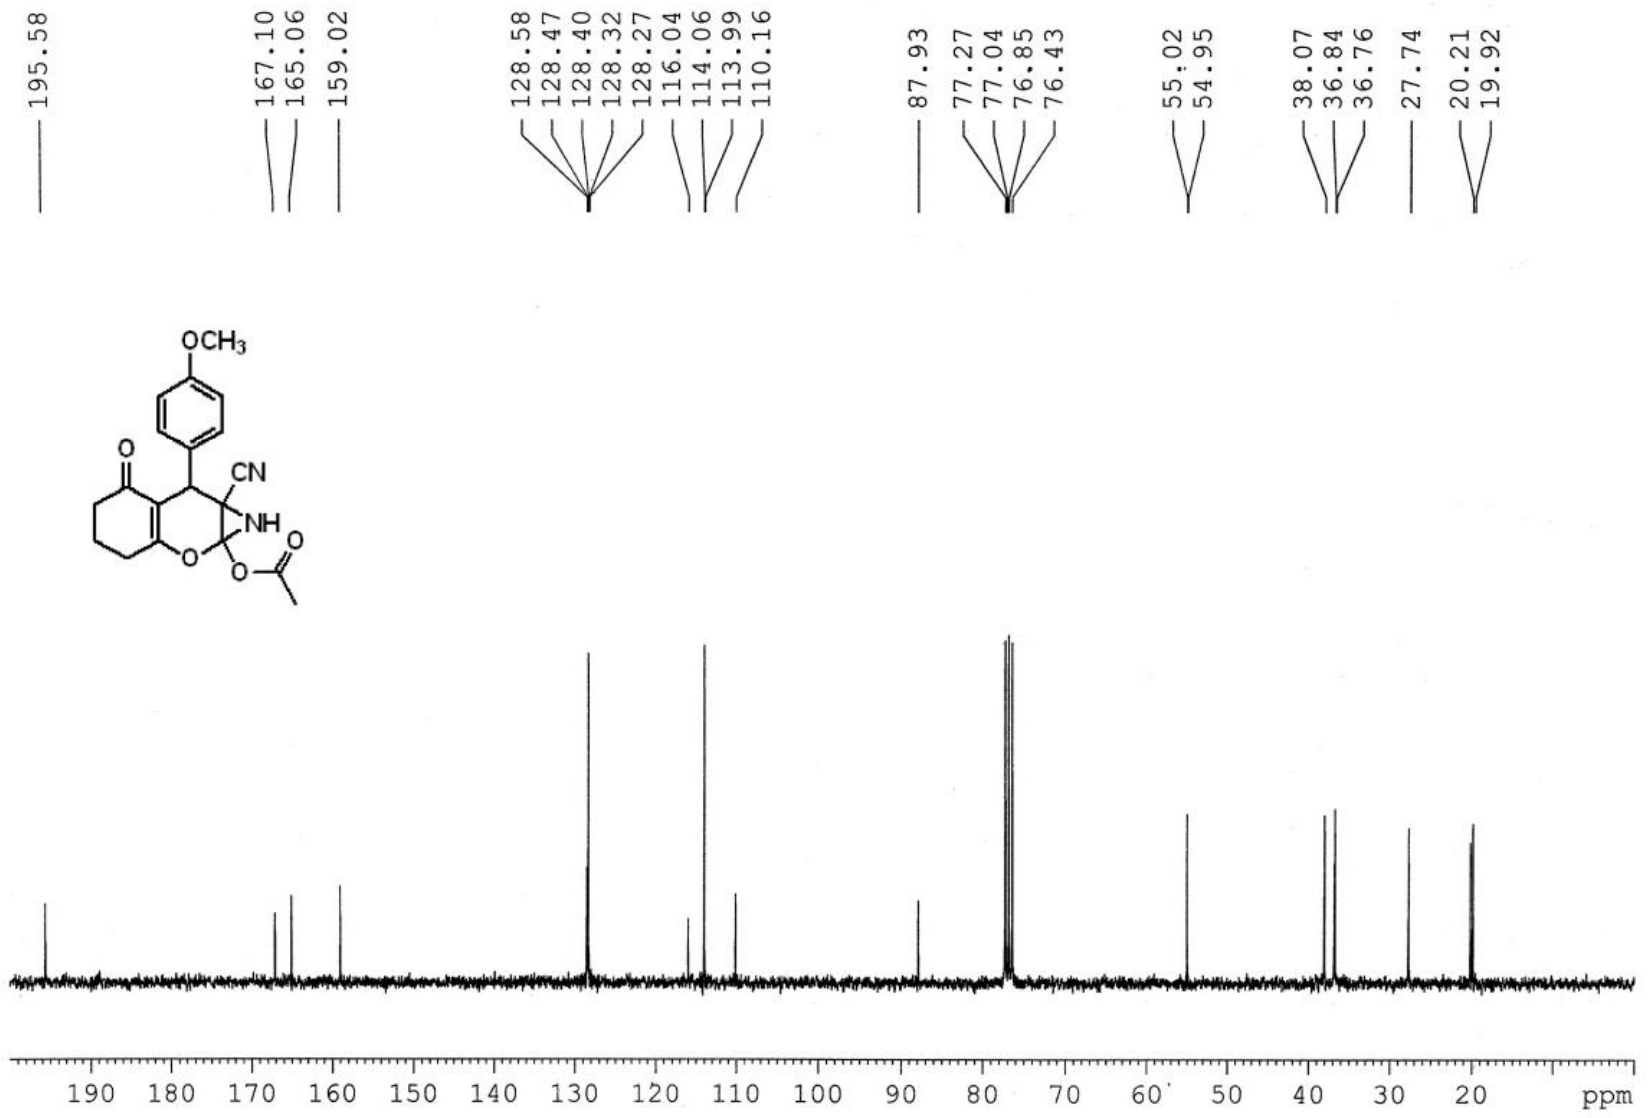

<sup>13</sup>C NMR of 2d

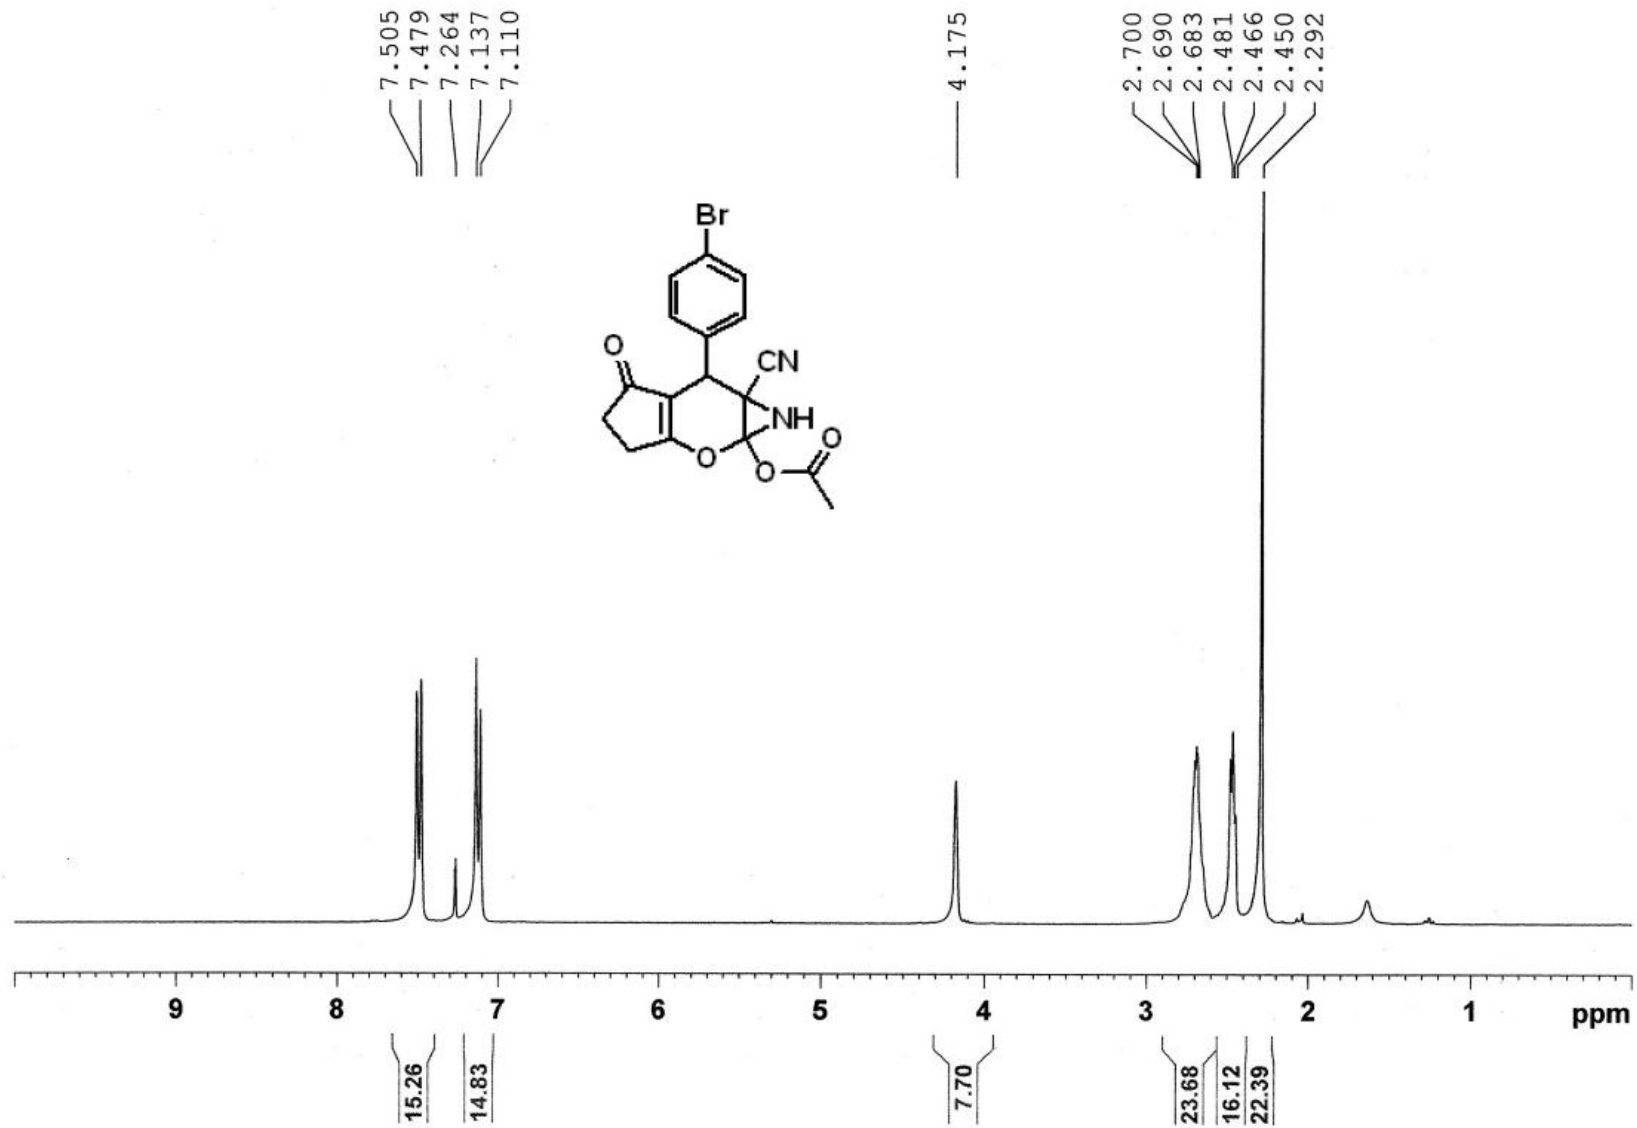

$^1\text{H NMR}$  of 2e

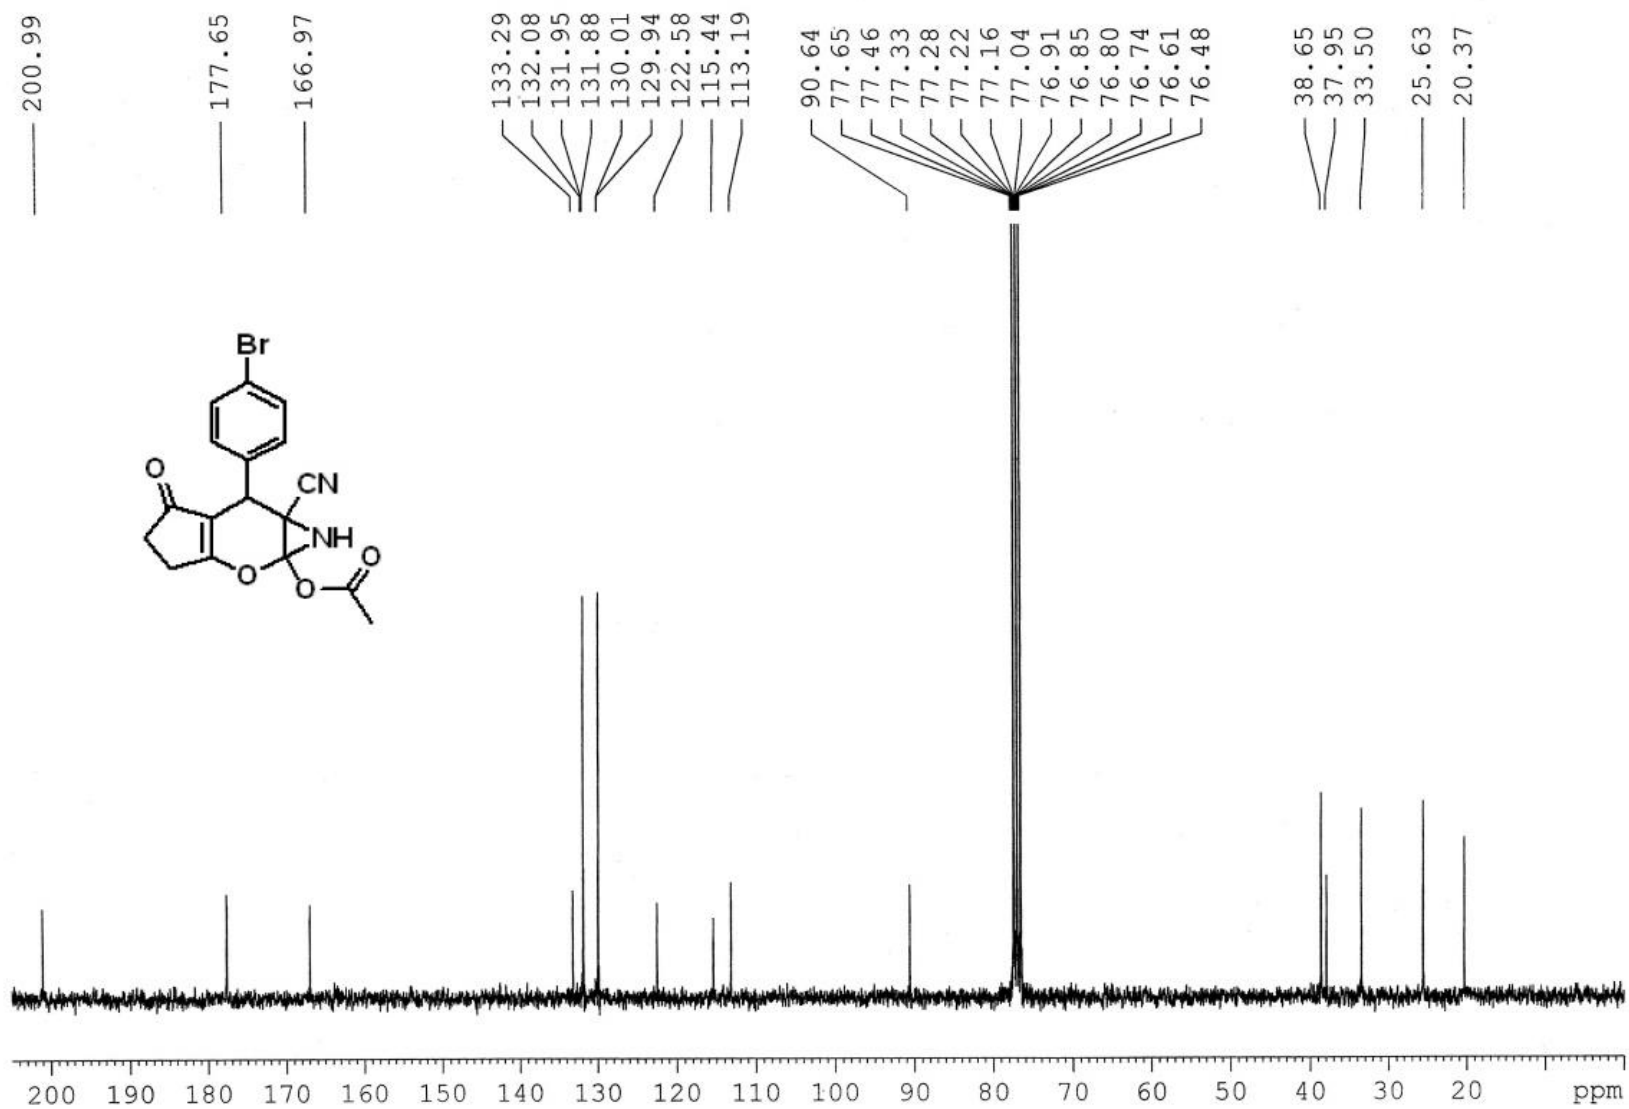

$^{13}\text{C}$  NMR of 2e

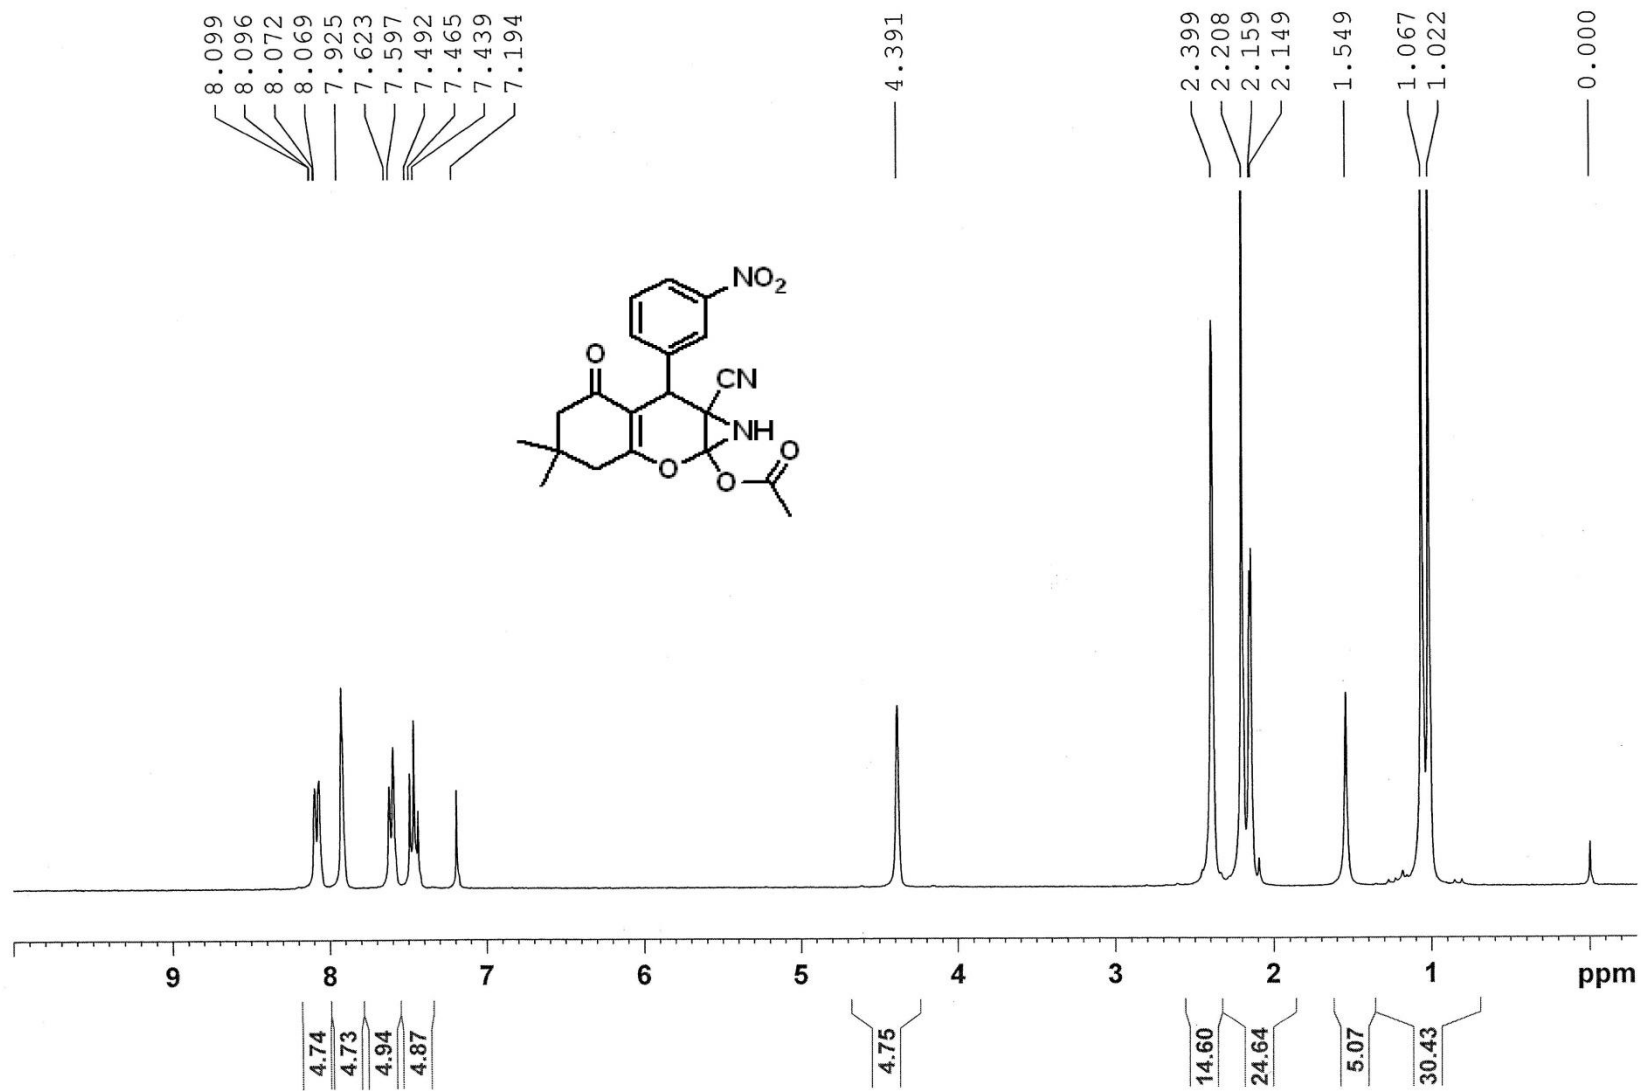

**<sup>1</sup>H NMR of 2f**

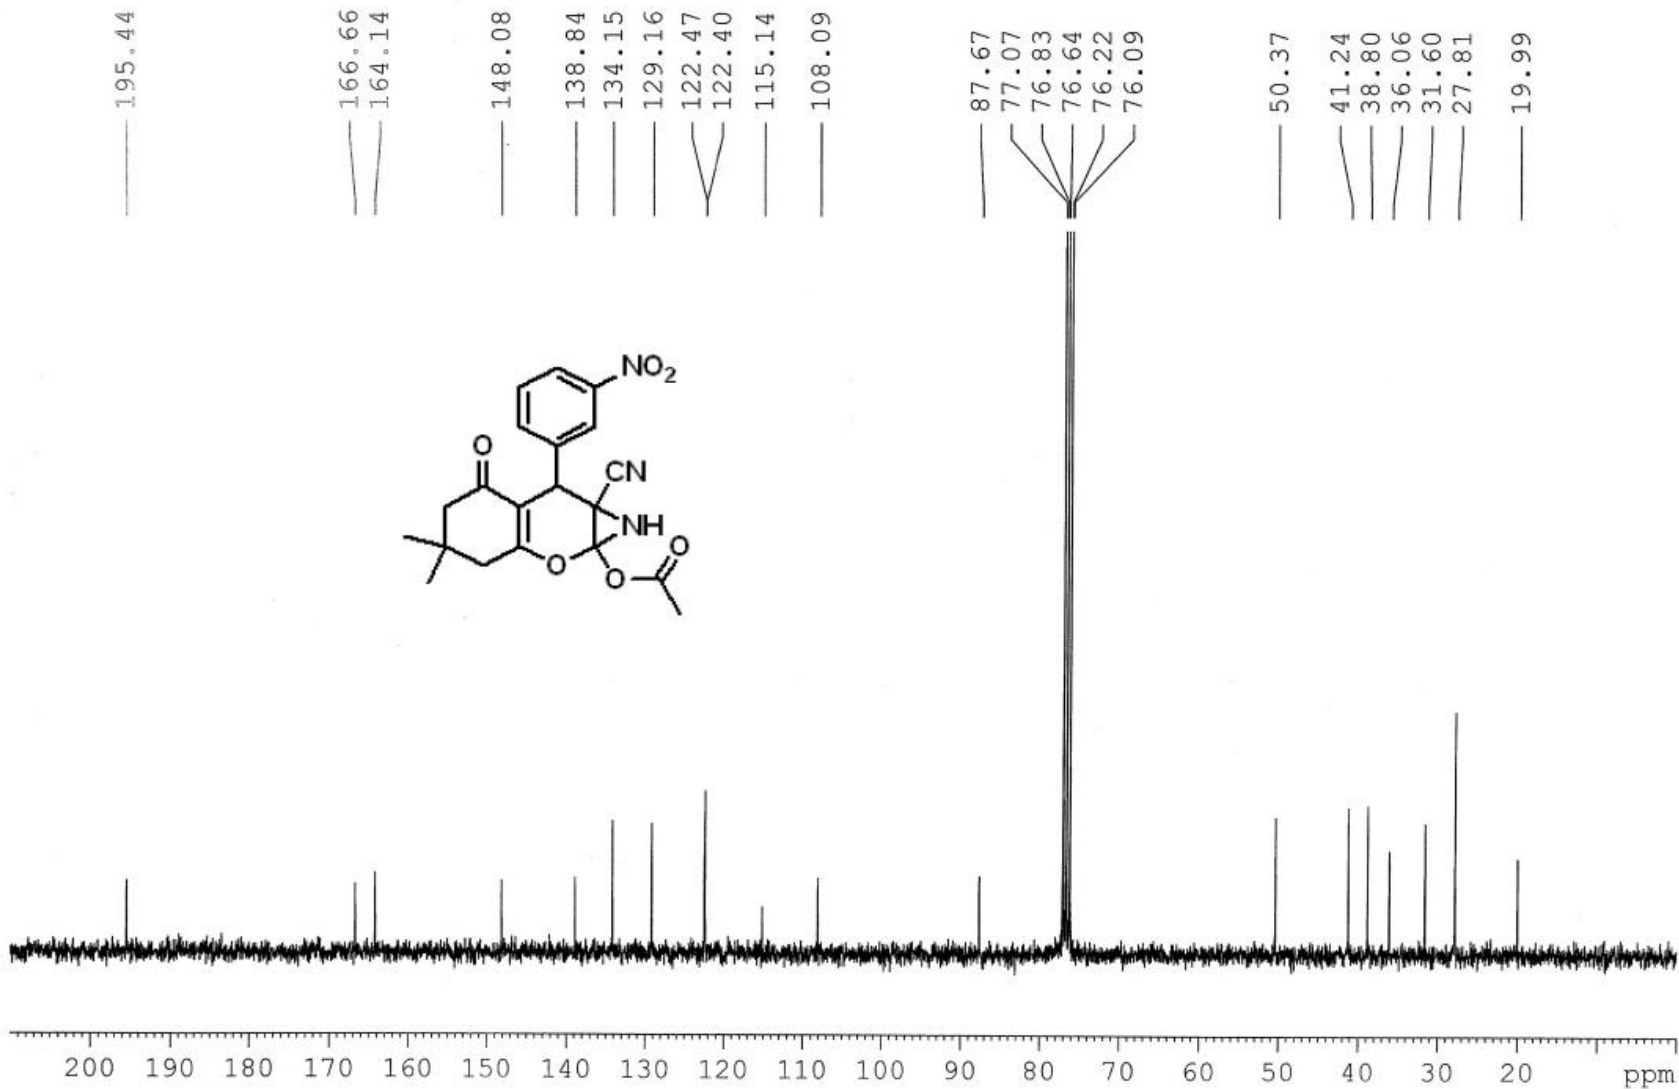

<sup>13</sup>C NMR of 2f



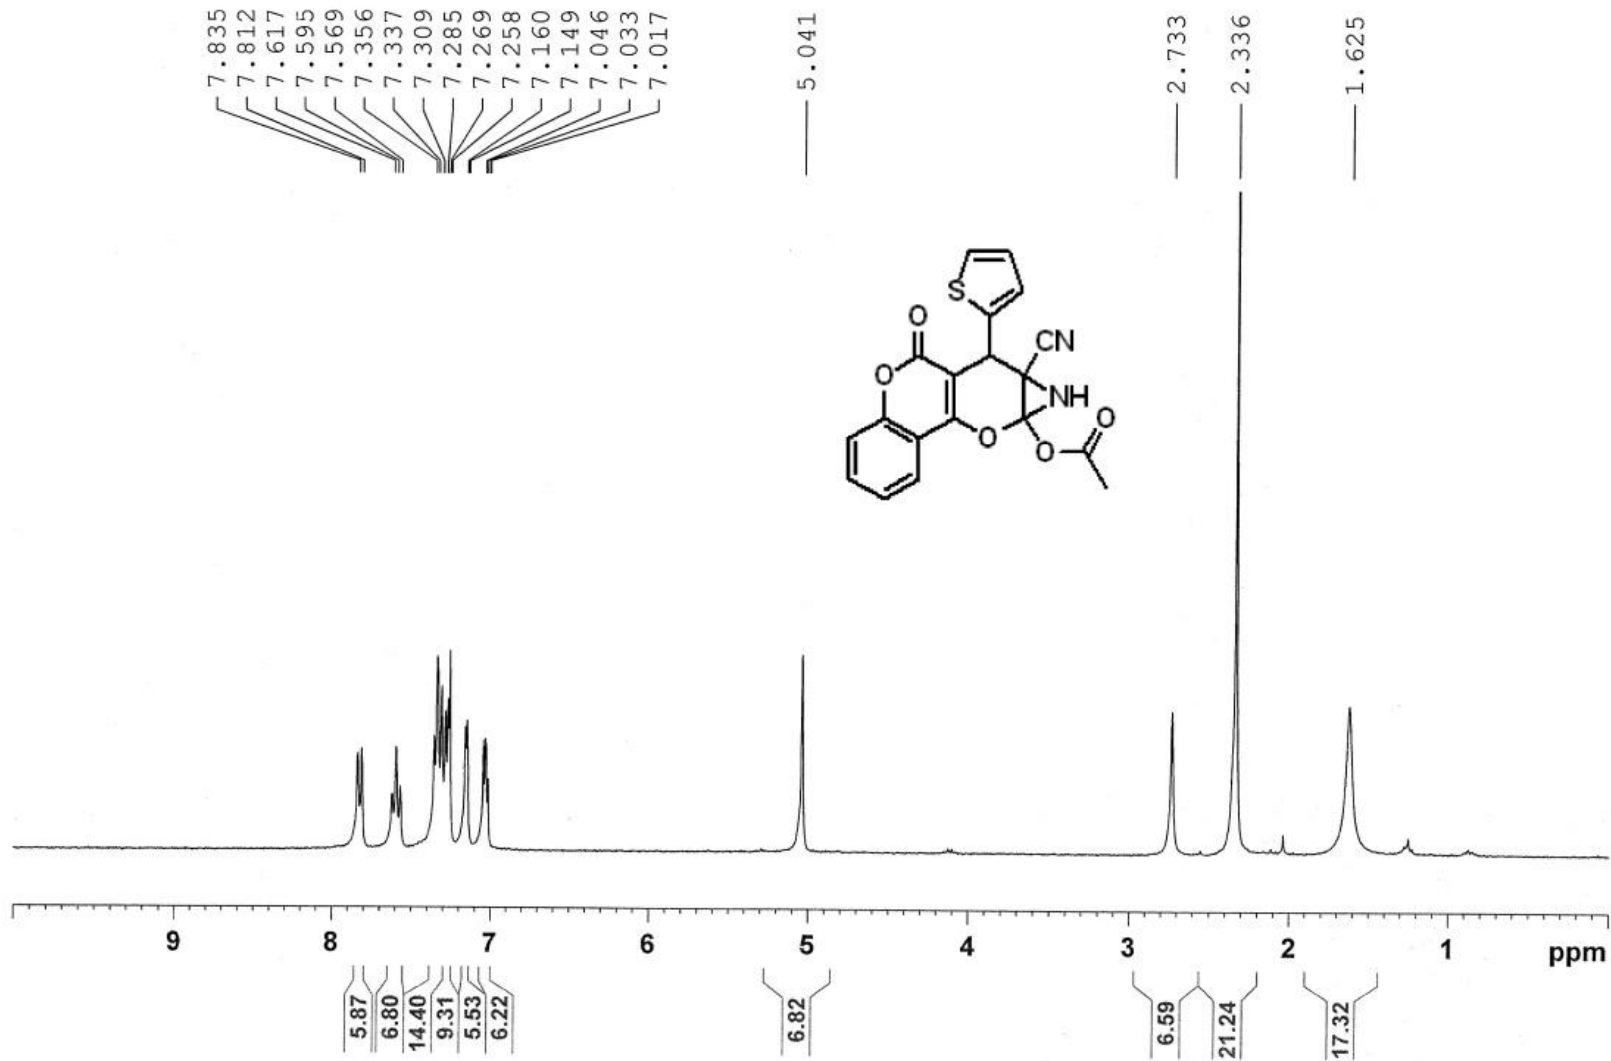

<sup>1</sup>H NMR of 2g

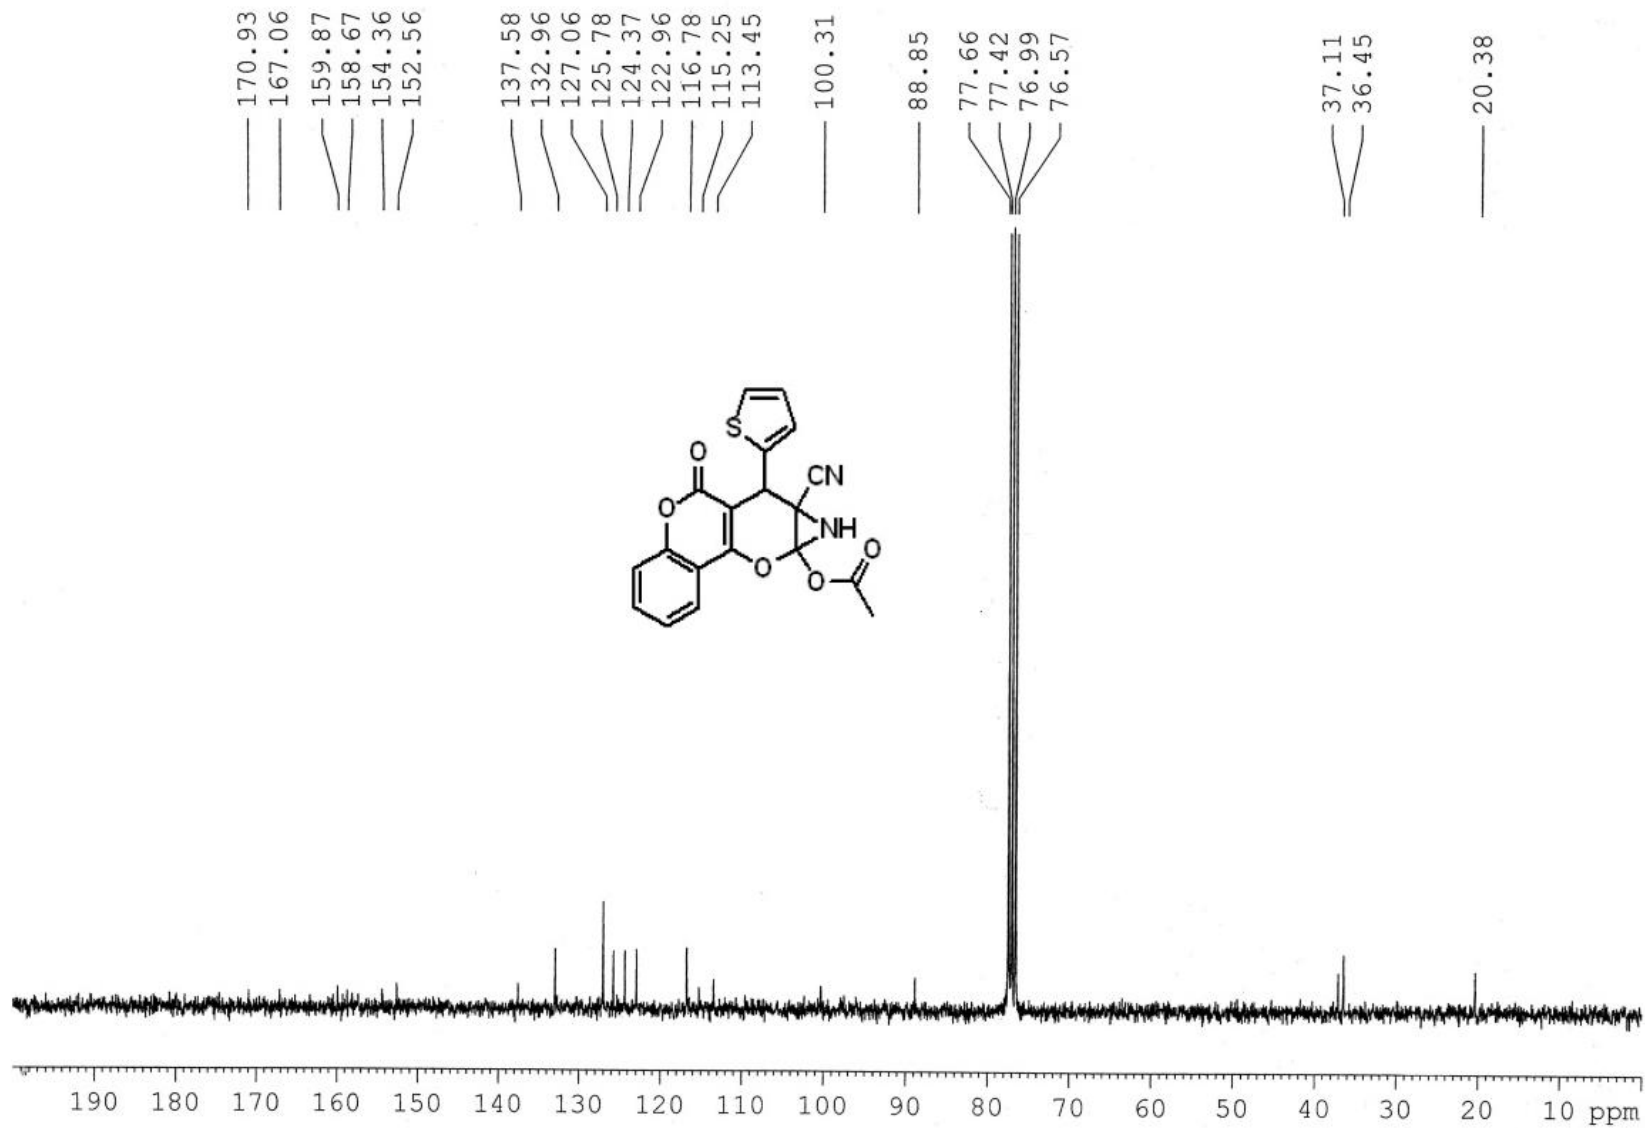

$^{13}\text{C}$  NMR of 2g

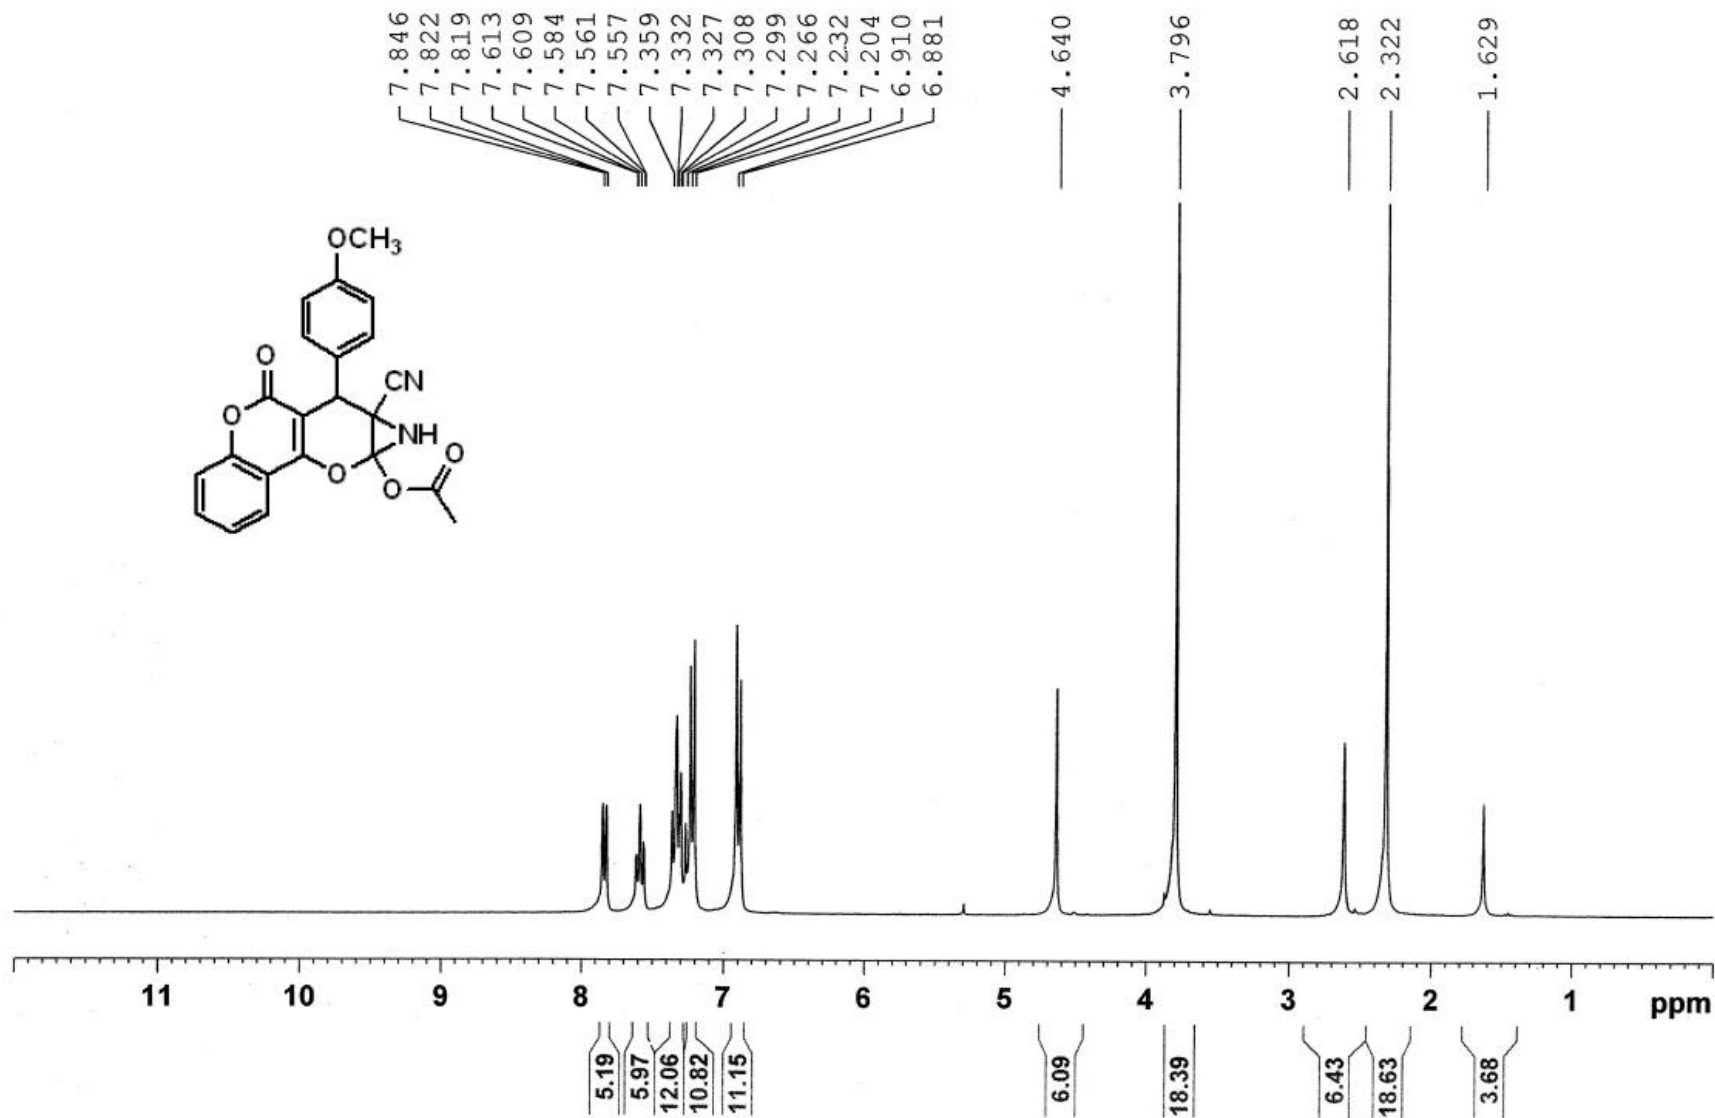

<sup>1</sup>H NMR of 2h



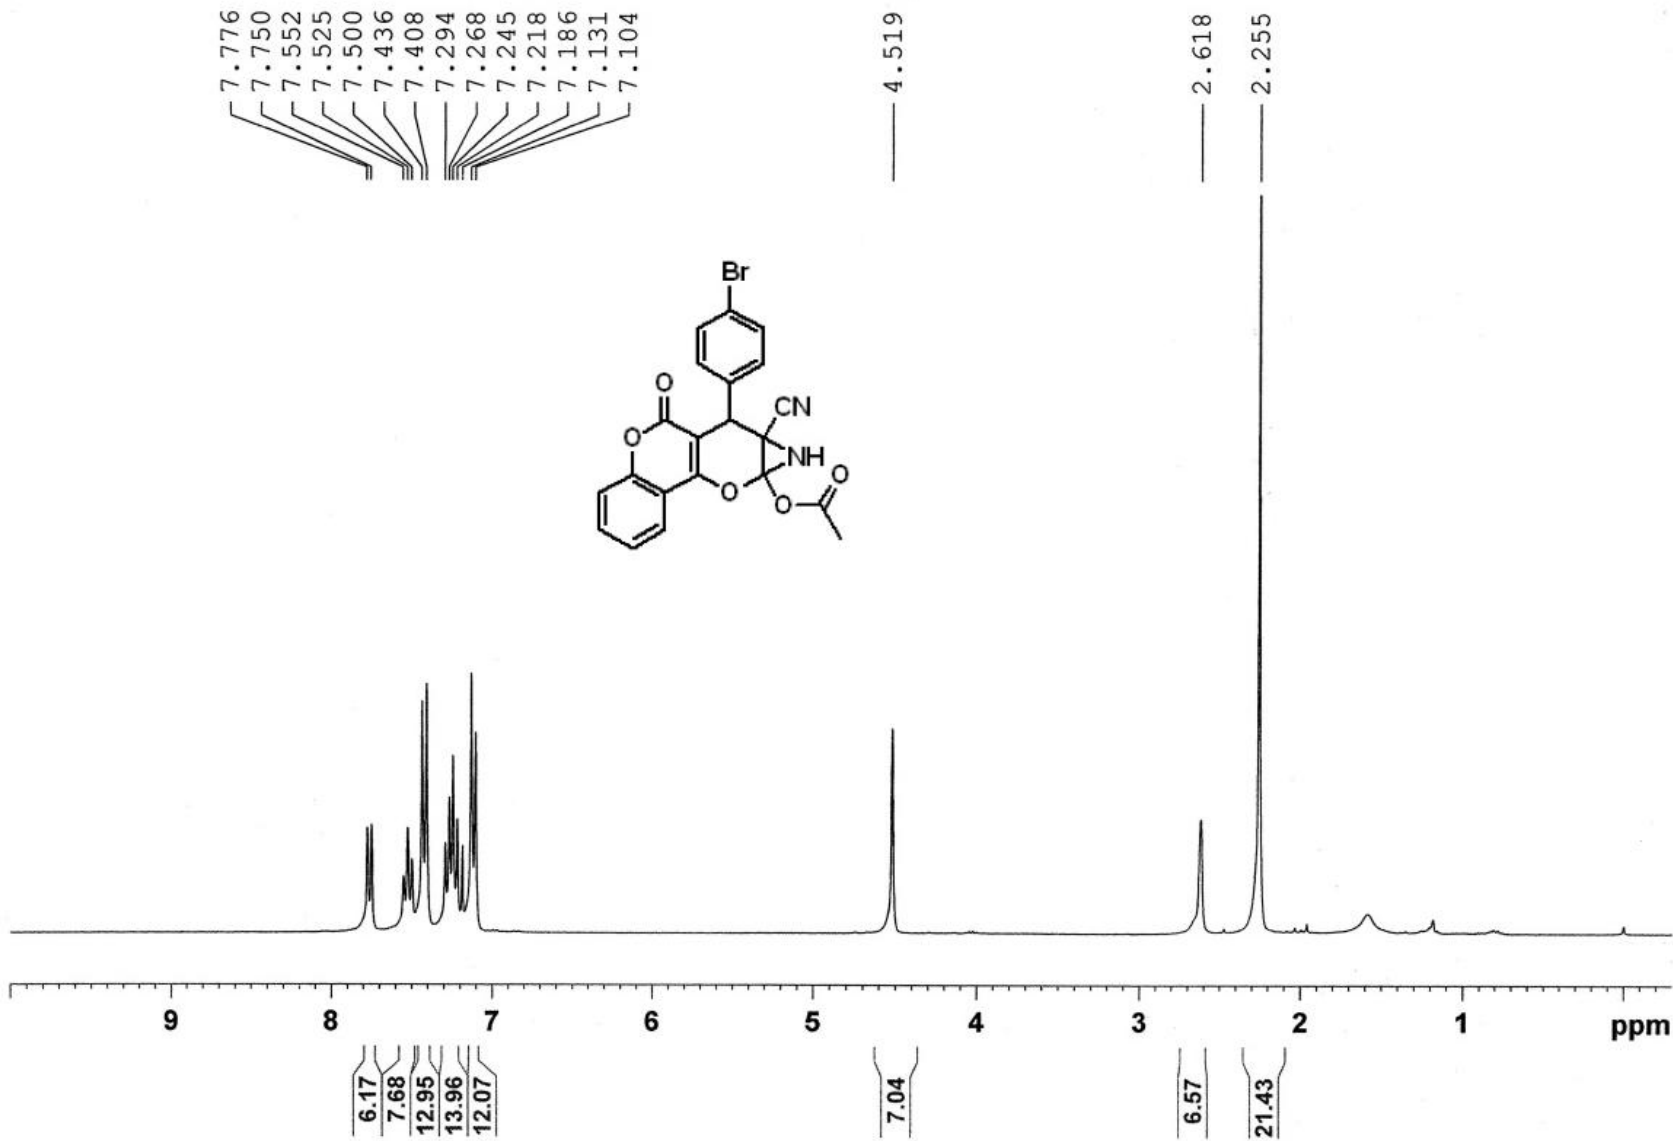

<sup>1</sup>H NMR of 2i

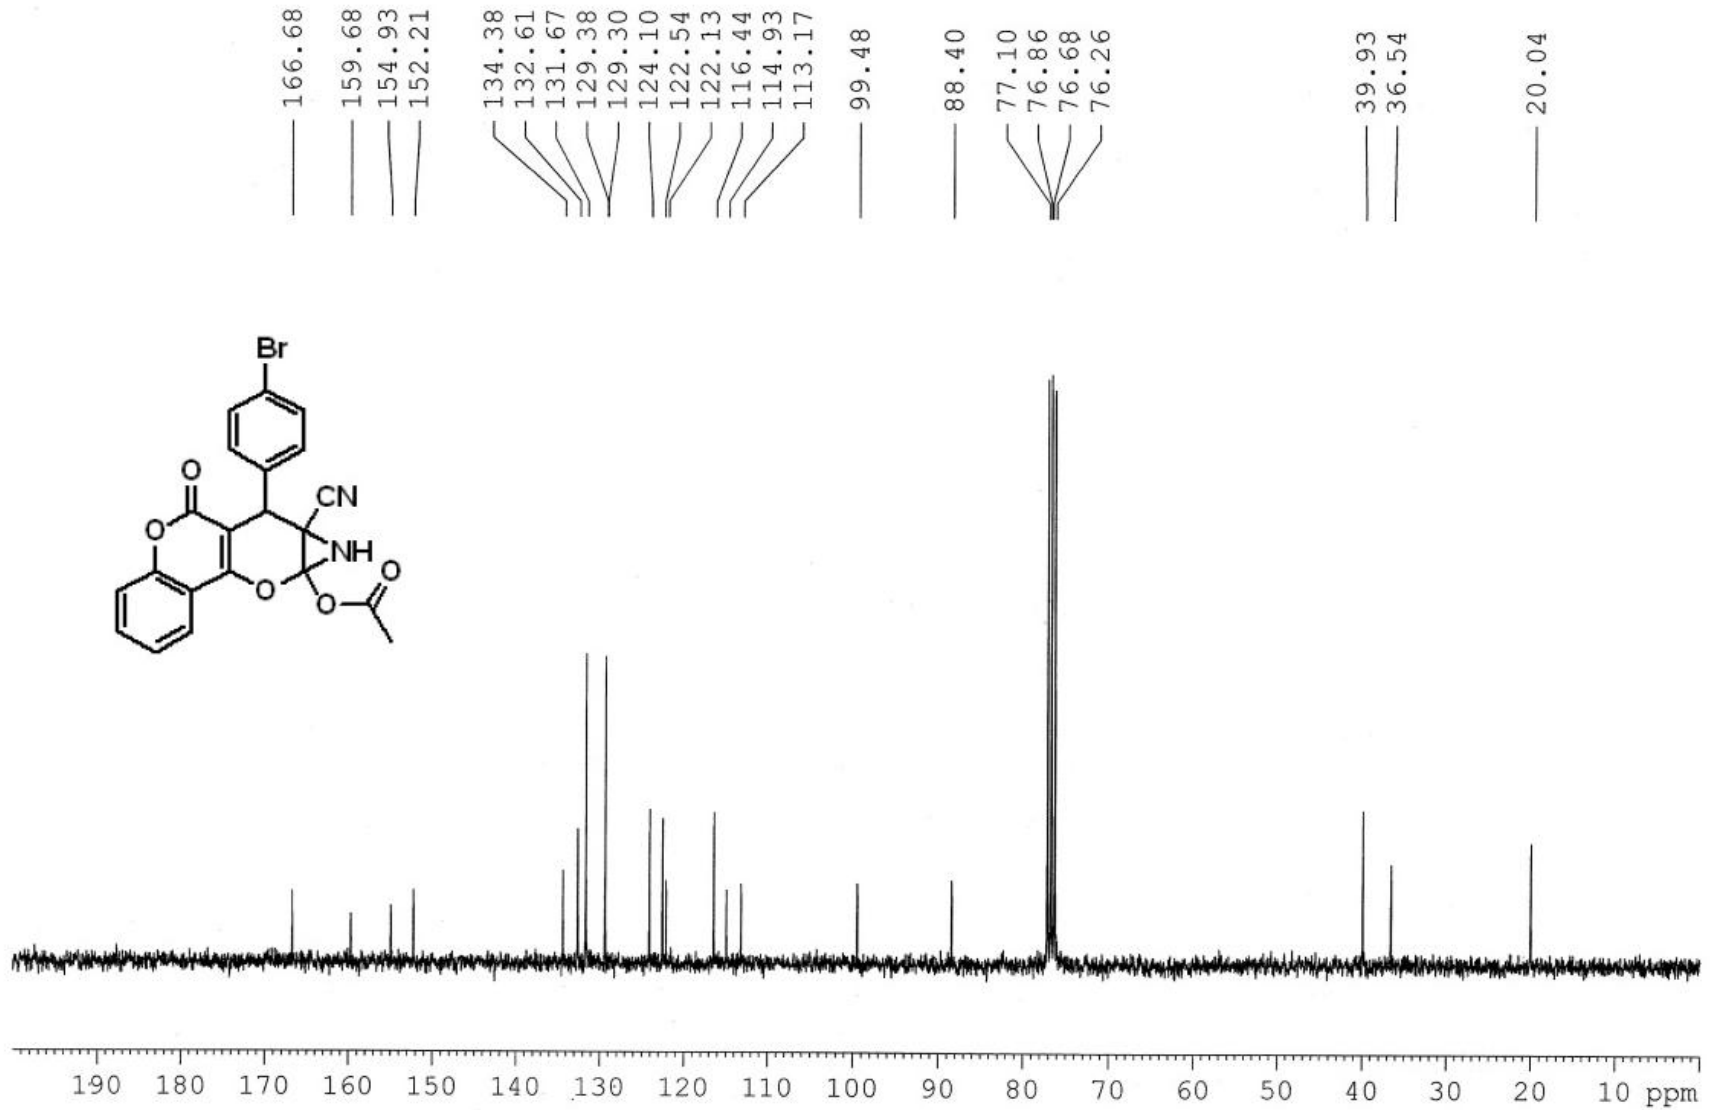

<sup>13</sup>C NMR of 2i

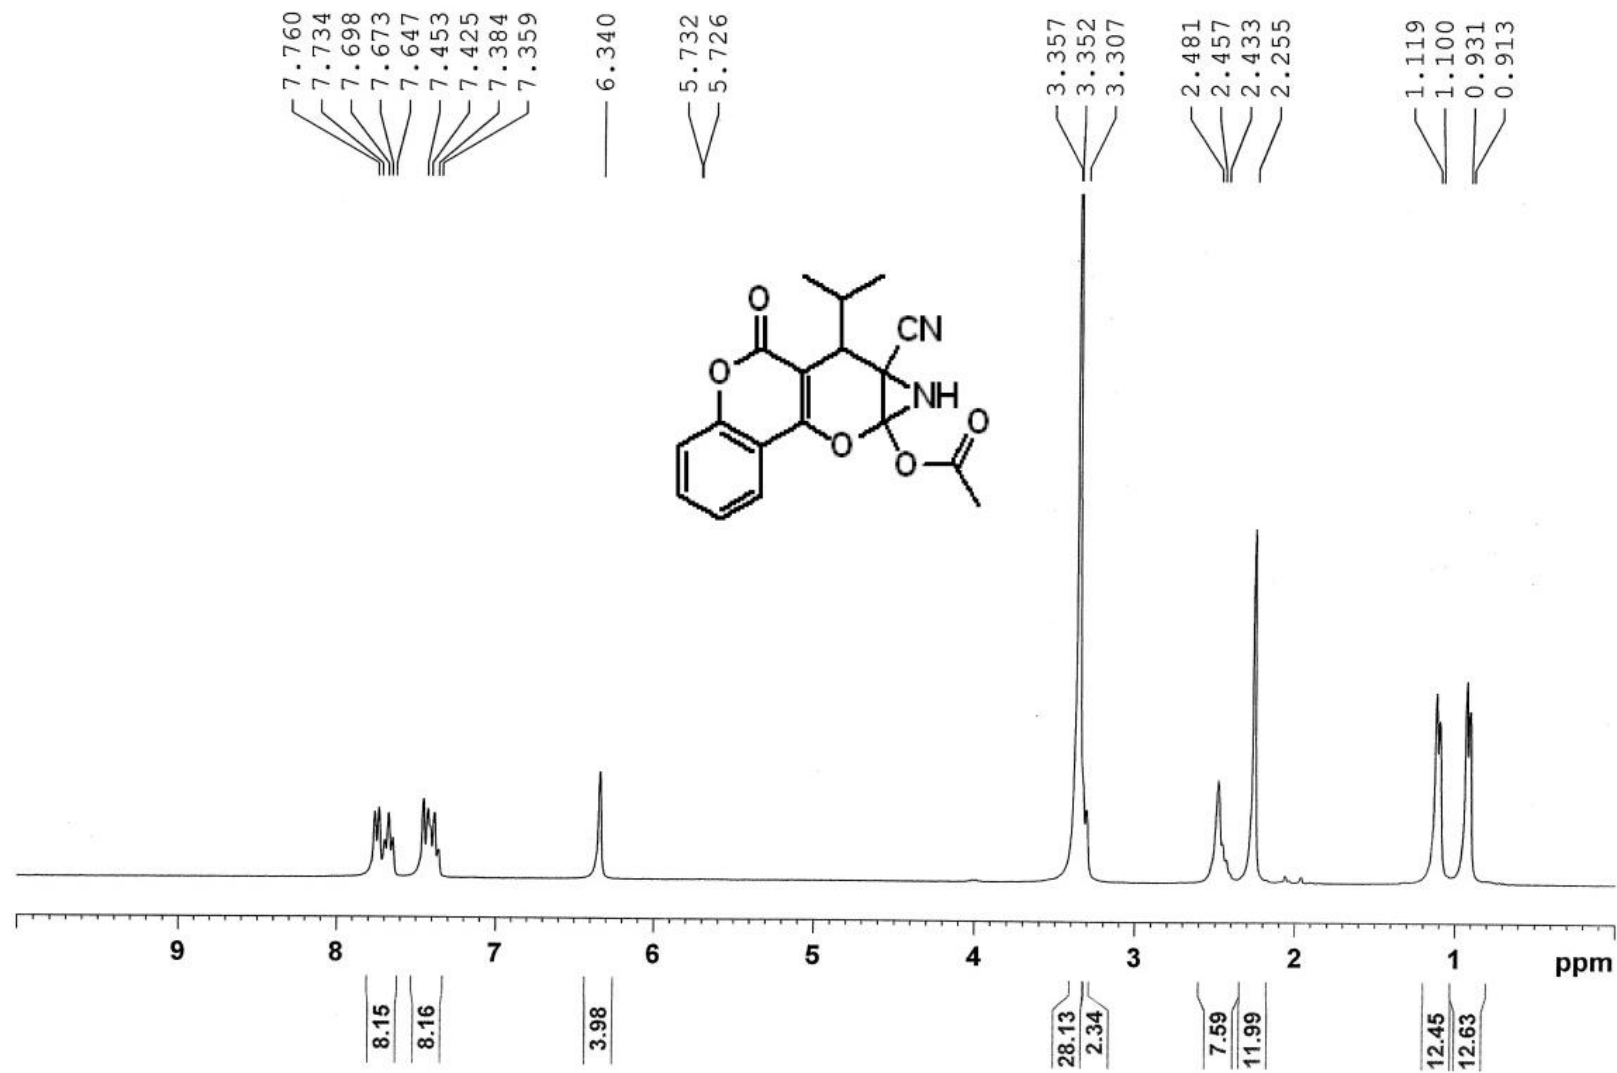

<sup>1</sup>H NMR of 2j

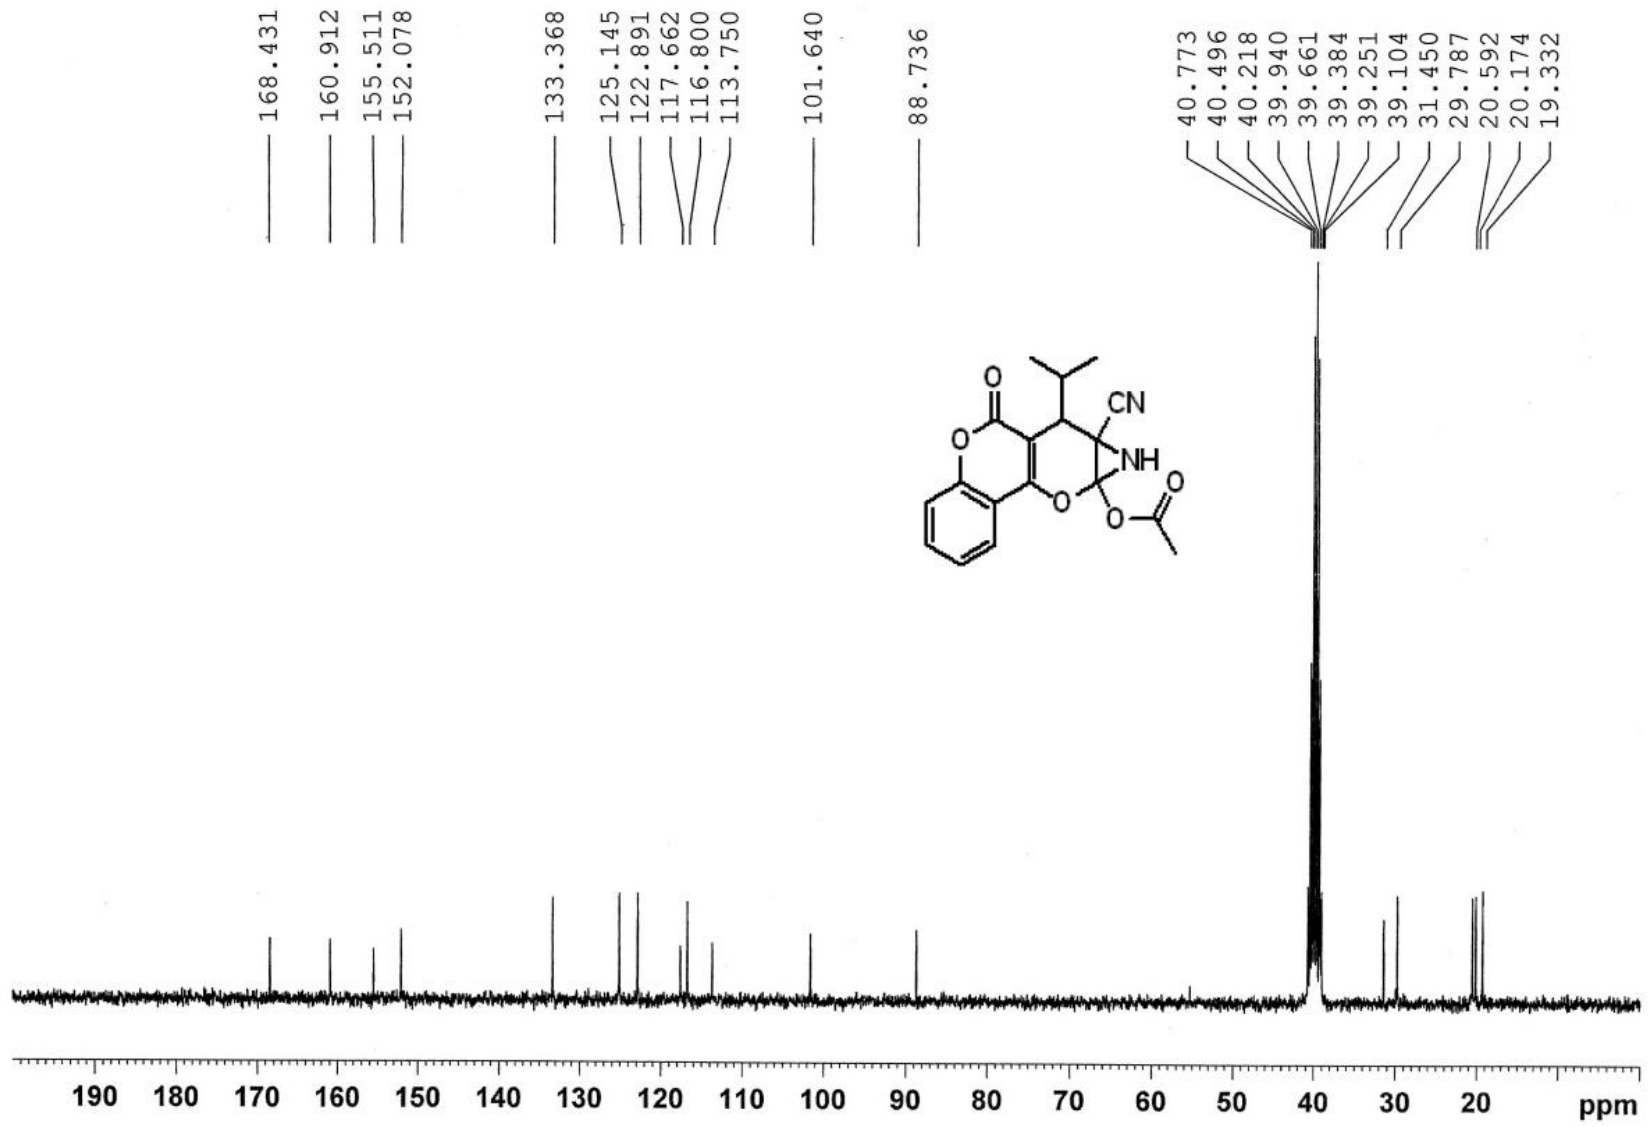

<sup>13</sup>C NMR of 2j



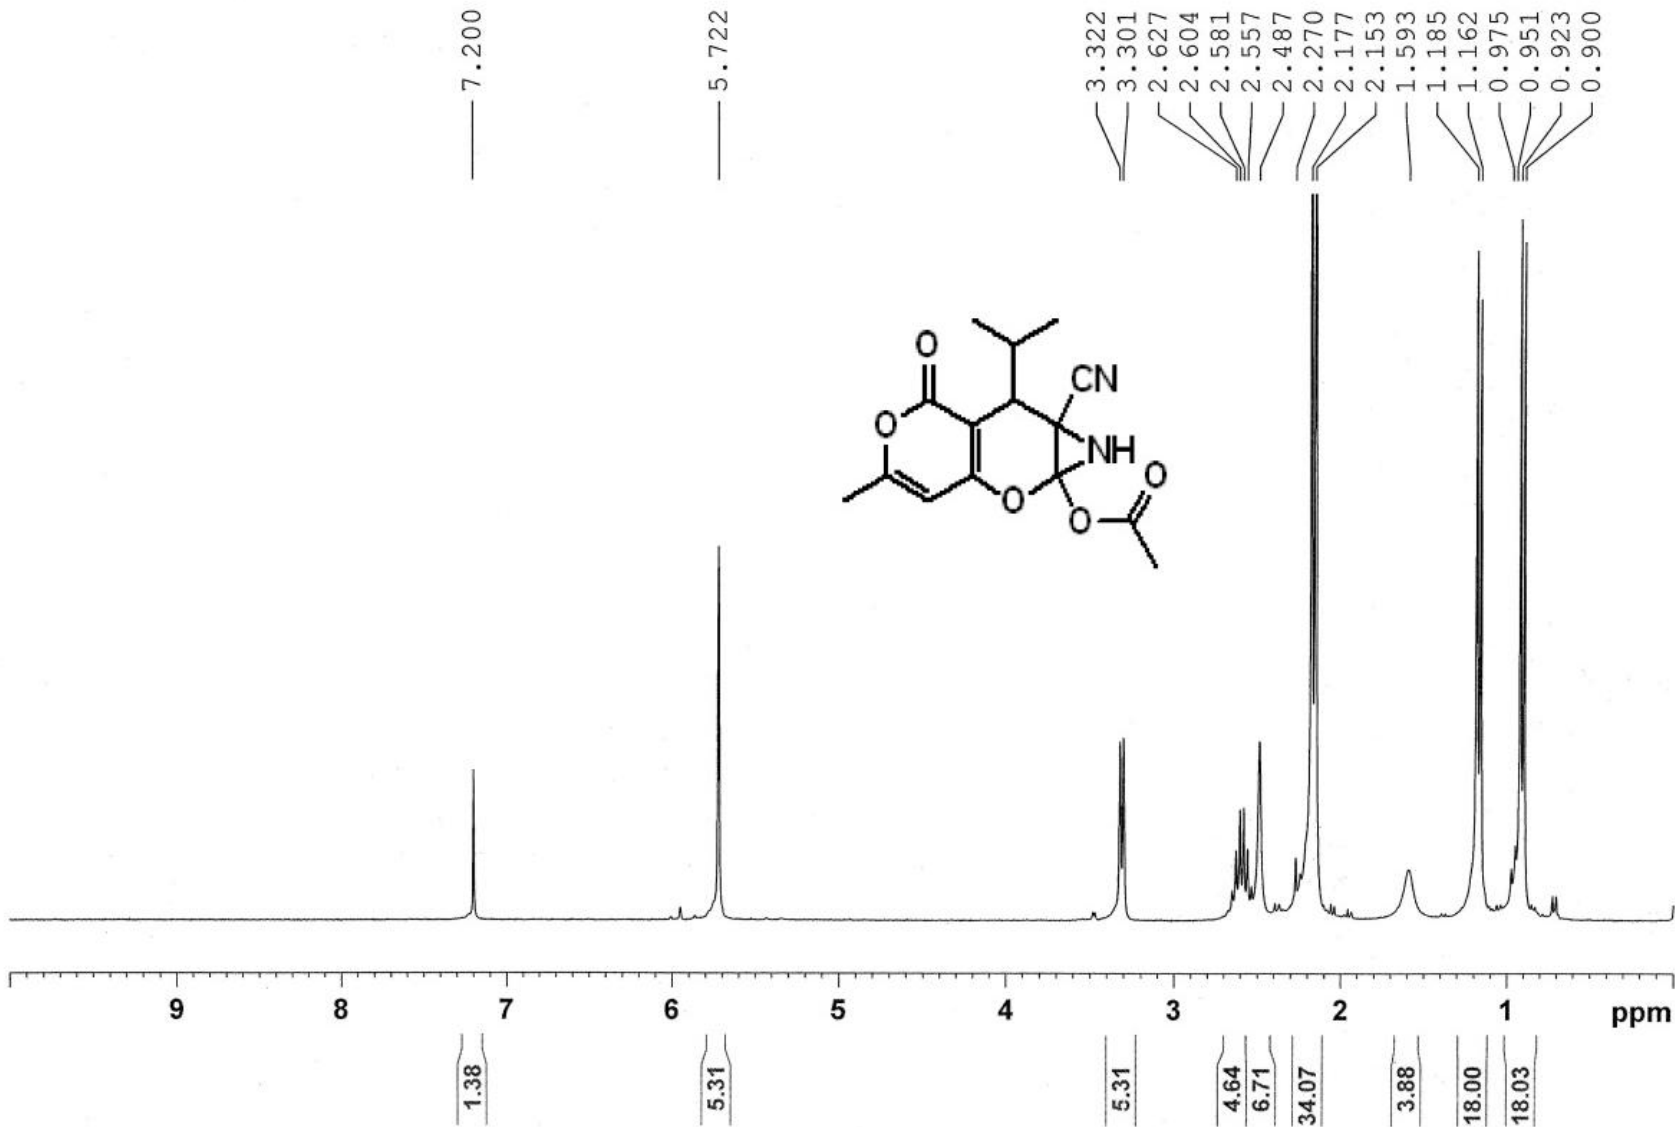

<sup>1</sup>H NMR of 2k

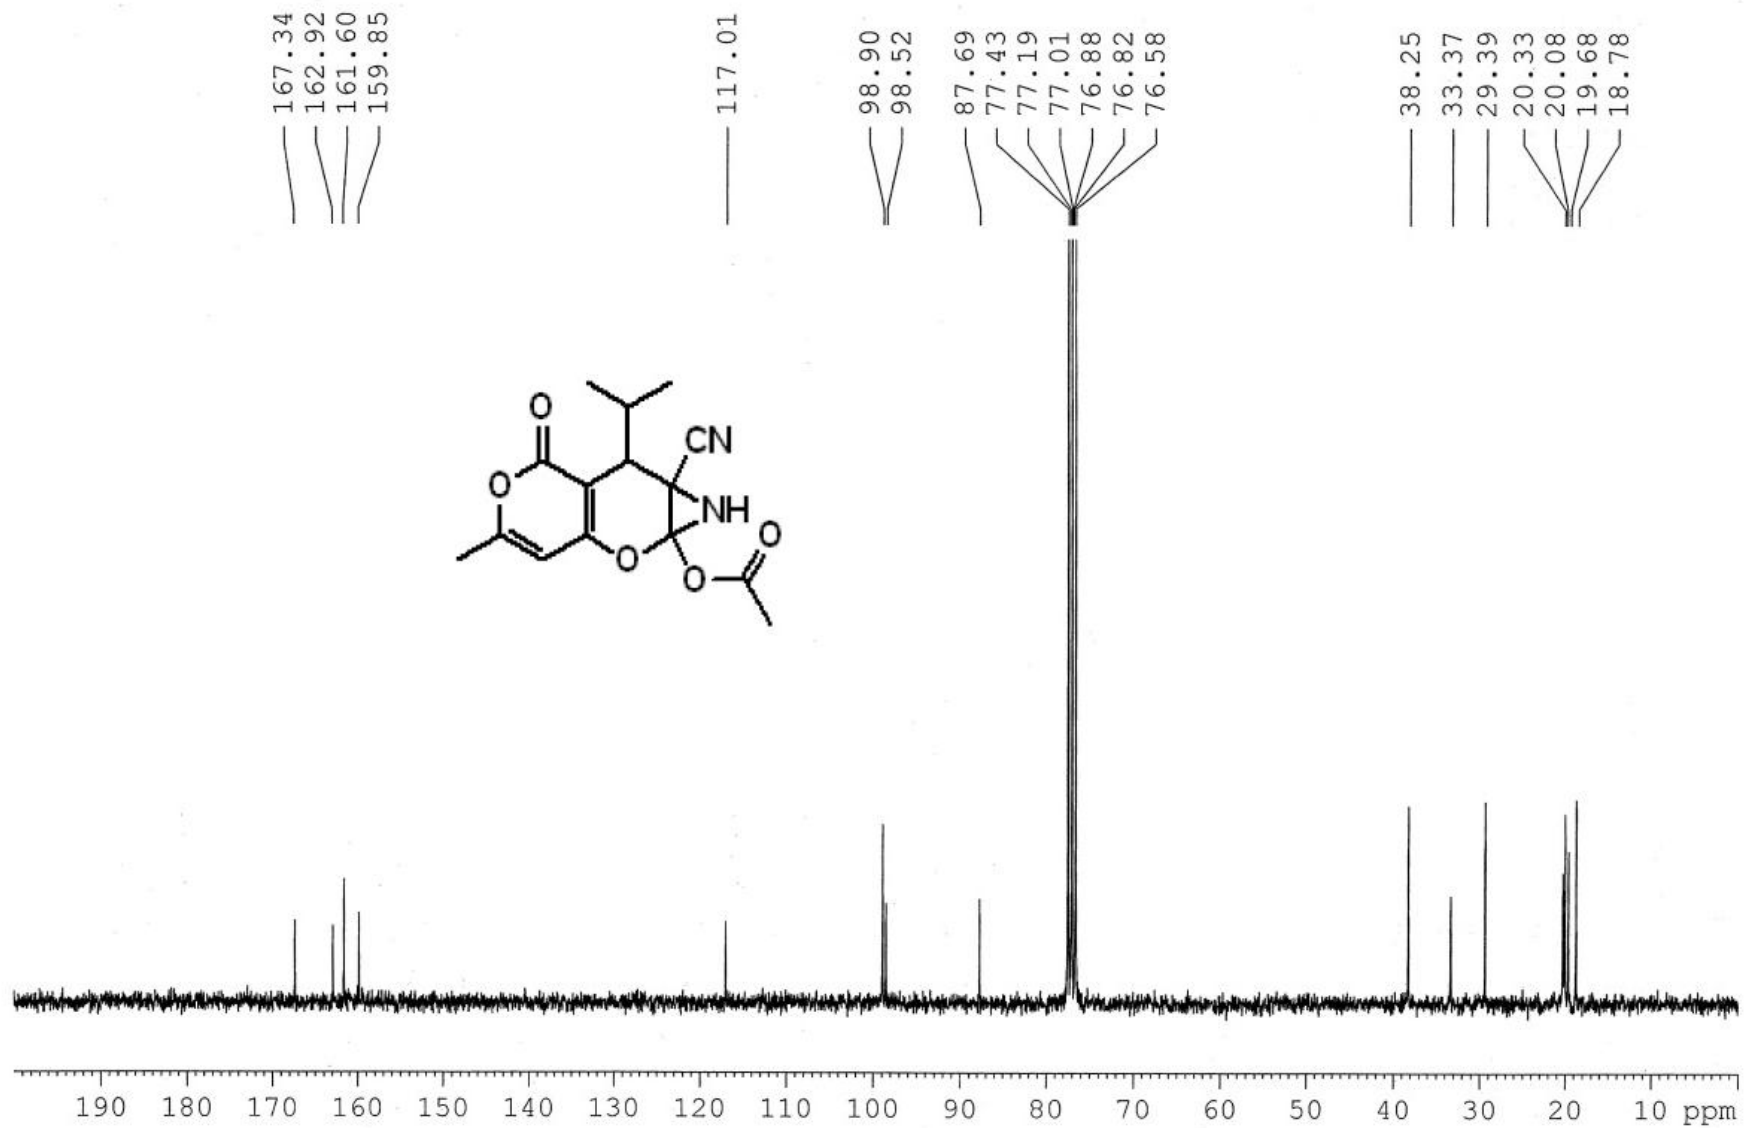

<sup>13</sup>C NMR of 2k

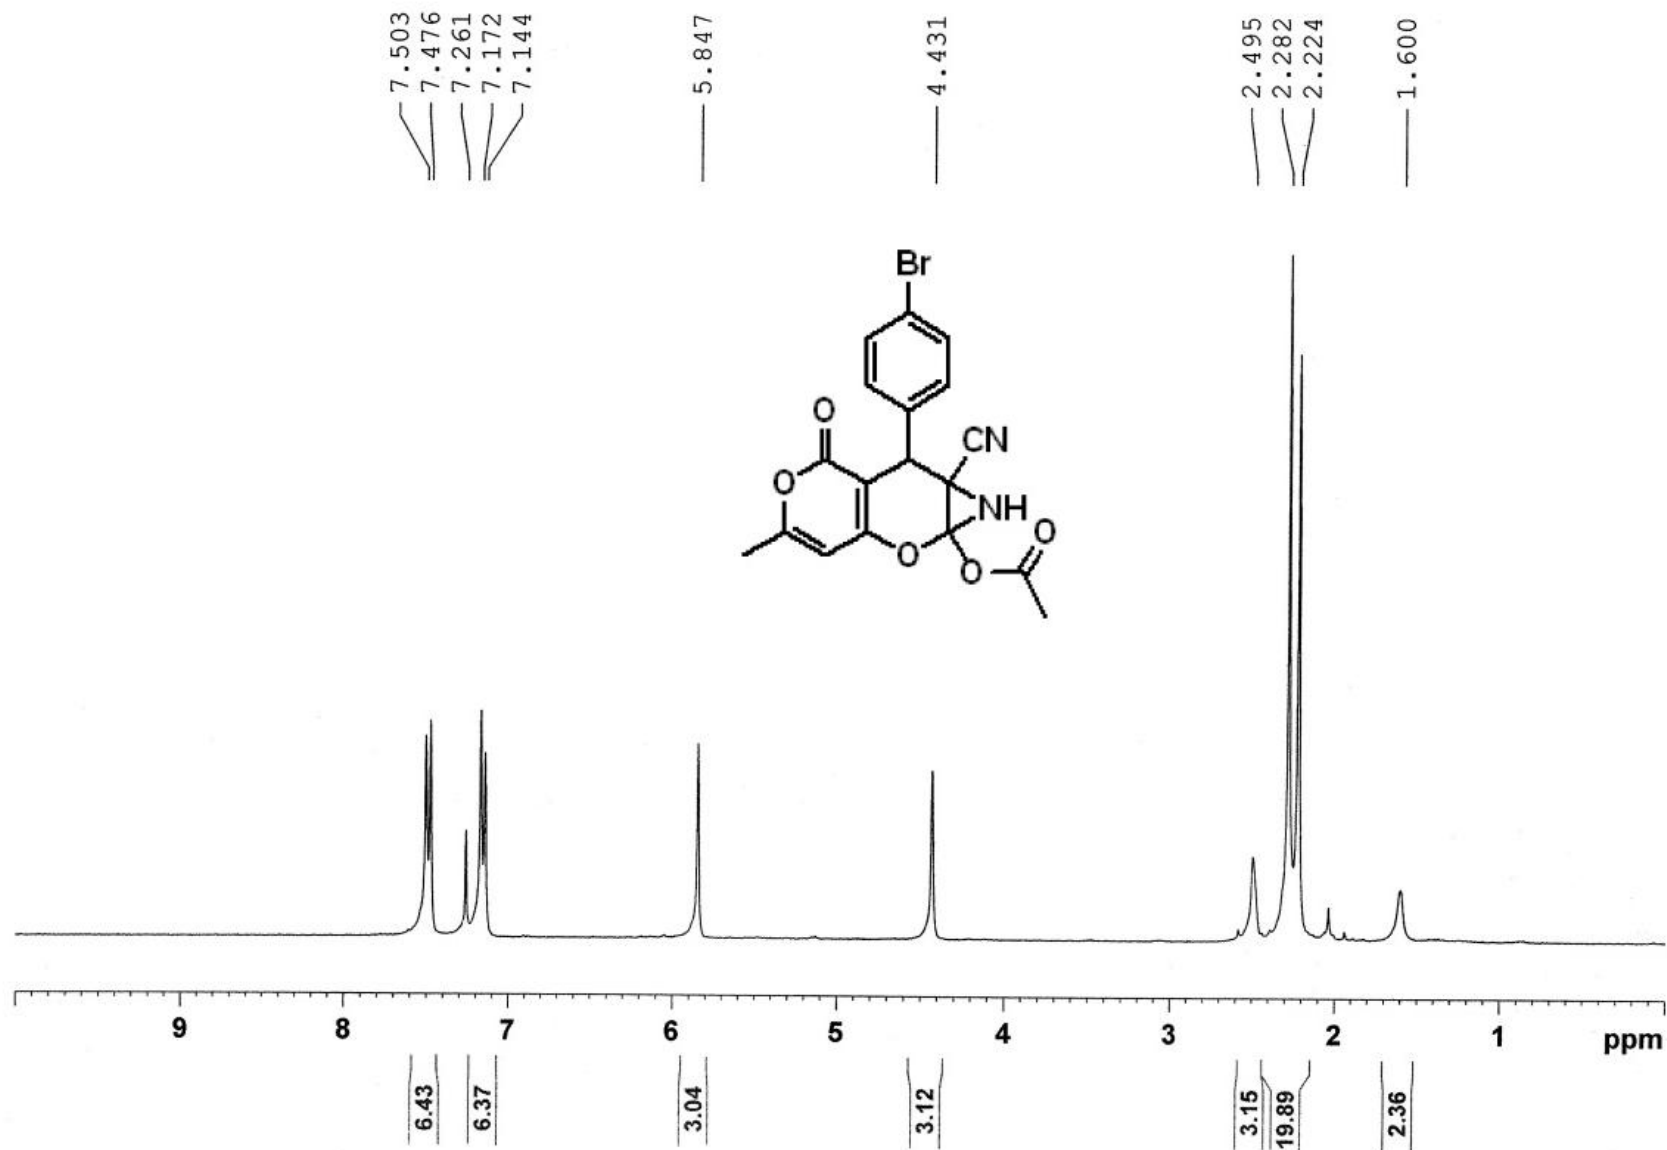

<sup>1</sup>H NMR of 2l

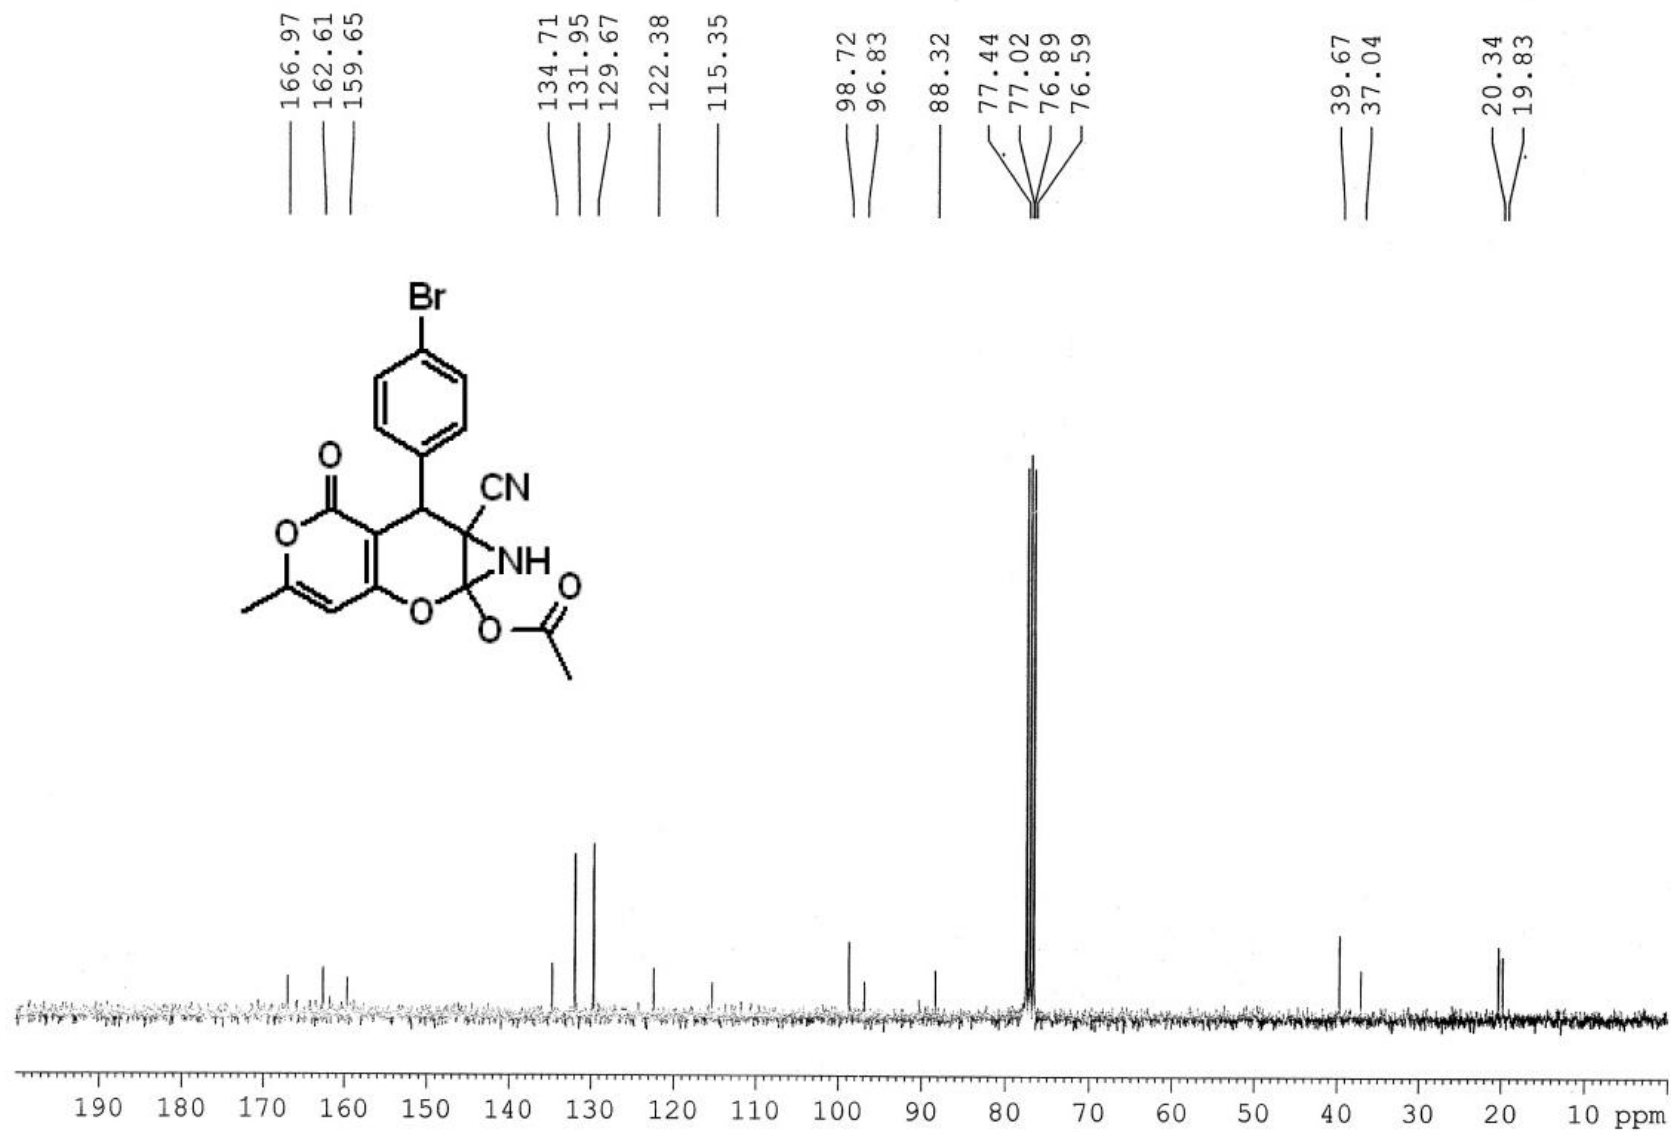

$^{13}\text{C}$  NMR of 21

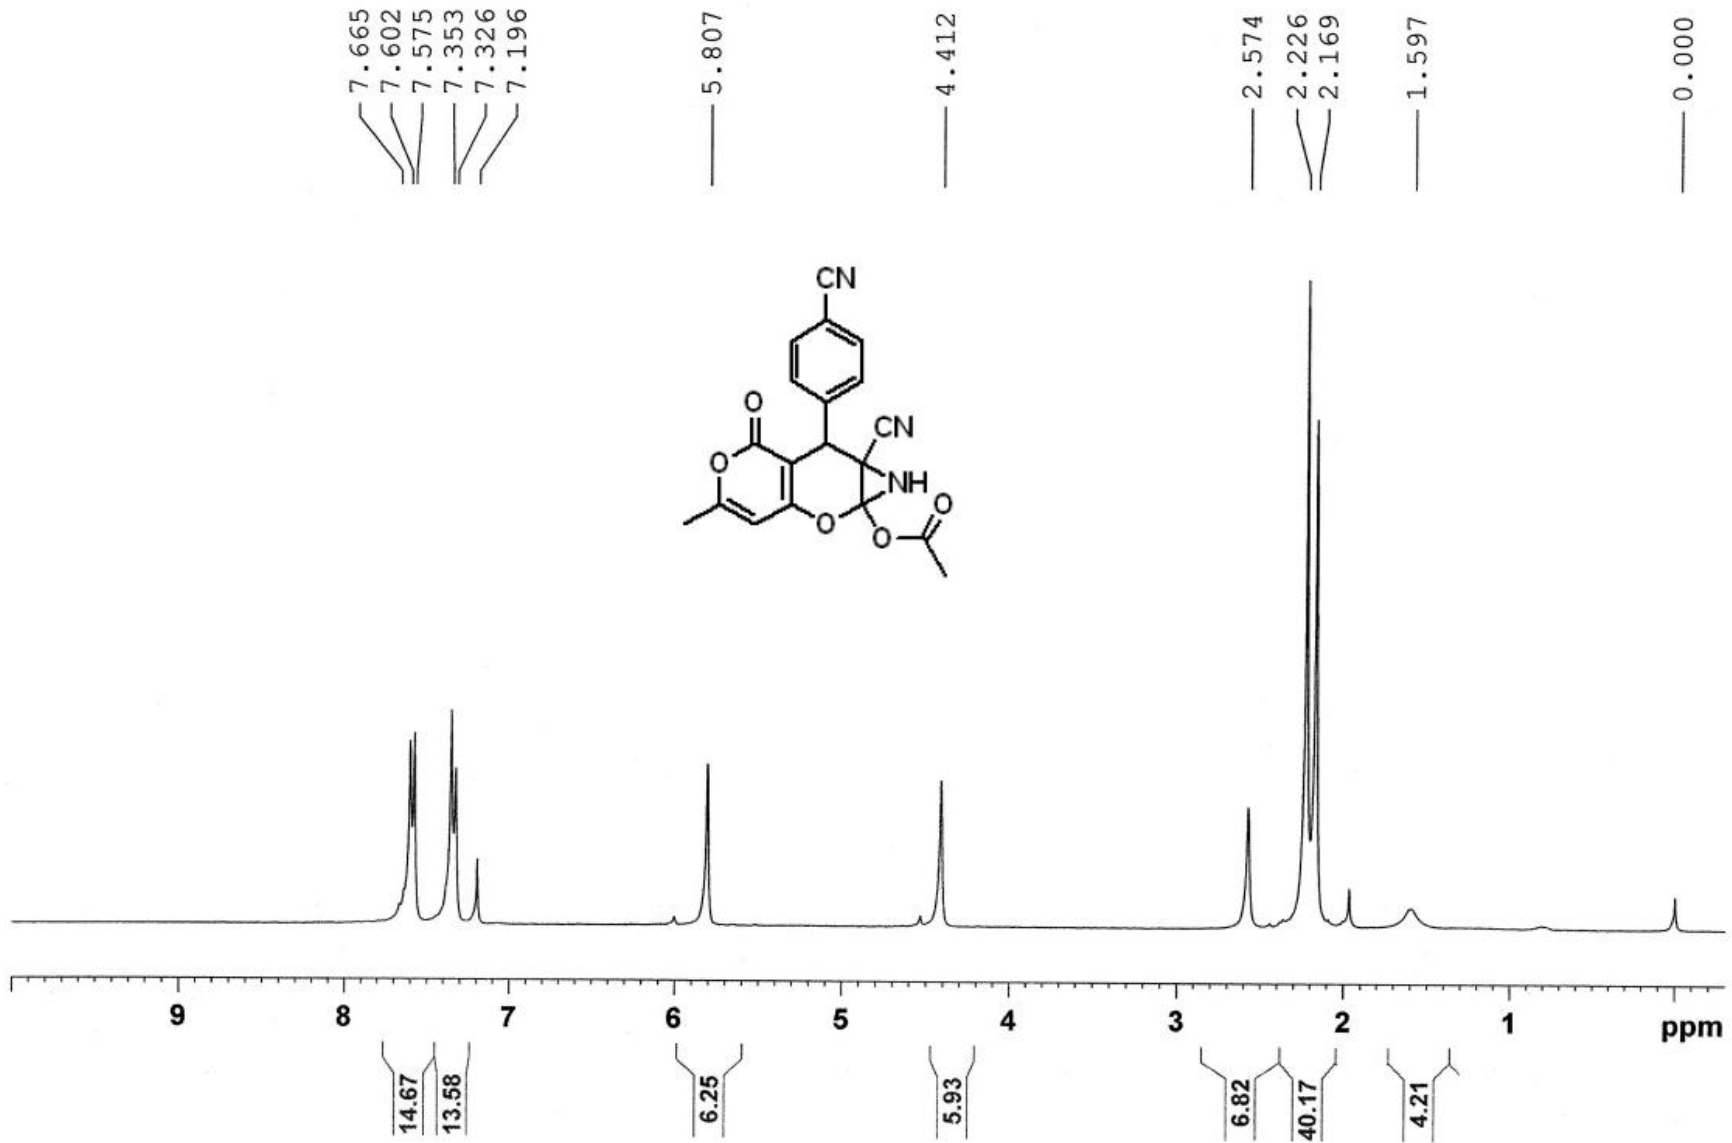

<sup>1</sup>H NMR of 2m

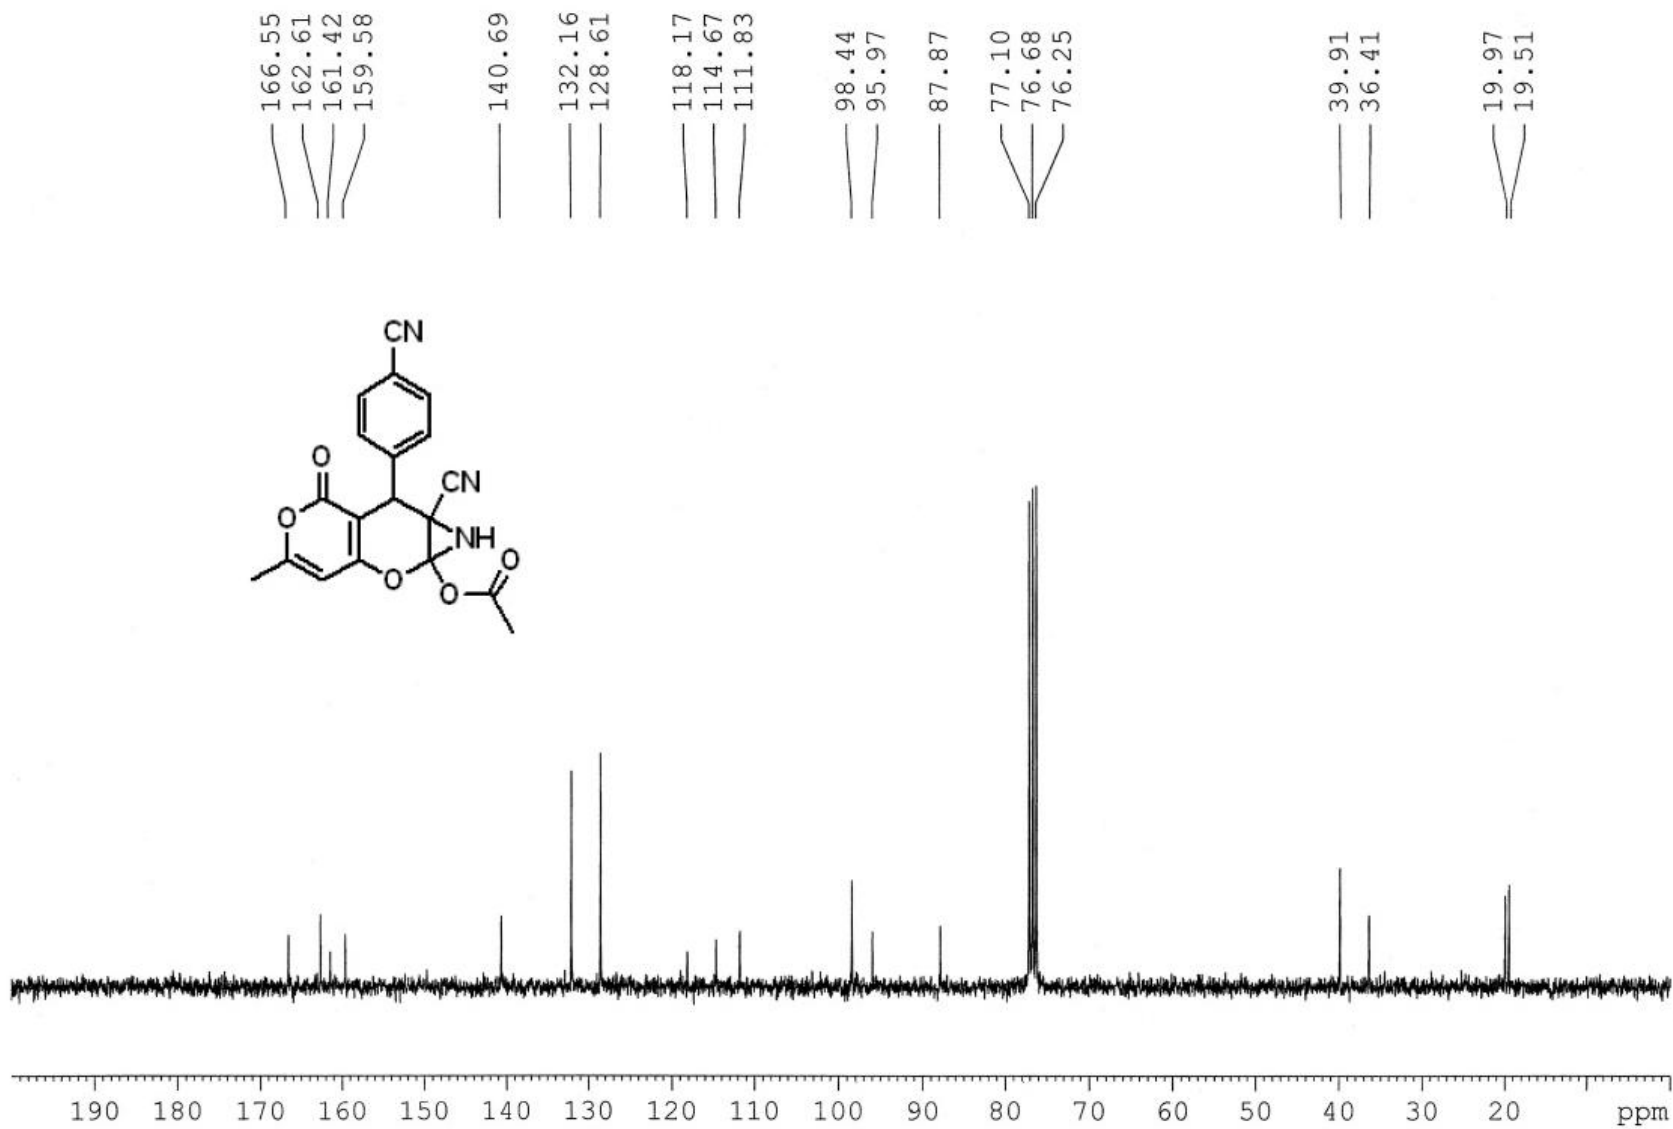

$^{13}\text{C}$  NMR of 2m

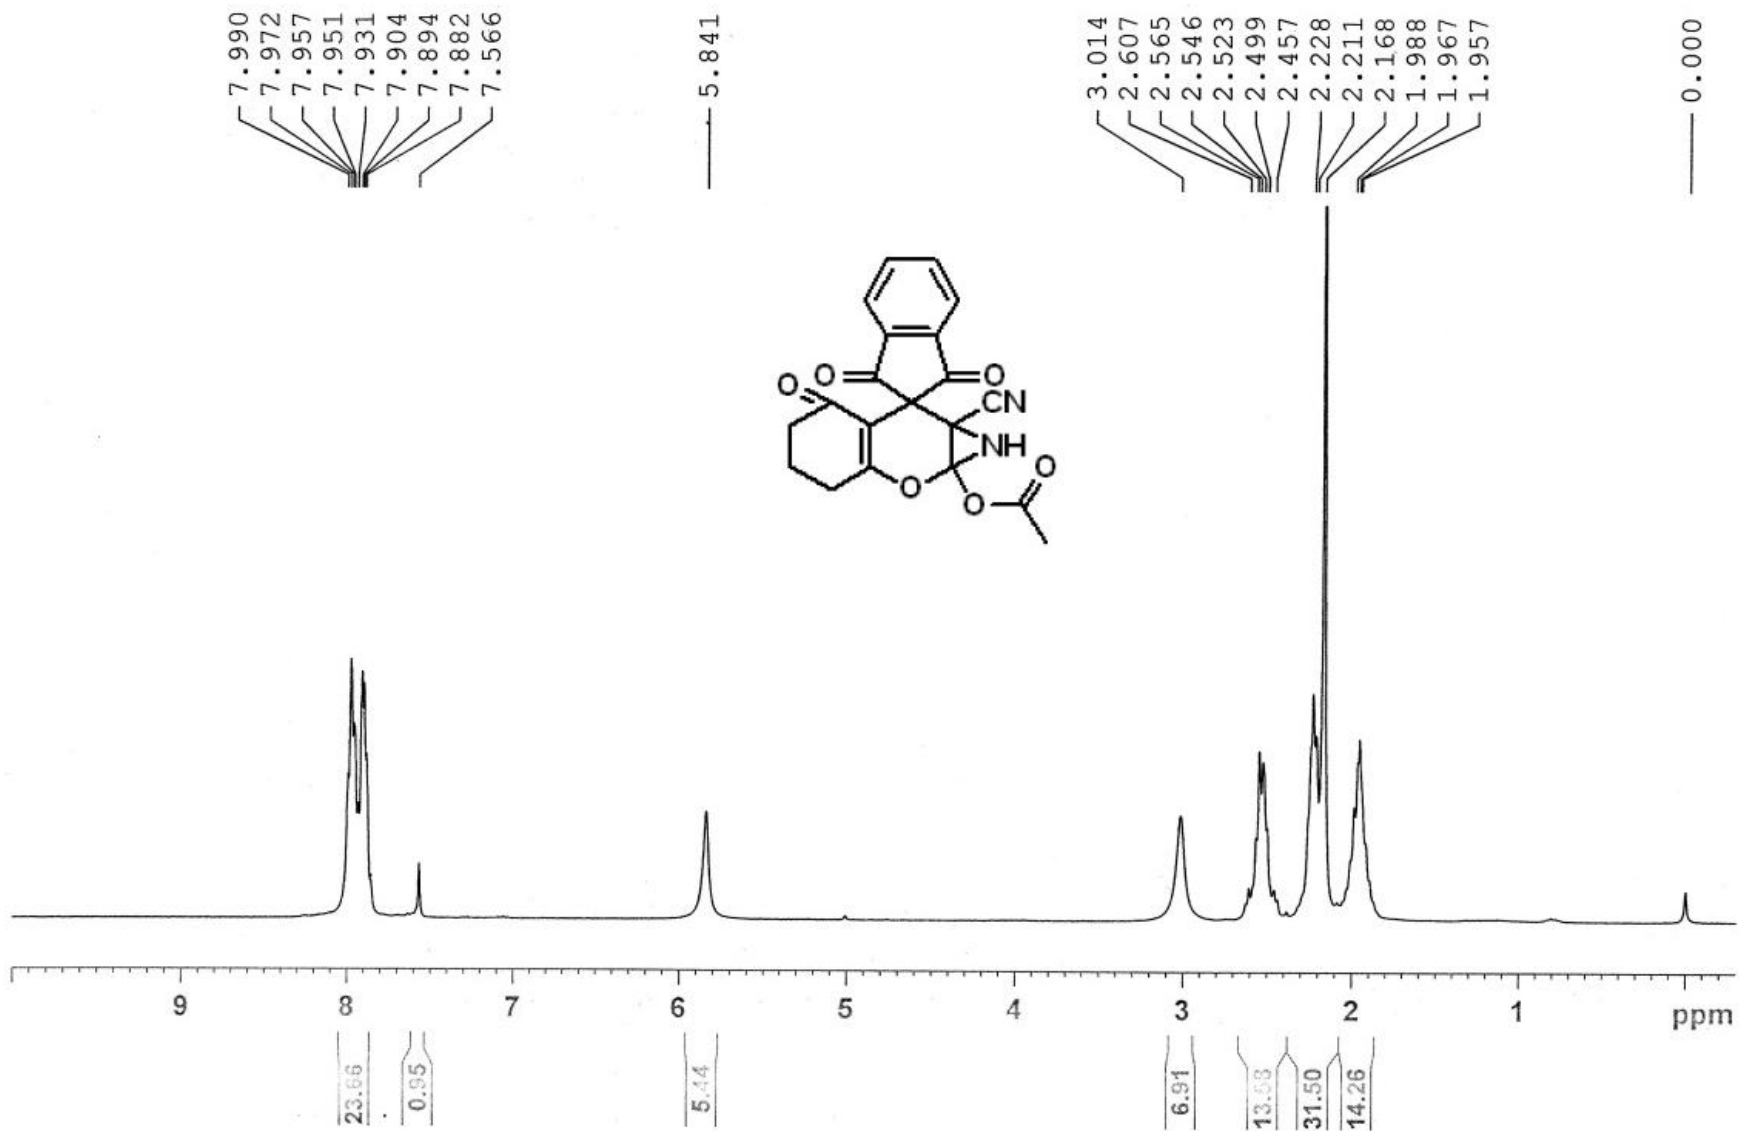

<sup>1</sup>H NMR of 2n

195.80  
195.60  
193.89

169.83  
166.33

140.70  
140.59  
136.24  
135.87

123.45  
123.33

113.10  
109.75

86.70  
78.26  
78.02  
77.83  
77.40

54.04  
40.48  
40.21  
39.94  
39.66  
39.38  
39.10  
38.82  
35.51  
35.34  
27.65  
20.10  
19.61

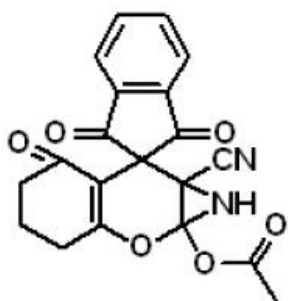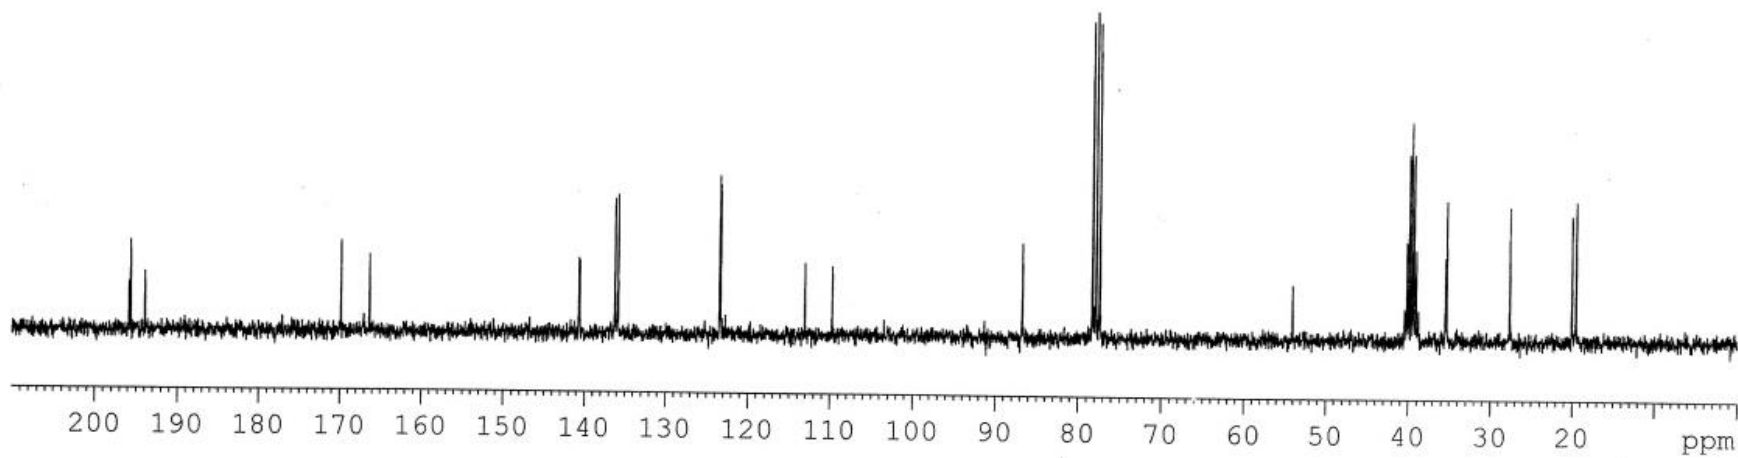

<sup>13</sup>C NMR of 2n



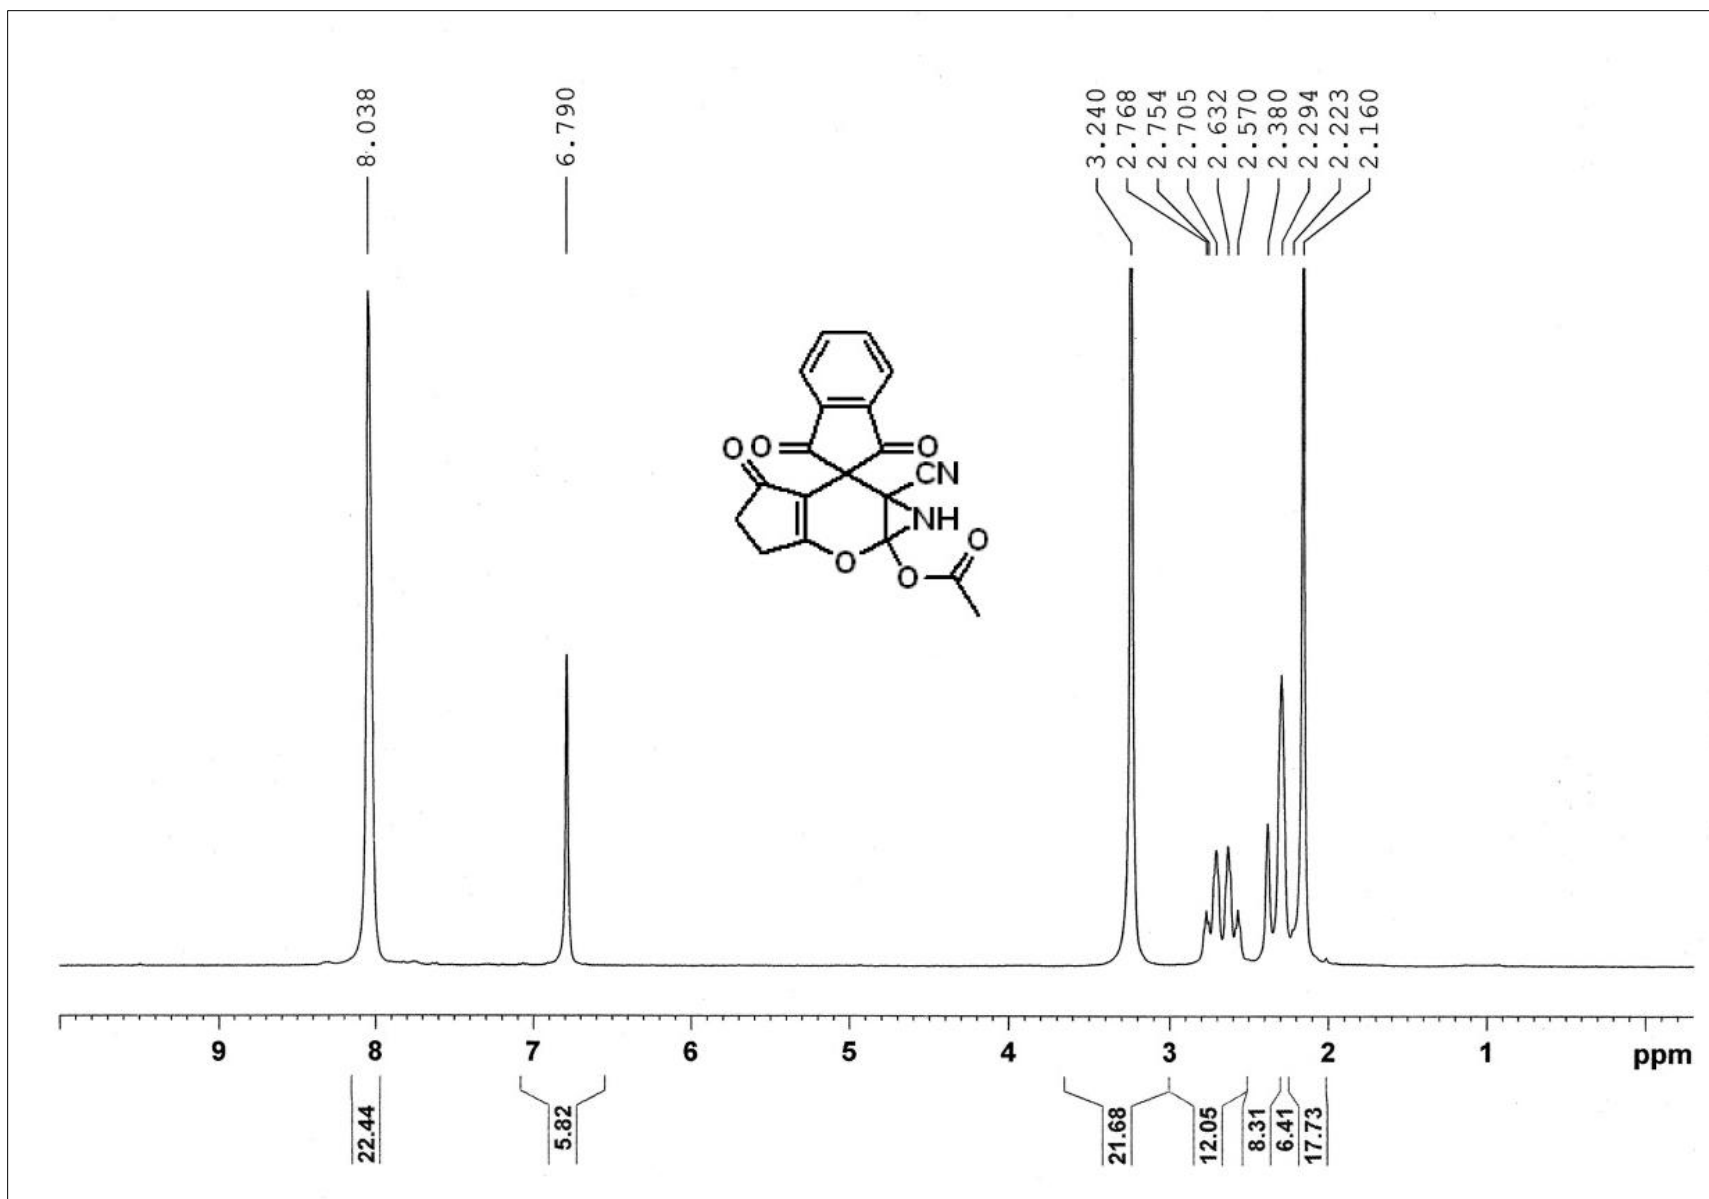

**<sup>1</sup>H NMR of 2o**

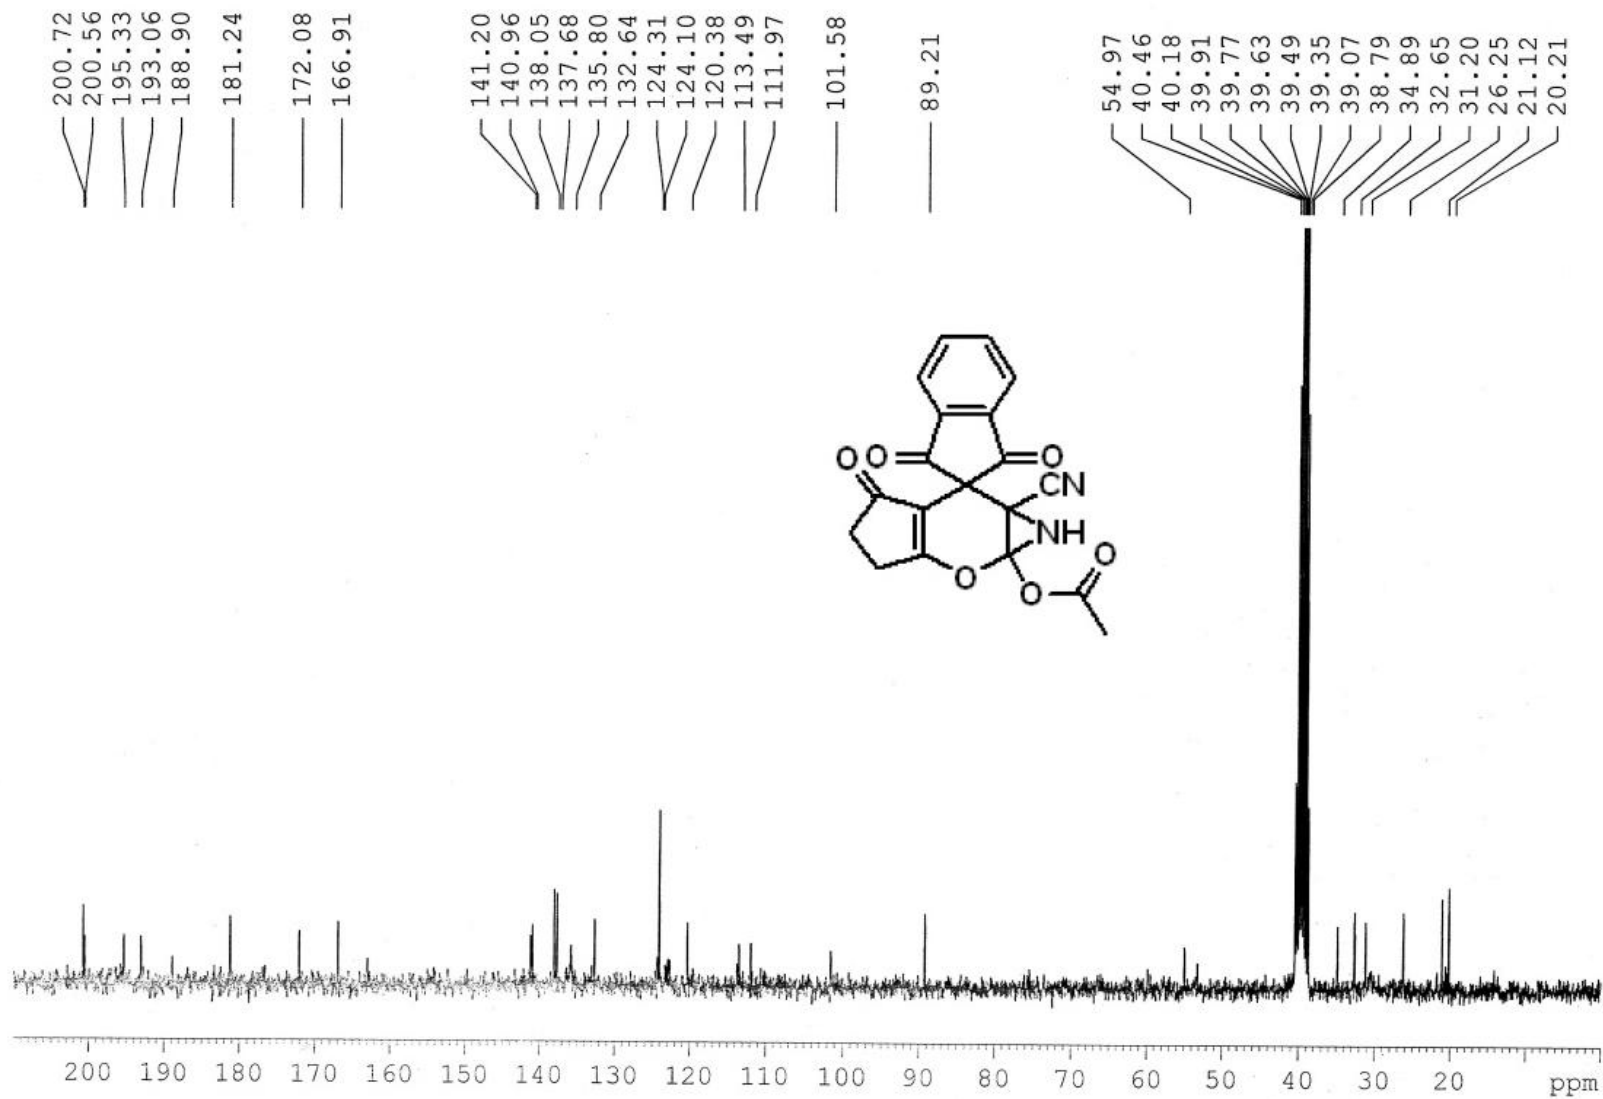

<sup>13</sup>C NMR of **2o**

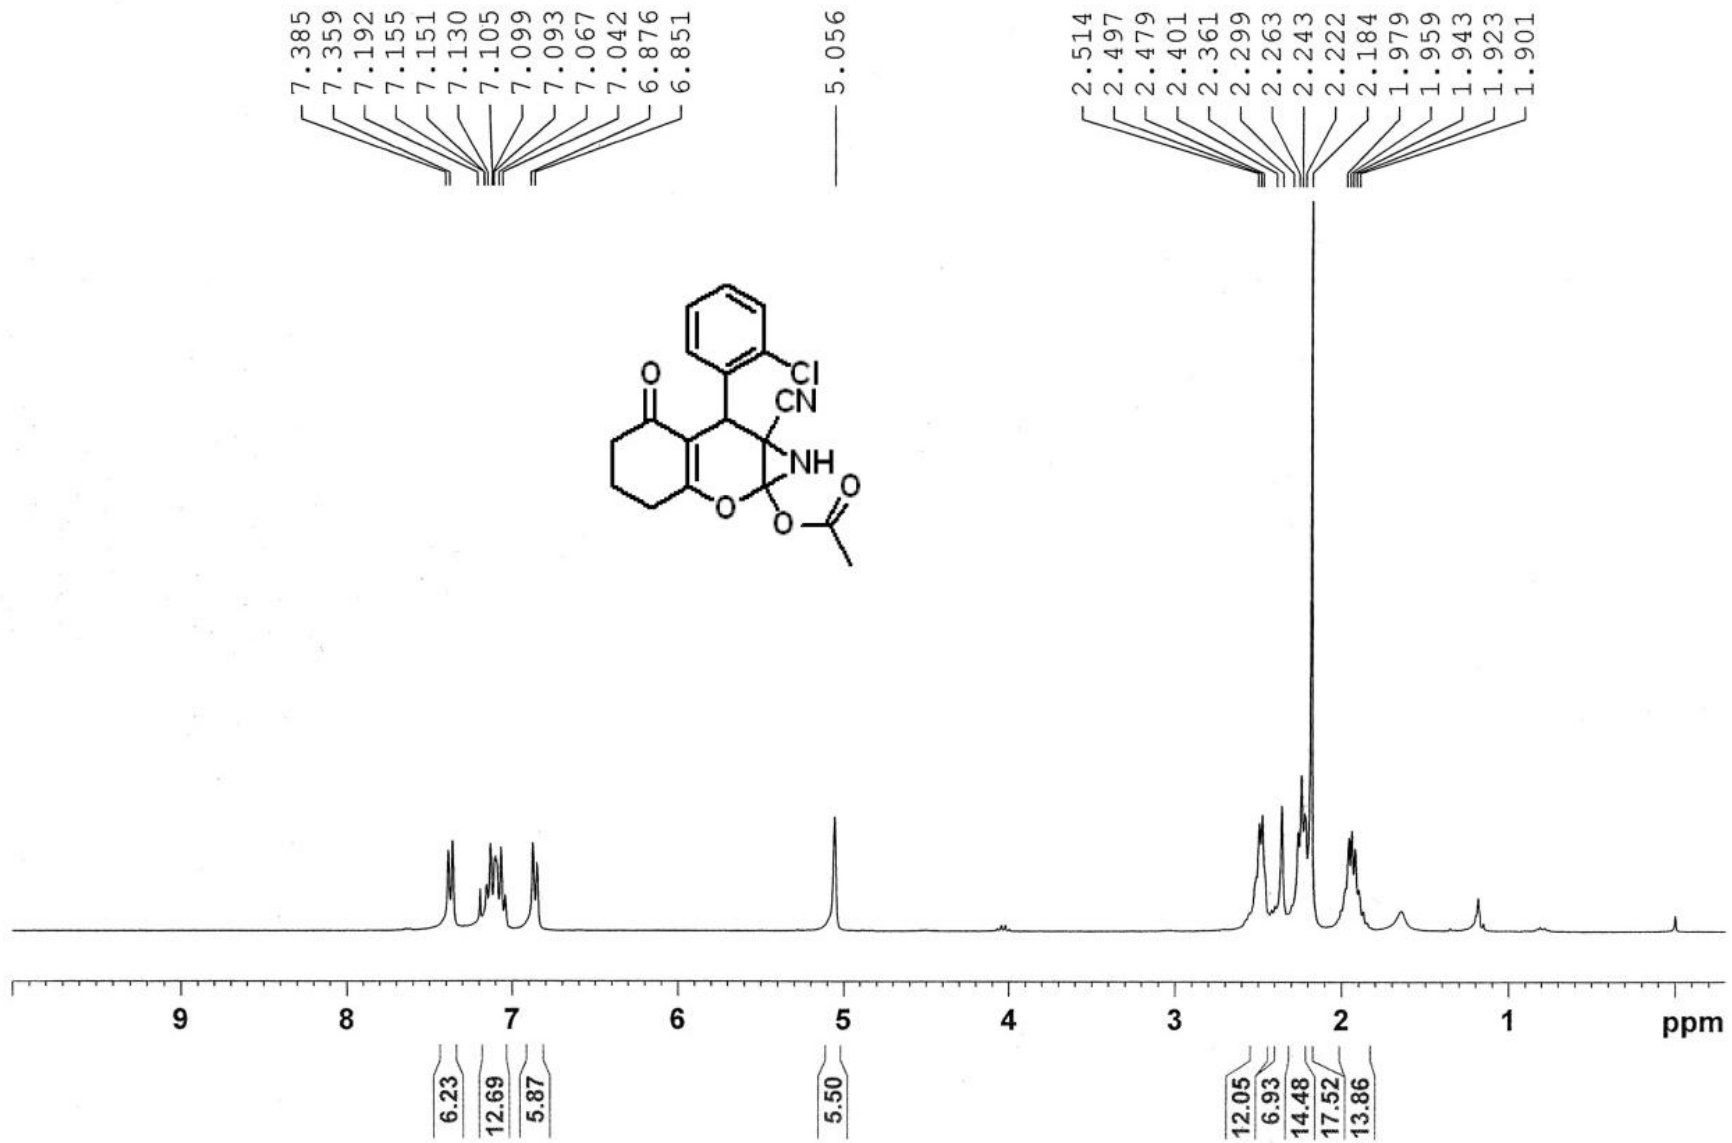

**<sup>1</sup>H NMR of 2p**

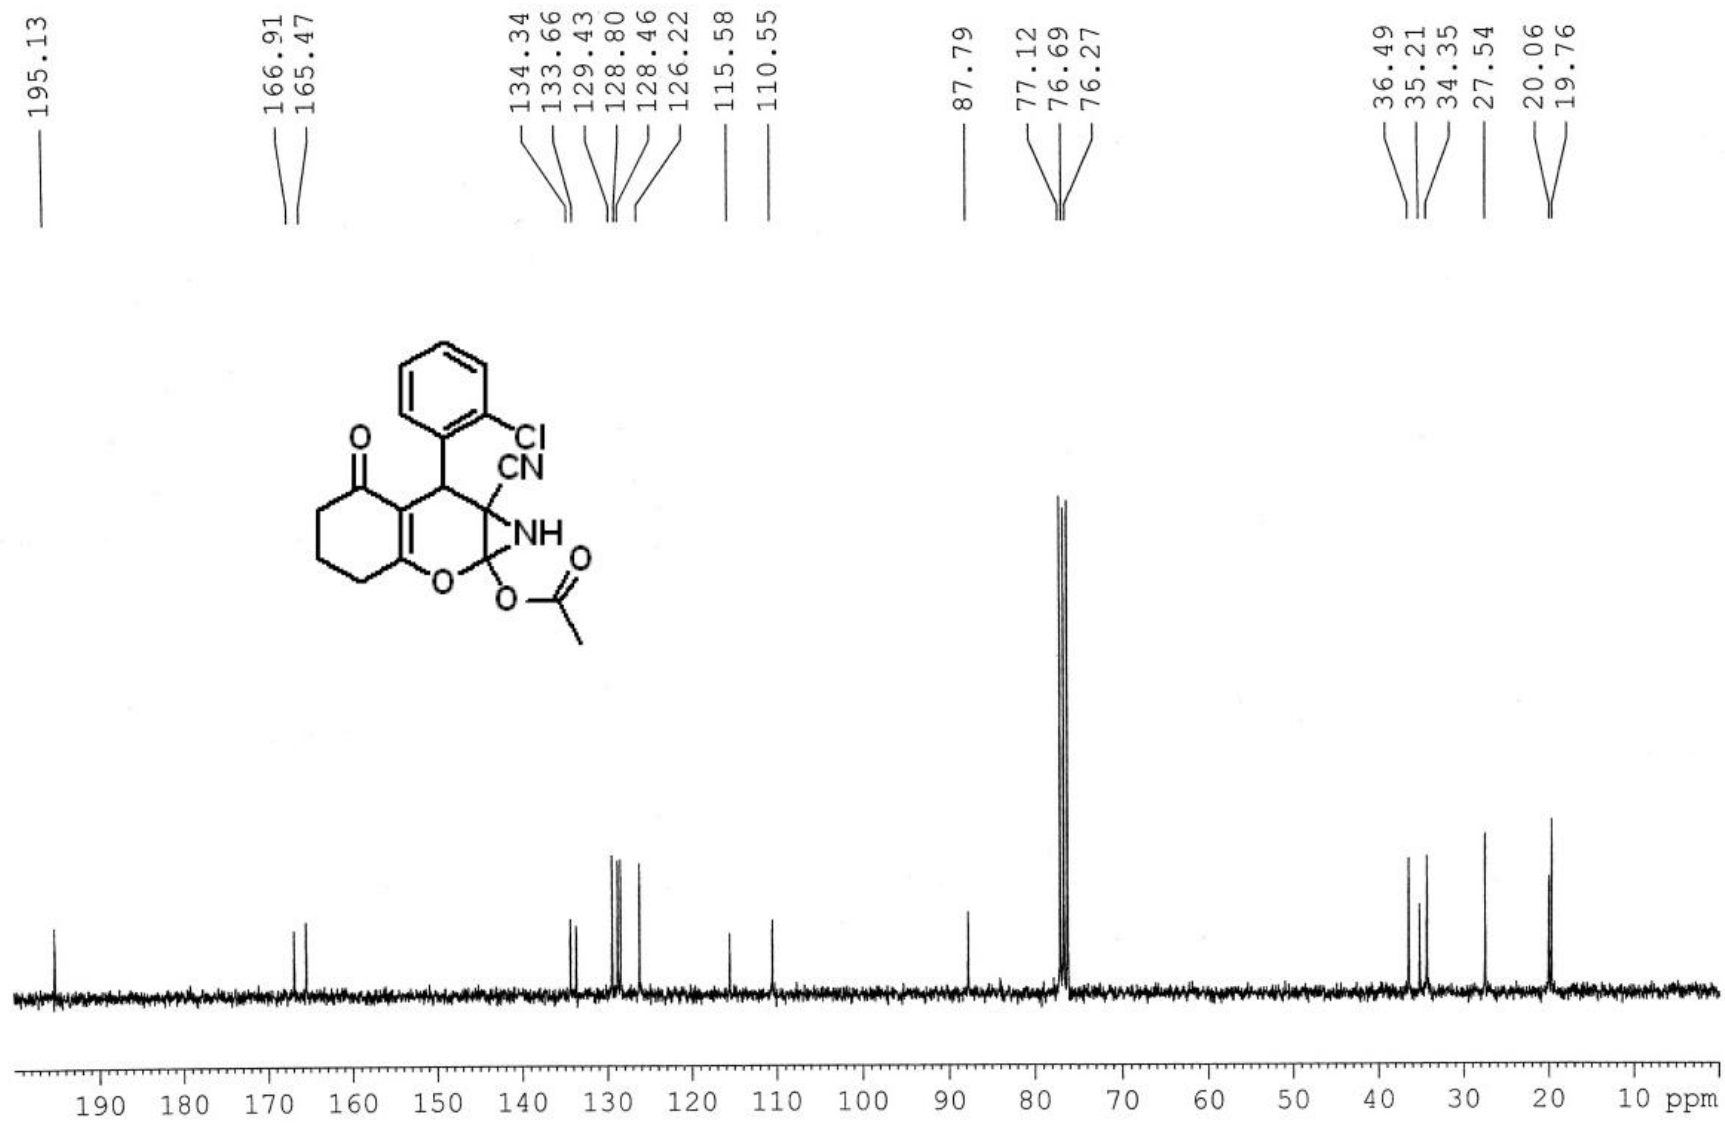

<sup>13</sup>C NMR of 2p

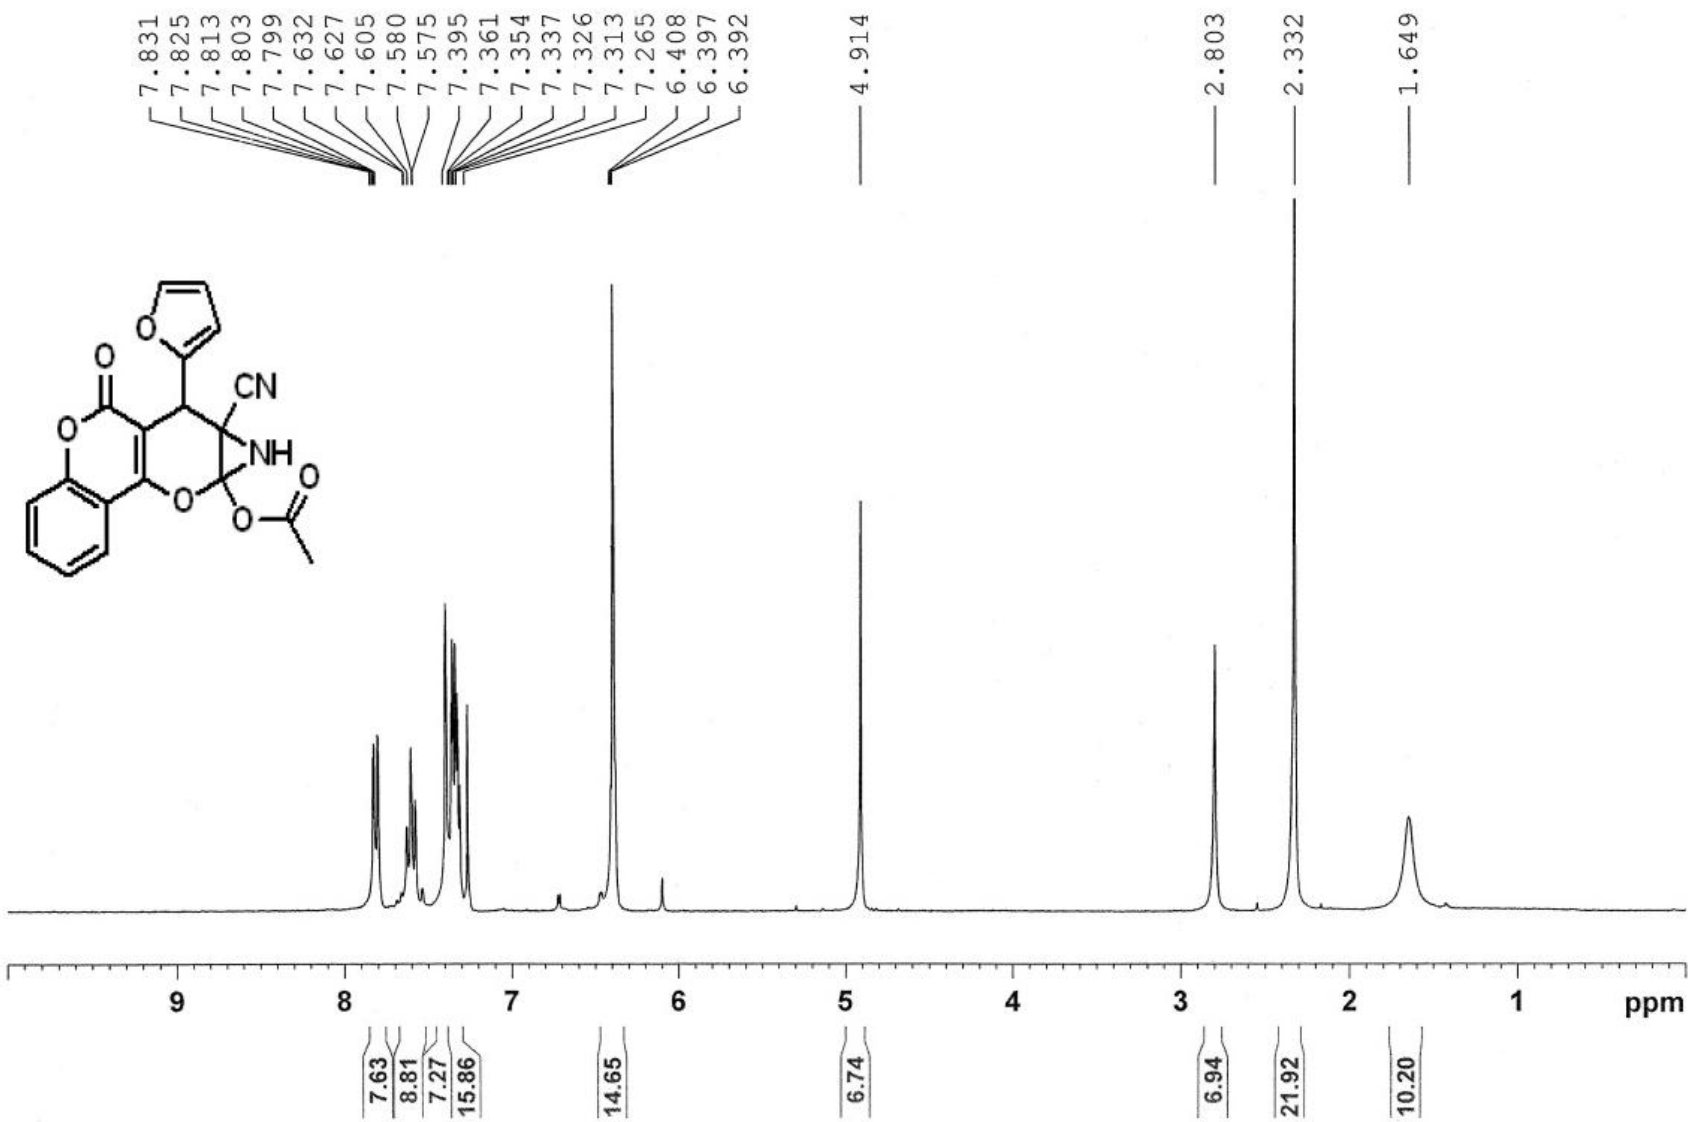

<sup>1</sup>H NMR of 2q

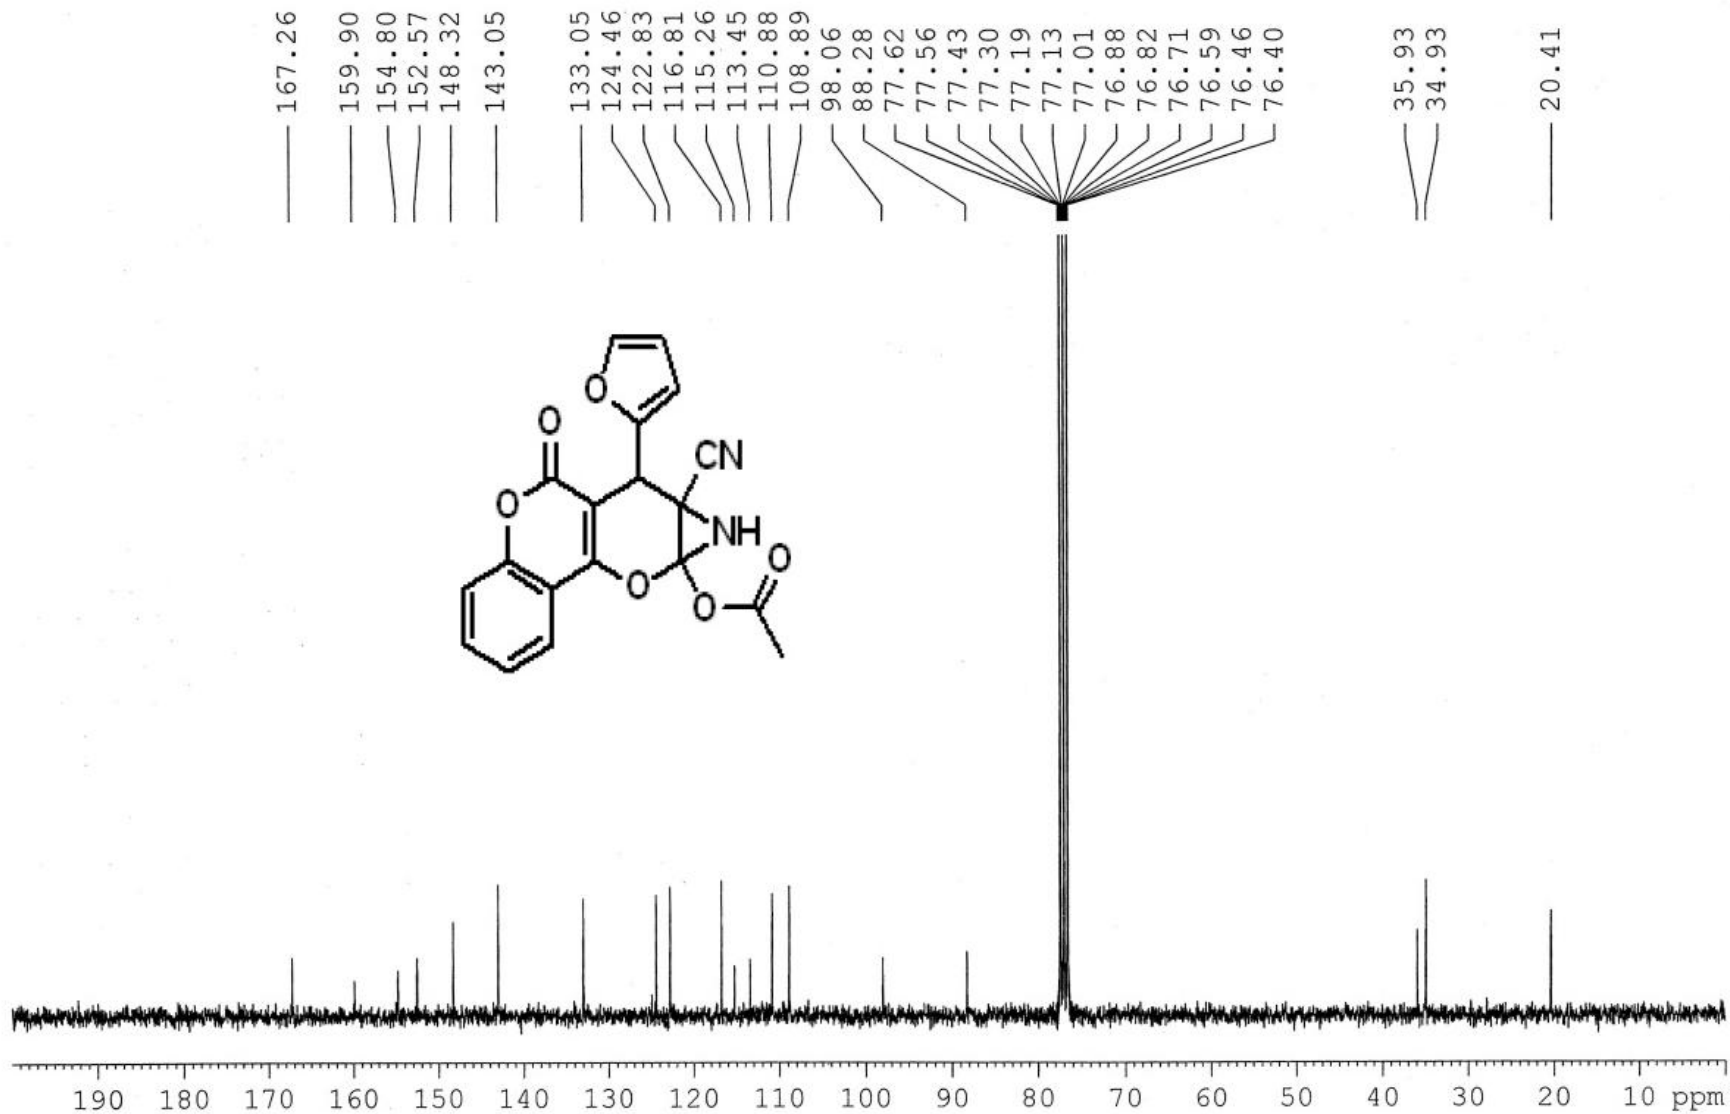

<sup>13</sup>C NMR of 2q

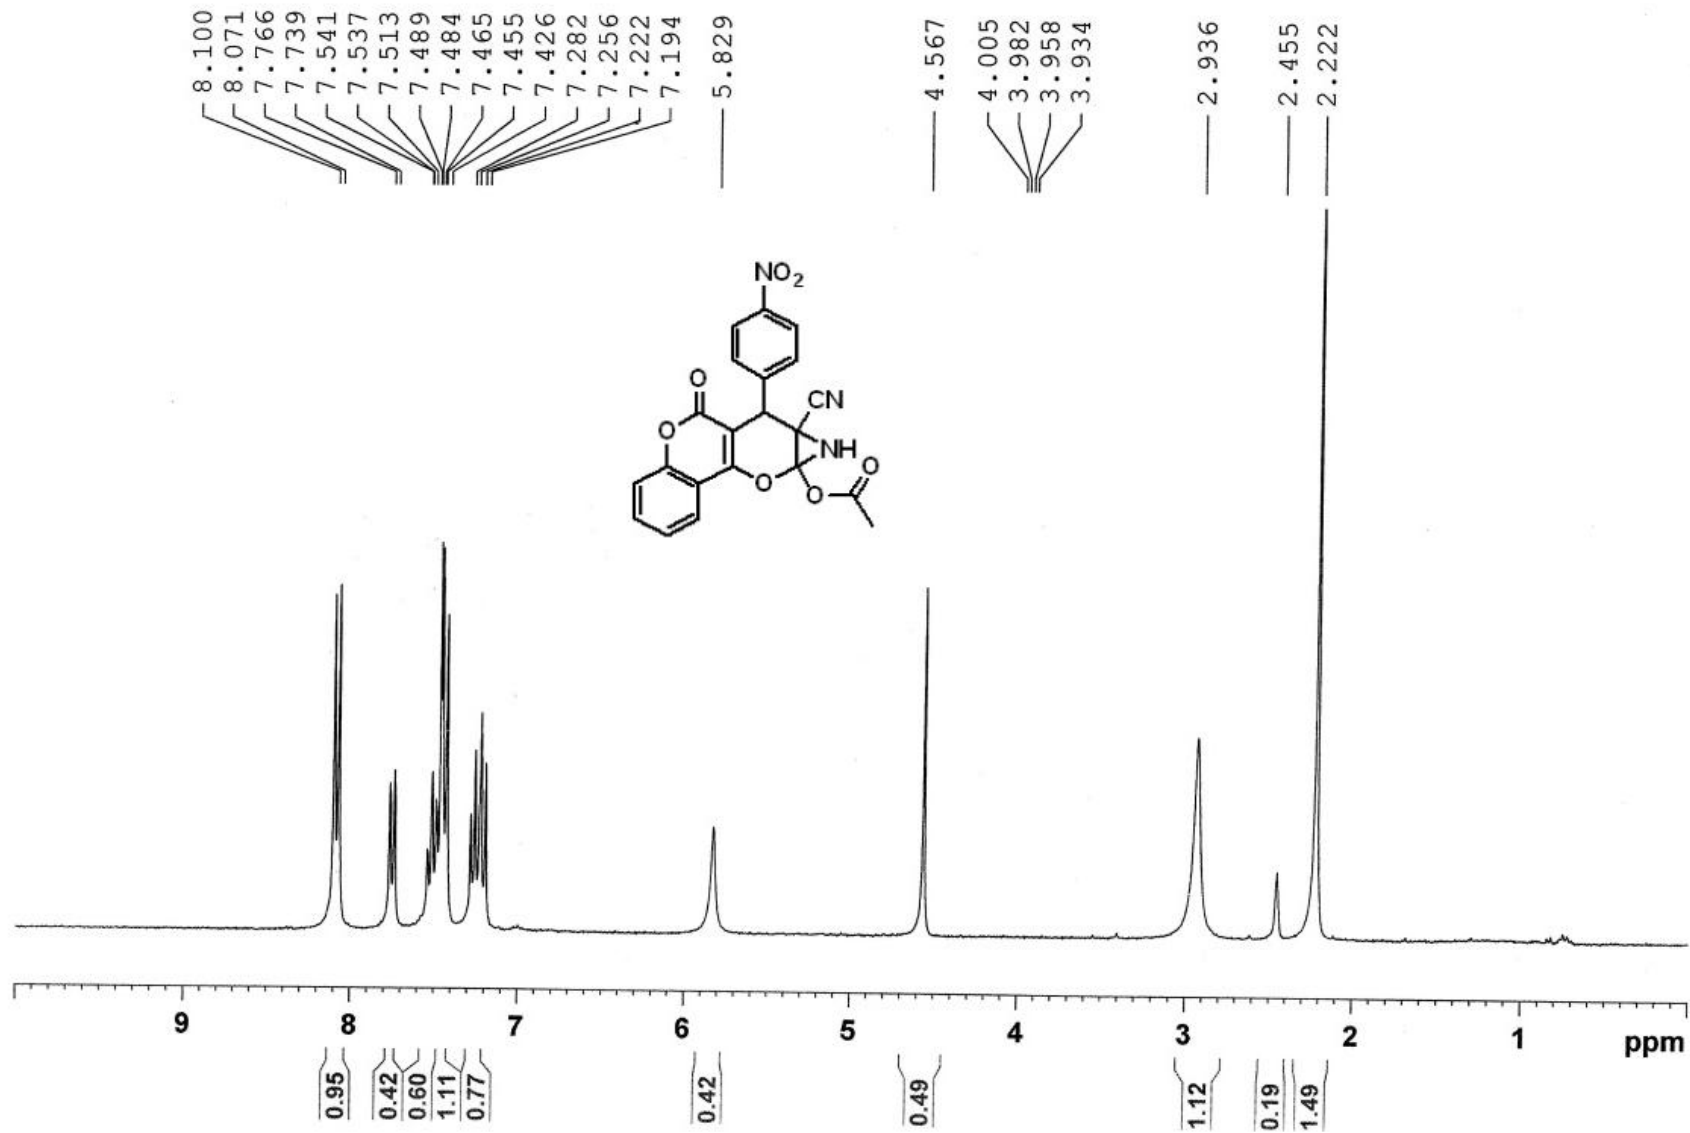

<sup>1</sup>H NMR of 2r

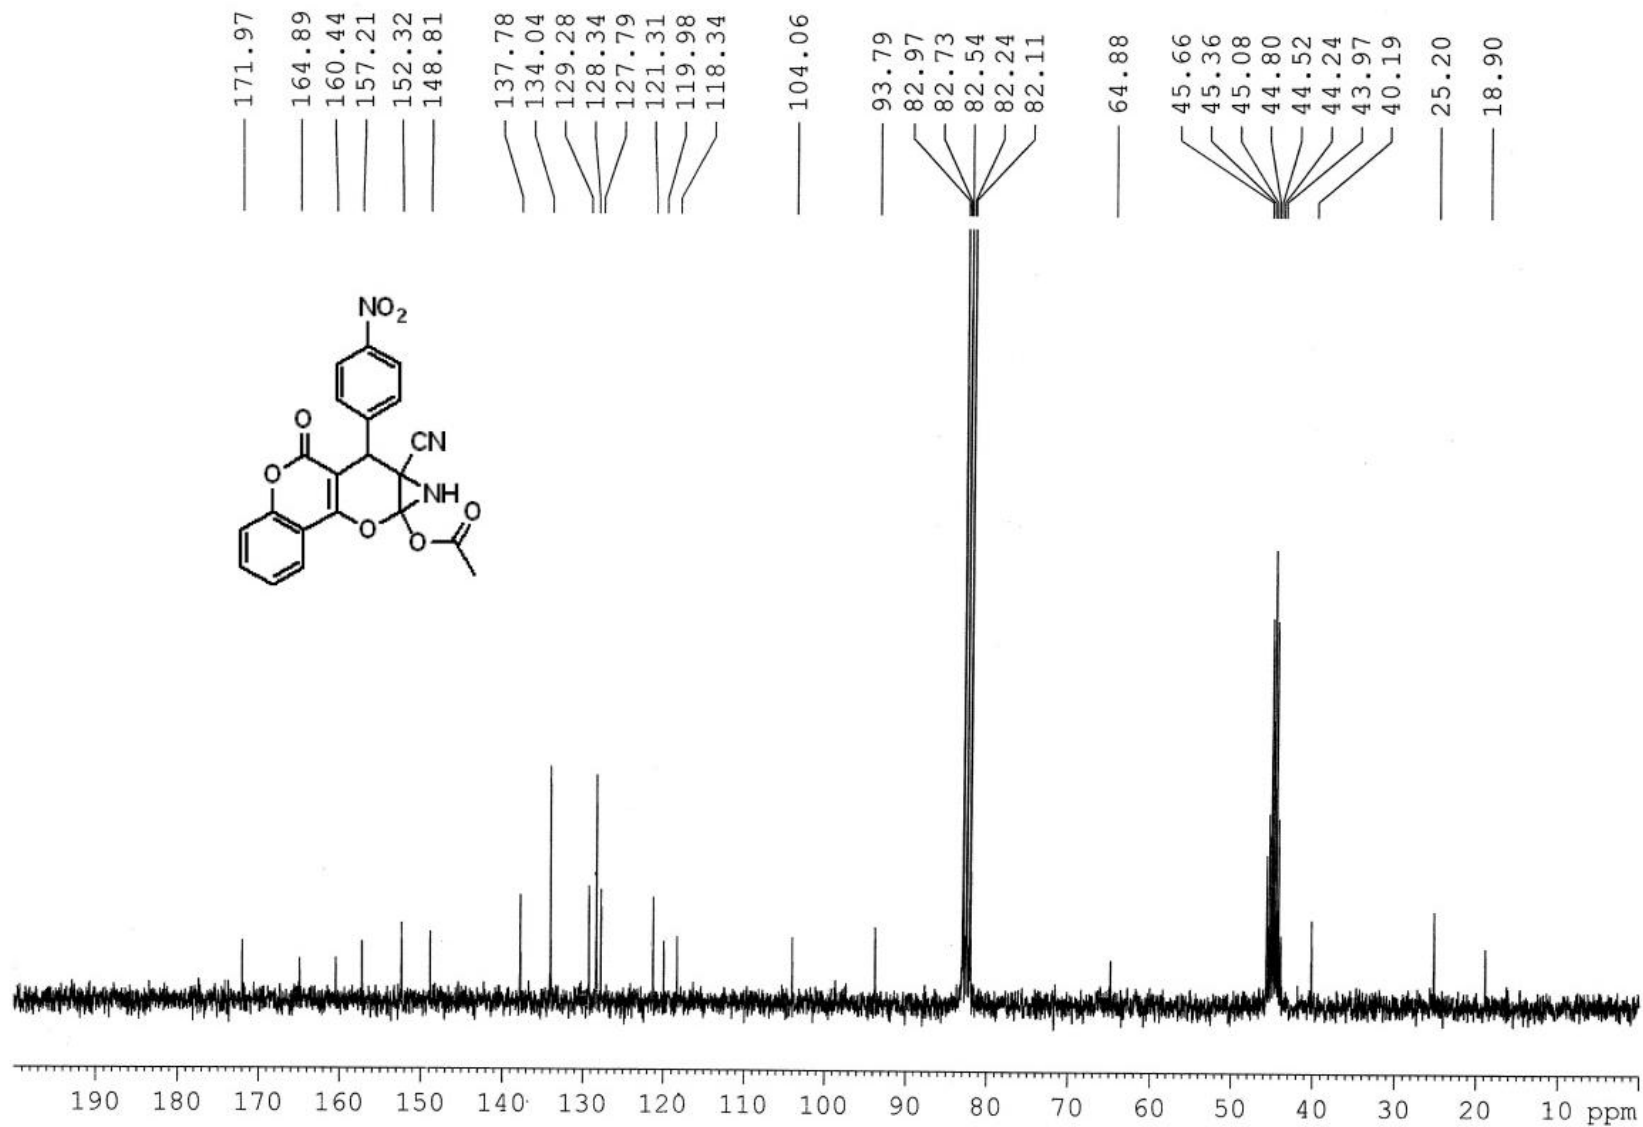

<sup>13</sup>C NMR of 2r



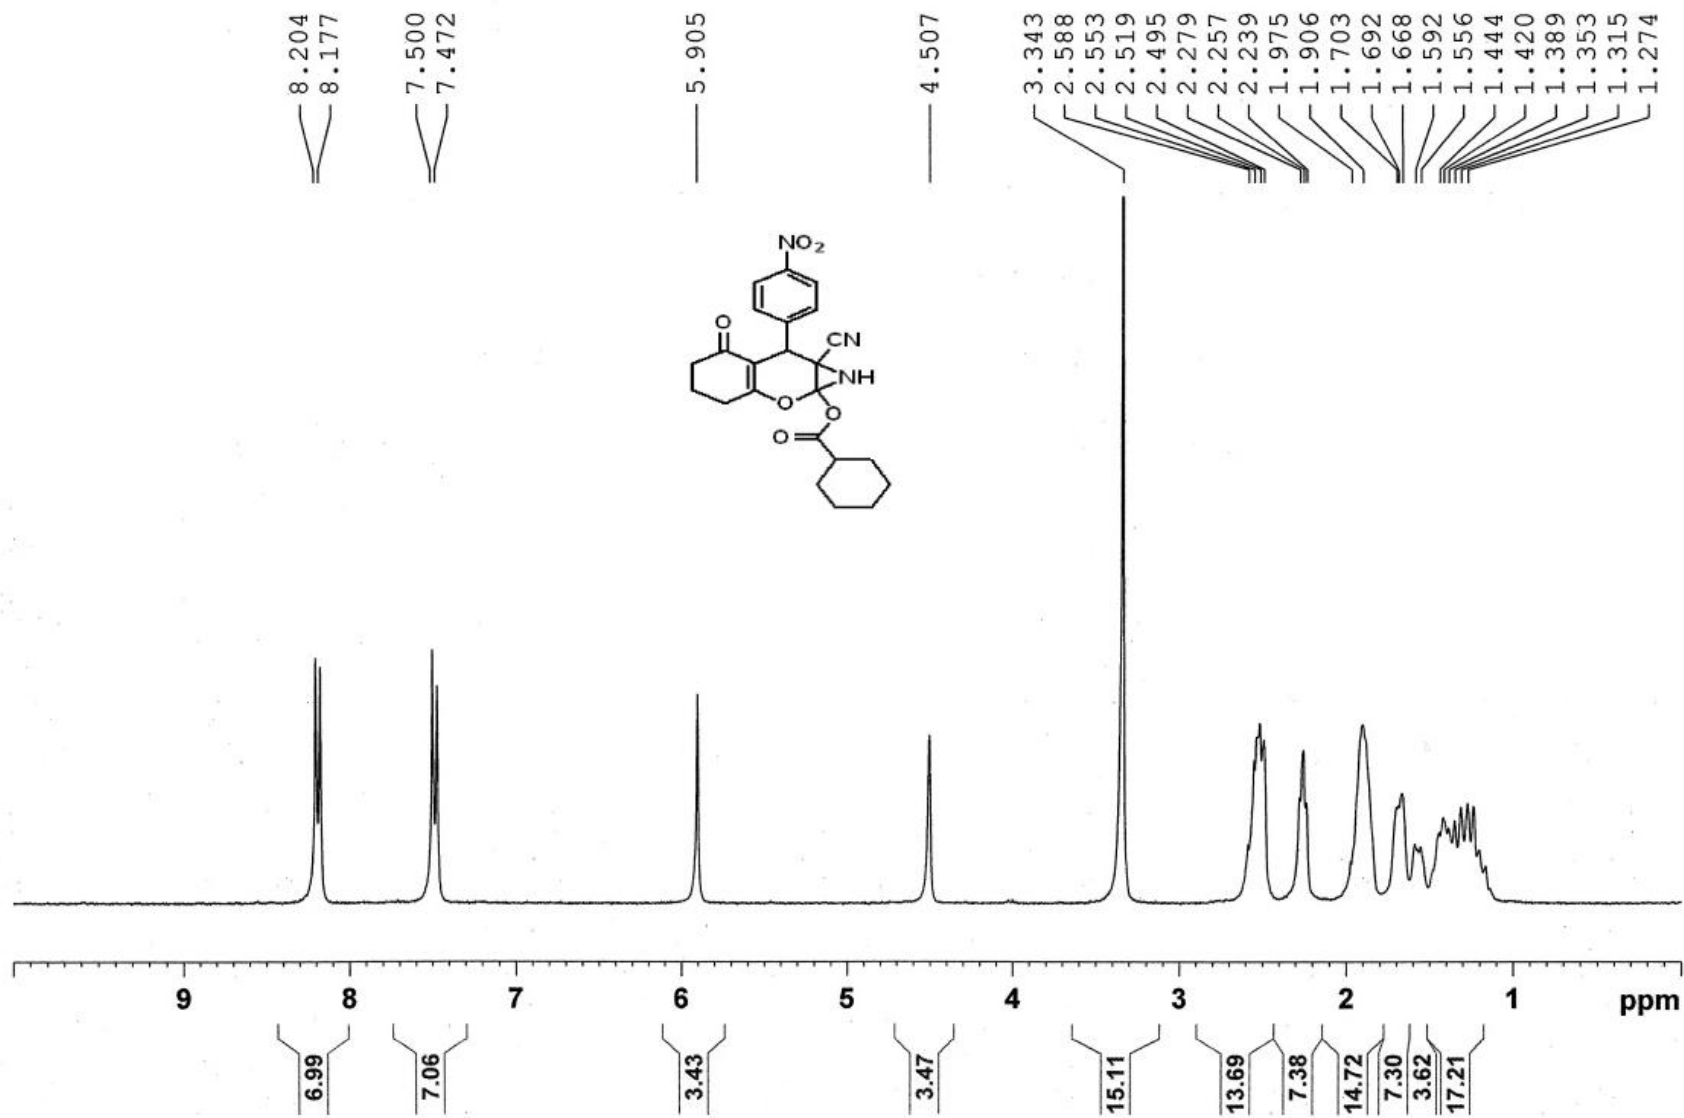

<sup>1</sup>H NMR of 3a

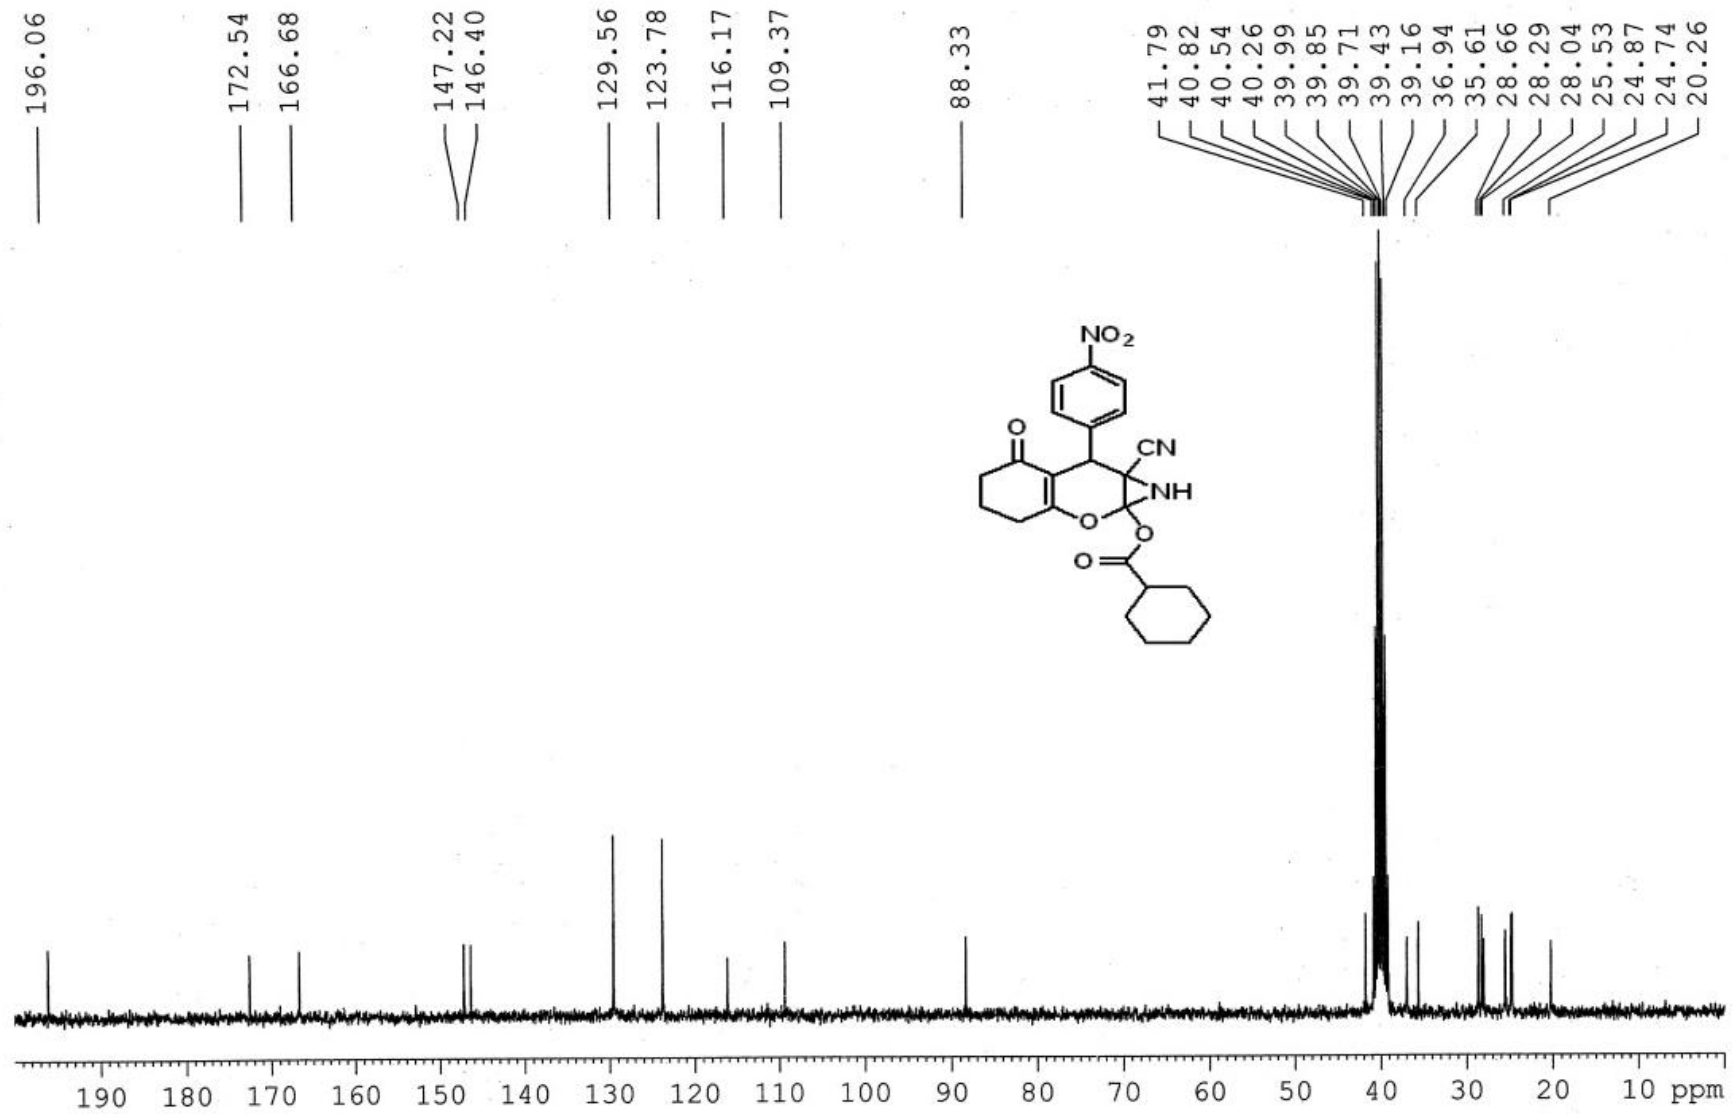

**<sup>13</sup>C NMR of 3a**

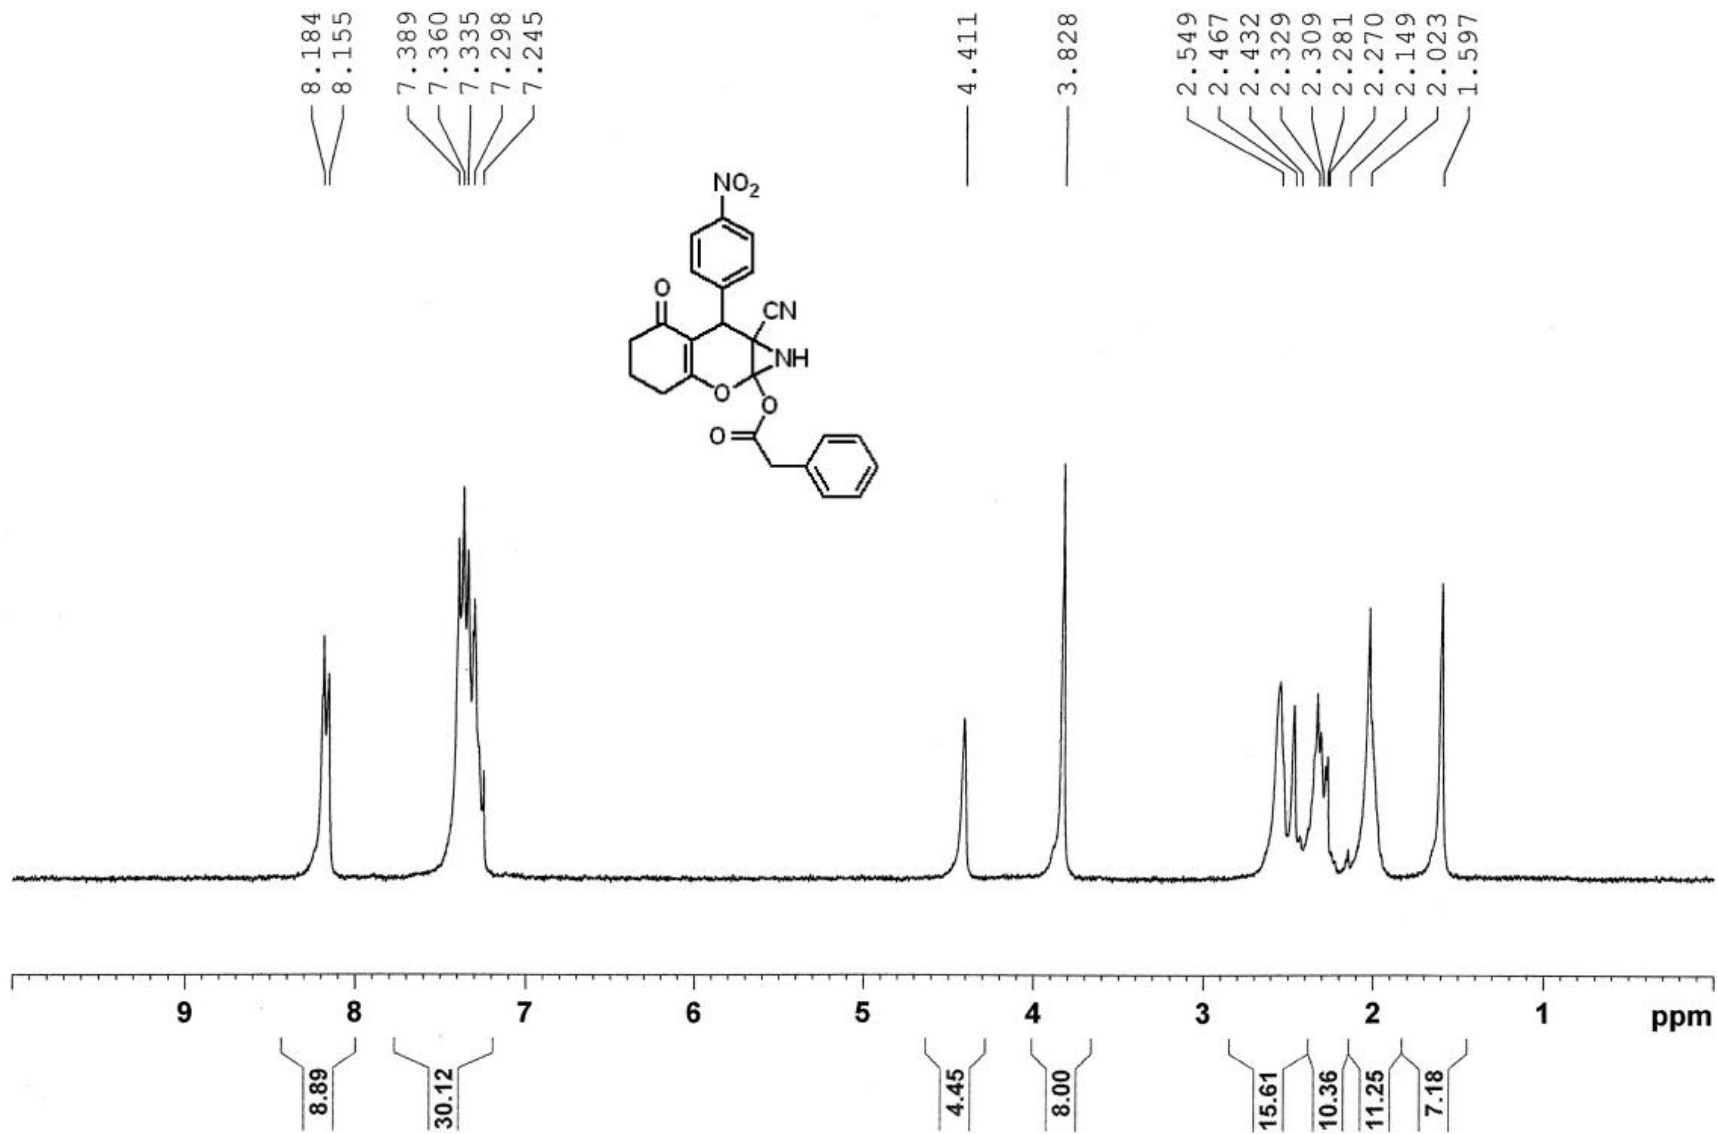

<sup>1</sup>H NMR of 3b

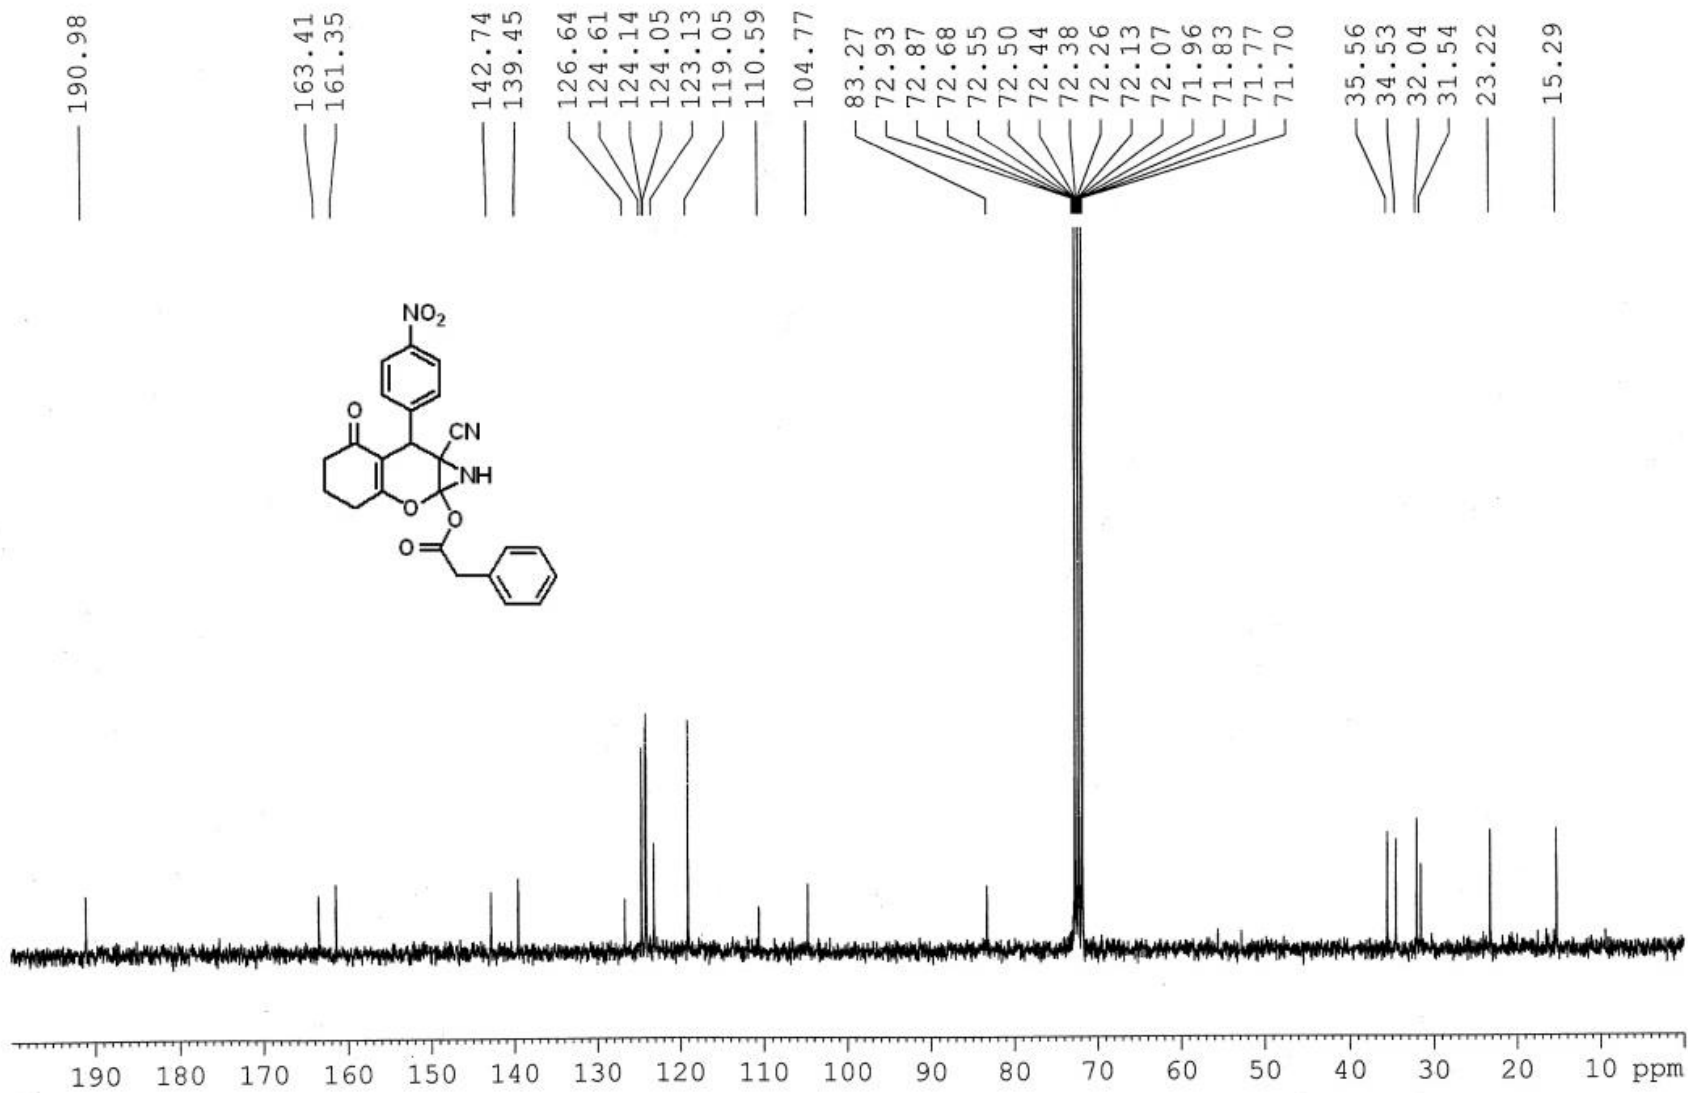

**<sup>13</sup>C NMR of 3b**

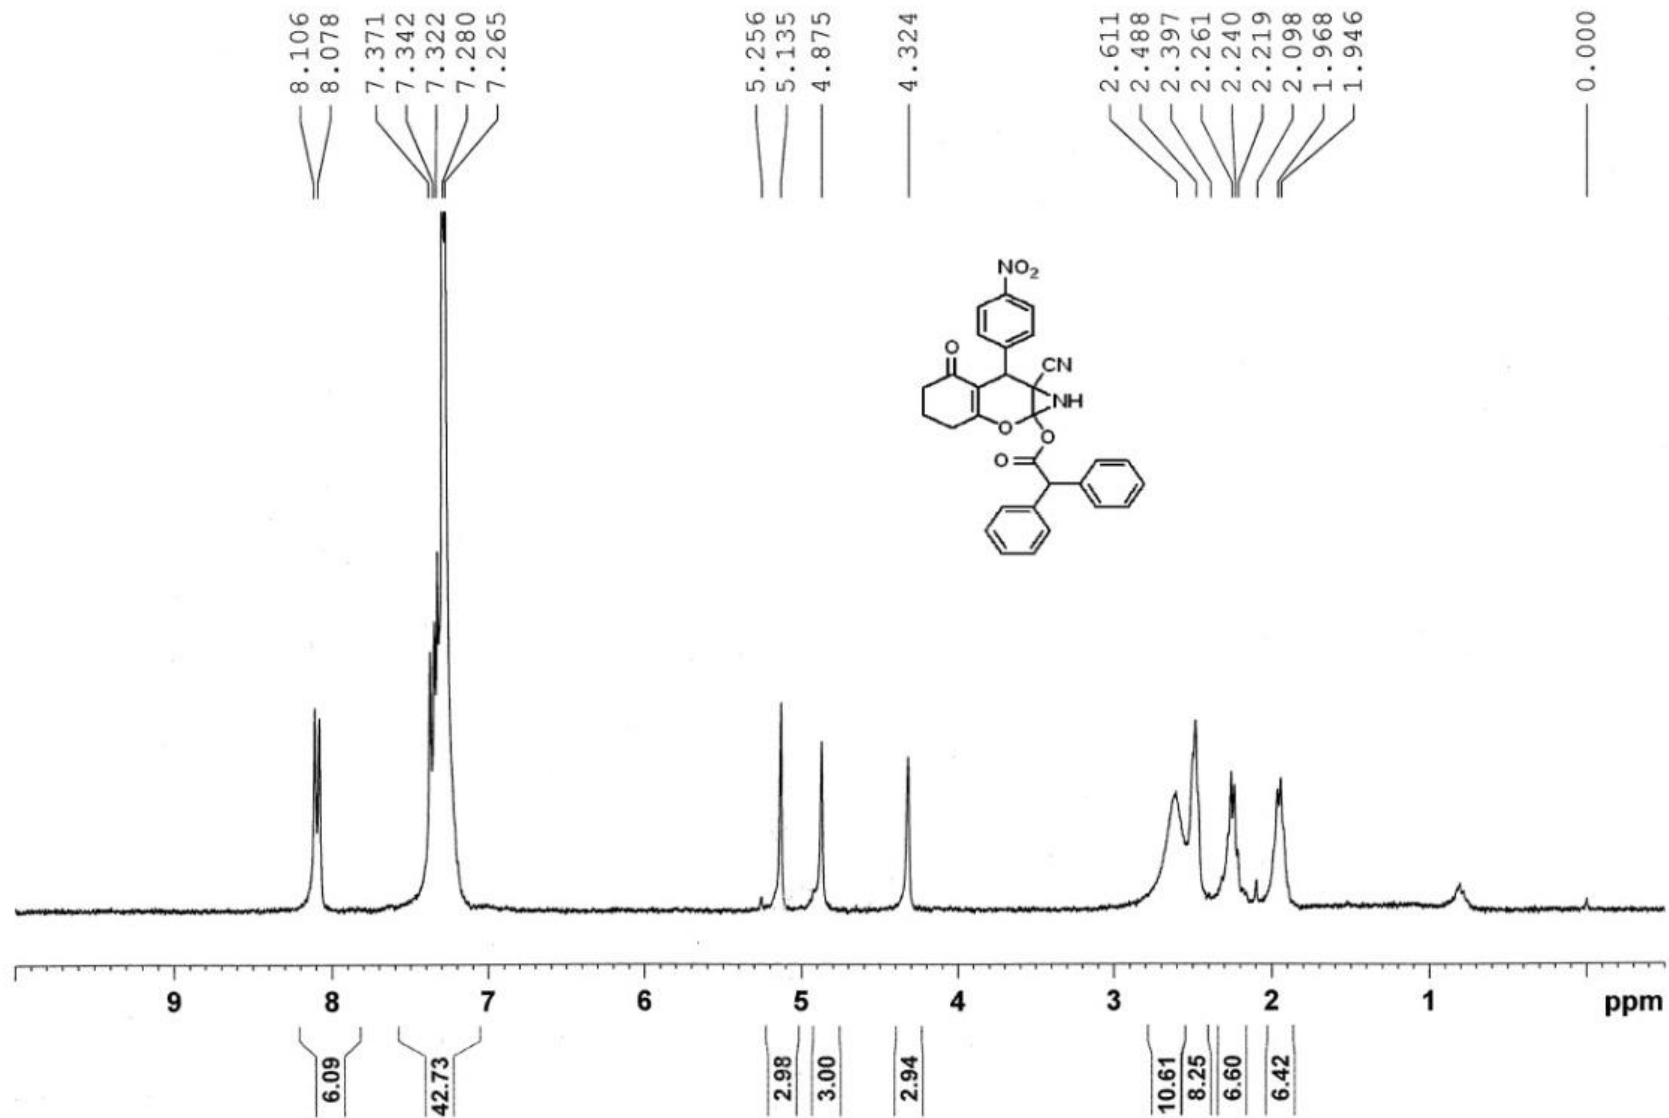

$^1\text{H}$  NMR of 3c

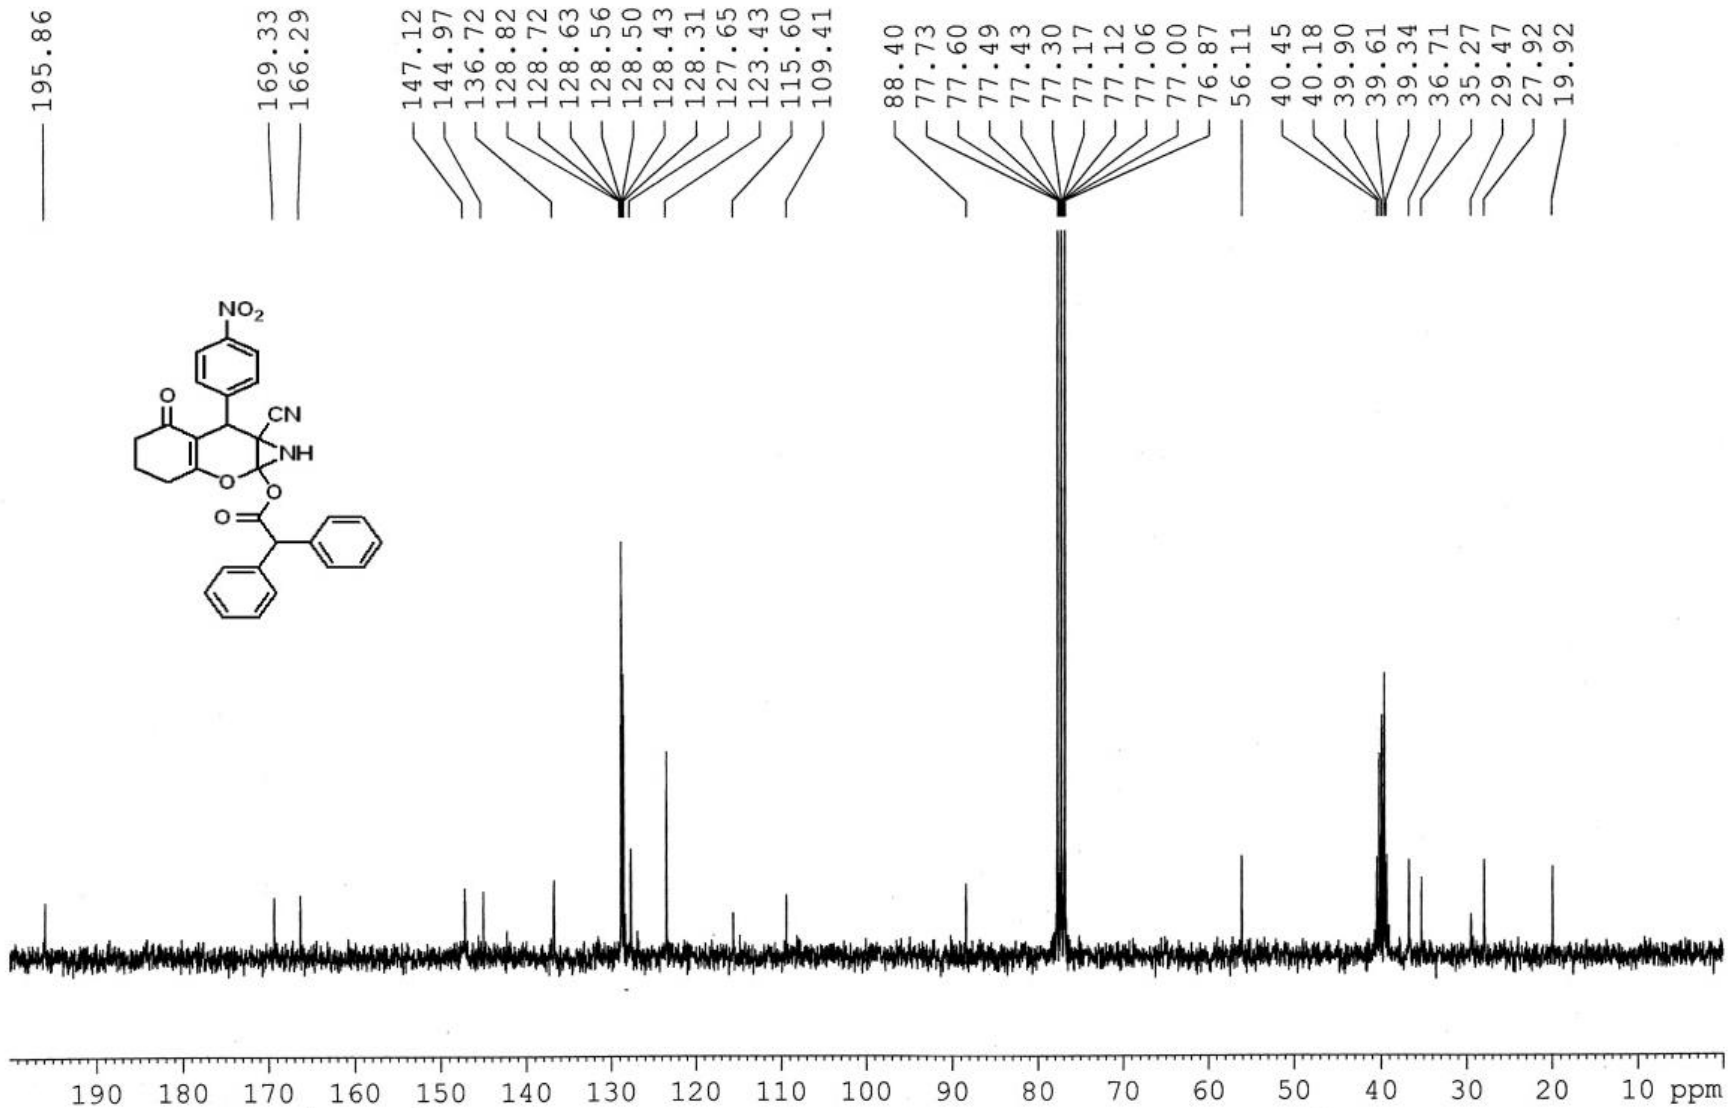

<sup>13</sup>C NMR of 3c

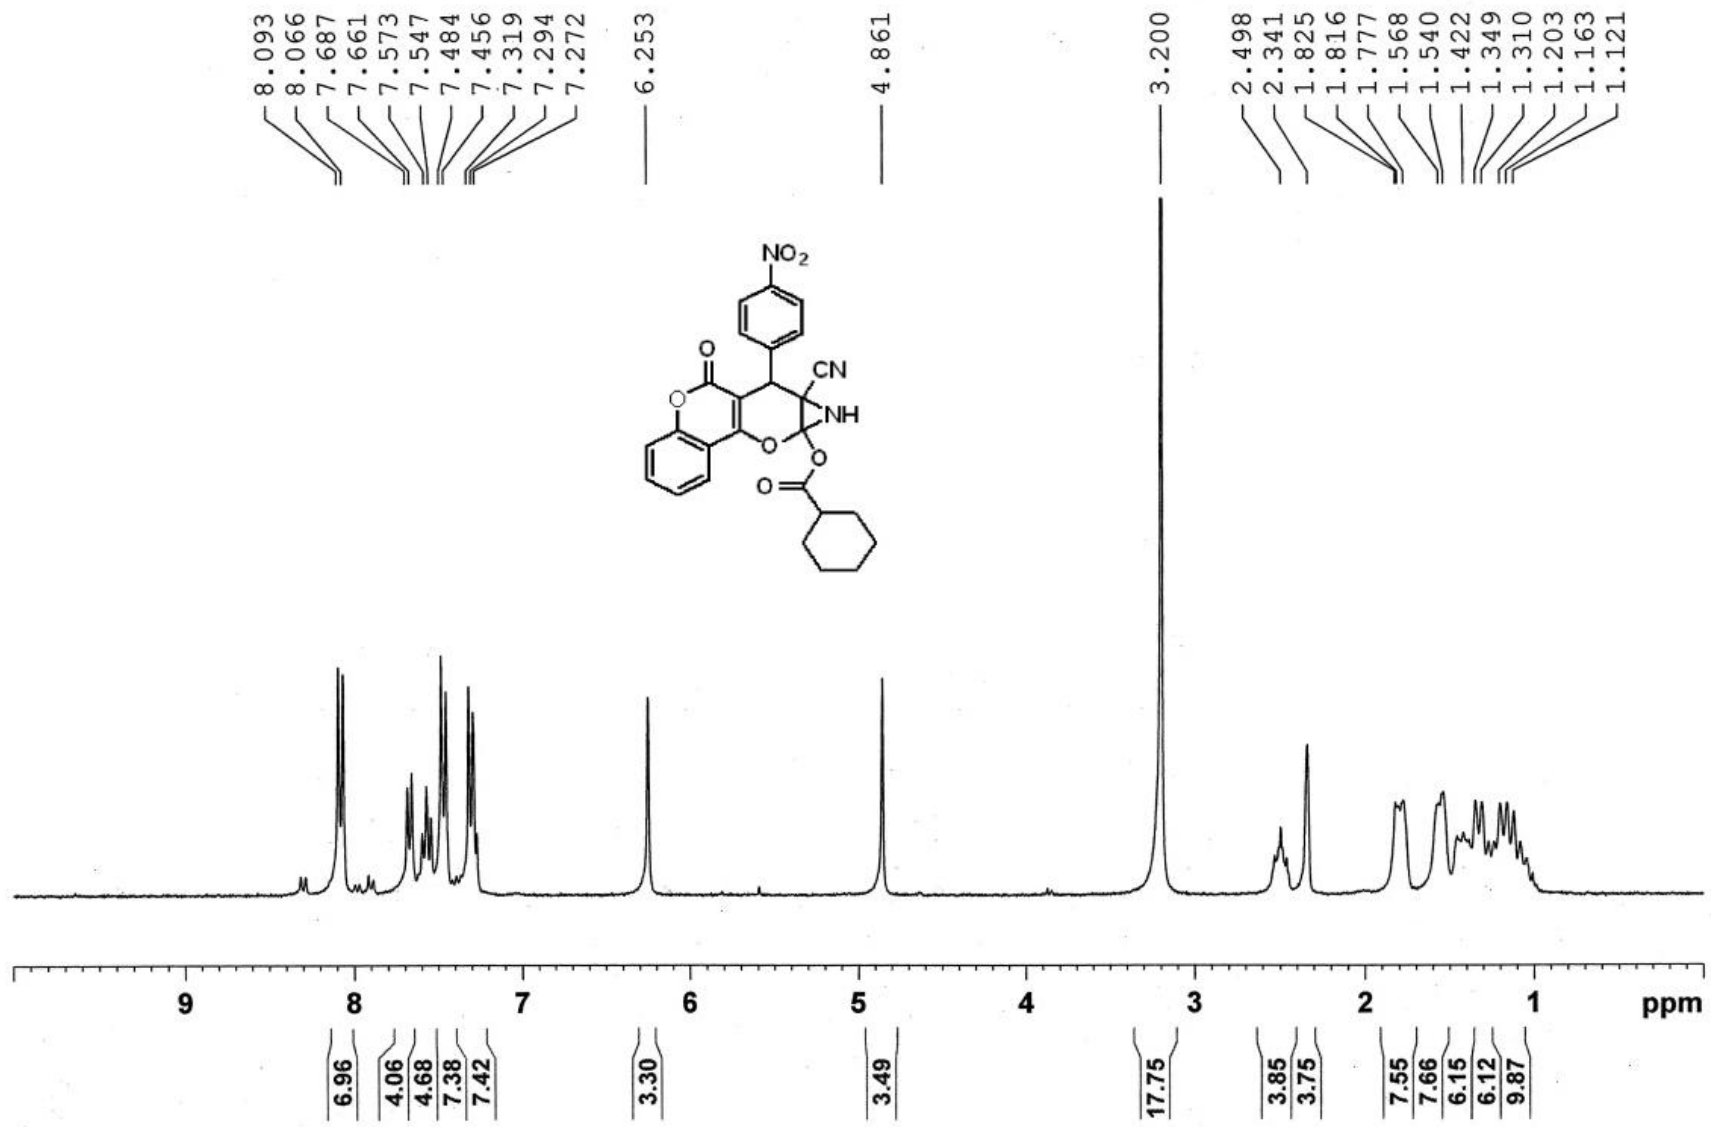

<sup>1</sup>H NMR of 3r

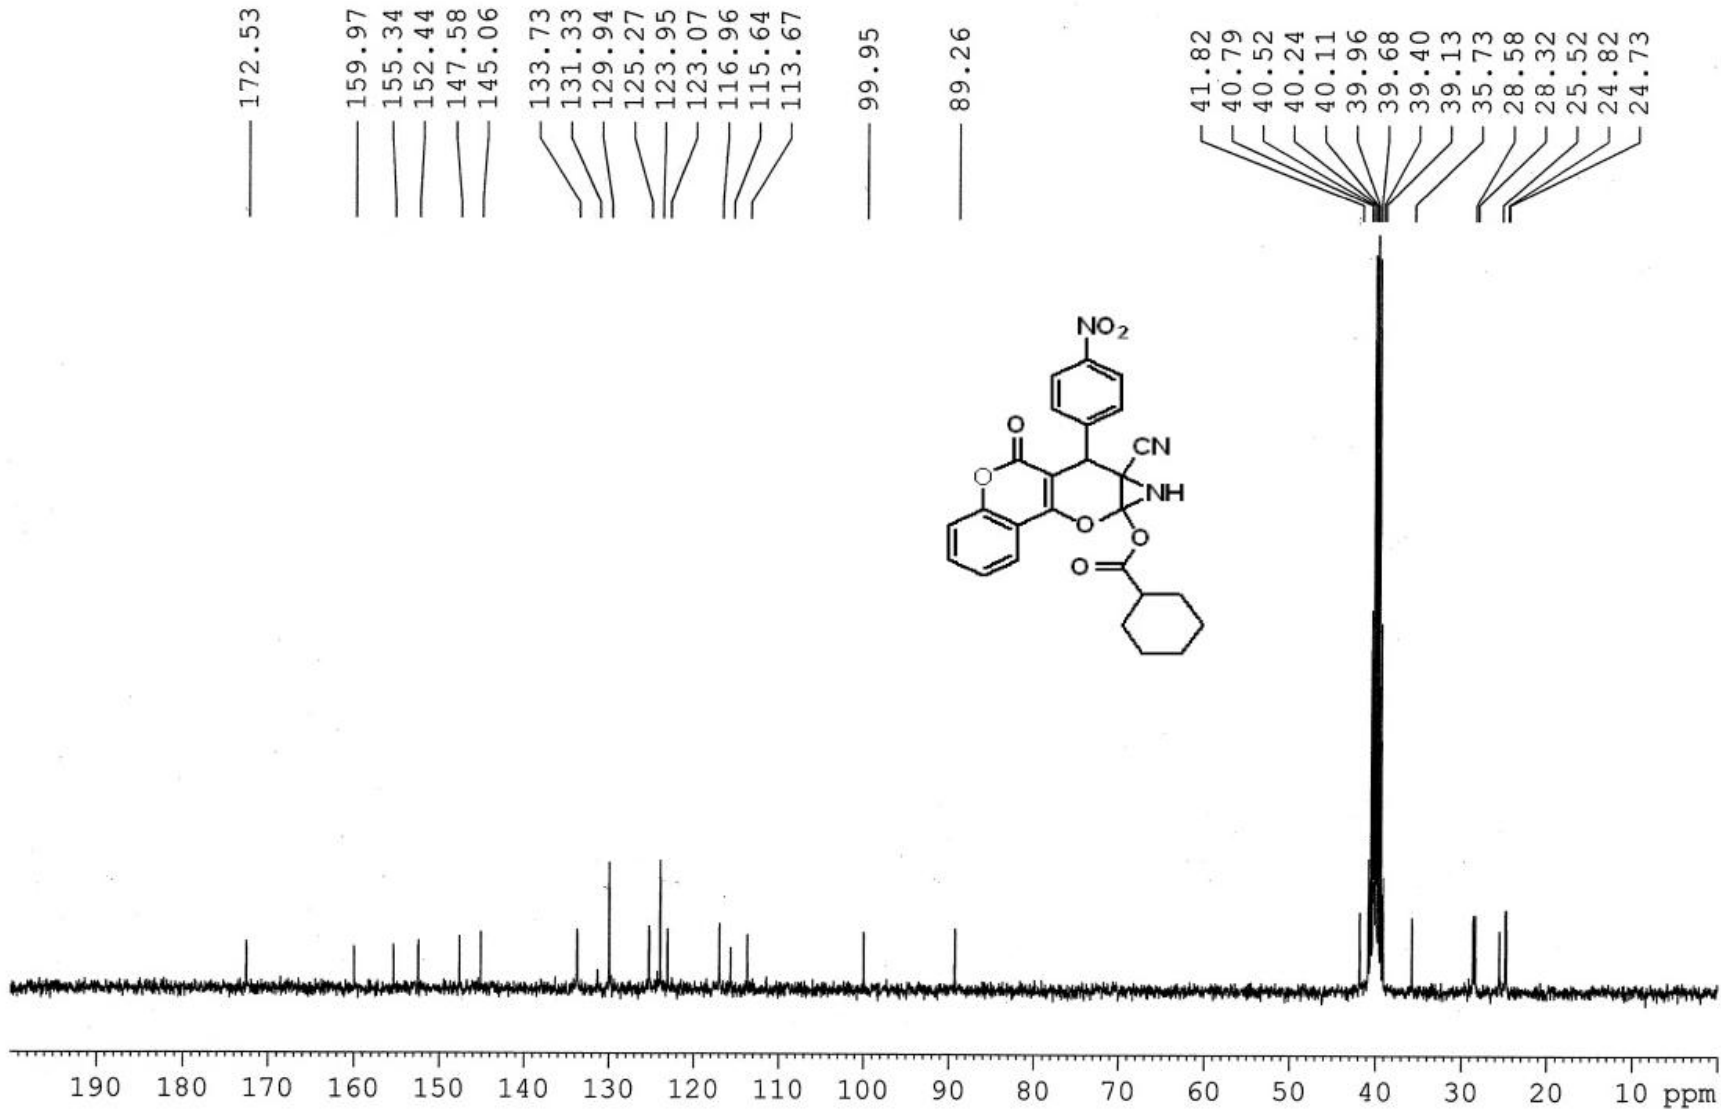

<sup>13</sup>C NMR of 3r
